# Supplementary material for: Regioselective B2–6 penta-iodination of the [CB11H12]− monocarborane cluster by palladium catalysis
Source: Royal Society of Chemistry journal article supplement (doi:10.1039/d3dt02275g), 2023-01-01

## Supplementary Information for

### Regioselective B2–6 penta-iodination of the [CB<sub>11</sub>H<sub>12</sub>]<sup>−</sup>

#### monocarborane cluster by palladium catalysis

Chuhao Lin,<sup>a</sup> Yujie Jin,<sup>a</sup> Jizeng Sun,<sup>a</sup> Zehua Ye,<sup>a</sup> Tao Chen,<sup>a</sup> Jiyong Liu,<sup>a</sup> and Simon Duttwyler<sup>a\*</sup>

<sup>a</sup>Department of Chemistry, Zhejiang University, 866 Yuhangtang Road,  
310058 Hangzhou, China

\*Email: [duttwyler@zju.edu.cn](mailto:duttwyler@zju.edu.cn)

### Table of Contents

|   |                                          |            |
|---|------------------------------------------|------------|
| 1 | General Information                      | p. S2–S3   |
| 2 | Experimental Section                     | p. S3–S16  |
| 3 | X-ray Crystallography                    | p. S17–S22 |
| 4 | References                               | p. S23     |
| 5 | NMR Spectra, Mass Spectra and IR Spectra | p. S24–S77 |

## 1 General Information

### Chemicals

Pd(OAc)<sub>2</sub> was purchased from Energy Chemicals. *N*-Iodosuccinimide (NIS) was purchased from Bidepharm. Na<sub>2</sub>SO<sub>3</sub> and [NEt<sub>4</sub>]Br were purchased from Aladdin. *n*-BuLi was obtained from Energy Chemicals. HCl (aq.), THF, HOAc and 1,4-dioxane were received from Sinopharm. Anhydrous THF was prepared by passage through activated Al<sub>2</sub>O<sub>3</sub> and stored over 3 Å molecular sieves. [NEt<sub>4</sub>][12-Me-CHB<sub>11</sub>H<sub>10</sub>], [NEt<sub>4</sub>][12-Et-CHB<sub>11</sub>H<sub>10</sub>], [NEt<sub>4</sub>][12-Ph-CHB<sub>11</sub>H<sub>10</sub>], [NEt<sub>4</sub>][1-COOH-12-I-CB<sub>11</sub>H<sub>10</sub>], and [NEt<sub>4</sub>][1-COOH-12-Br-CB<sub>11</sub>H<sub>10</sub>] were prepared according to the literature.<sup>[1,2,5]</sup>

### Characterization

1) NMR spectra were recorded on a Bruker AVANCE III 400 spectrometer (<sup>1</sup>H NMR 400.13 MHz, <sup>13</sup>C{<sup>1</sup>H} NMR 100.62 MHz, <sup>11</sup>B NMR 128.38 MHz) or a Bruker AVANCE III 500 spectrometer (<sup>1</sup>H NMR 500.13 MHz, <sup>13</sup>C NMR 125.77 MHz, <sup>11</sup>B NMR 160.46 MHz) at 296 K. Chemical shifts are given in ppm. <sup>1</sup>H{<sup>11</sup>B} NMR and <sup>13</sup>C{<sup>1</sup>H} NMR spectra were referenced using the solvent signals (<sup>1</sup>H{<sup>11</sup>B}: residual CHD<sub>2</sub>C(O)CD<sub>3</sub> = 2.05 ppm, residual CHD<sub>2</sub>CN = 1.94 ppm, <sup>13</sup>C{<sup>1</sup>H}: CD<sub>3</sub>C(O)CD<sub>3</sub> = 29.84 ppm, CD<sub>3</sub>CN = 1.32 ppm). <sup>11</sup>B and <sup>11</sup>B{<sup>1</sup>H} NMR spectra were calibrated against external BF<sub>3</sub>·Et<sub>2</sub>O = 0 ppm (BF<sub>3</sub>·Et<sub>2</sub>O capillary in C<sub>6</sub>D<sub>6</sub>). Data are reported as follows: Chemical shift in ppm, multiplicity (s = singlet, d = doublet, t = triplet, q = quartet, m = multiplet, dd = doublet of doublets, etc.), coupling constant J in Hz, integration, and (where applicable) interpretation.

#### Notes:

- In some spectra, the CH<sub>3</sub> group of the [NEt<sub>4</sub>]<sup>+</sup> cation showed <sup>3</sup>J<sub>1H,14N</sub> coupling to the central nitrogen atom, and therefore the signal appeared as a triplet of triplets (<sup>3</sup>J<sub>1H,1H</sub> and <sup>3</sup>J<sub>1H,14N</sub>). Generally speaking, coupling to <sup>14</sup>N is sometimes observed in highly symmetrical nitrogen compounds; the coupling constant is not uniformly related to the distance to the nitrogen atom.

- In certain <sup>1</sup>H{<sup>11</sup>B} NMR spectra measured in acetone-*d*<sub>6</sub>, double water peaks were observed. This is a result of different resonances from H<sub>2</sub>O and HOD.

2) High-resolution MS data were recorded using an Agilent G6545 Q-TOF instrument equipped with an electrospray ionization source (ESI).

3) Single-crystal X-ray diffraction studies were performed on a Bruker D8 Venture diffractometer equipped with a 135 mm Atlas CCD detector and using a Mo X-ray source.

4) Infrared spectra were recorded on a Thermo NICOLET AVATAR 330FT-IR spectrometer.

## 2 Experimental Section

### Synthesis of $[\text{NEt}_4][1\text{-COOH-12-X-CB}_{11}\text{H}_{10}]$ (X = H, Me, Et, Ph)

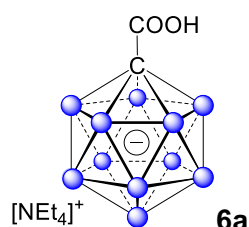

A dry 50 mL single-neck pear-shaped flask equipped with magnetic stir bar was charged with  $[\text{Cs}][\text{CHB}_{11}\text{H}_{11}]$  (500 mg, 1.81 mmol) and capped with a rubber septum. Anhydrous THF (15 mL) was then added to the flask in glove box. A solution of *n*-BuLi (1.6 M in hexane, 4.5 mL, 7.2 mmol) was cautiously added at 25 °C, dropwise. After stirring for 4 h, a slightly turbid, white suspension was obtained. The mixture reacted overnight under with  $\text{CO}_2$  (1 atmosphere, 2-3 bubbles/s), and the solution turned pale yellow. The reaction was quenched with water (5 mL), and then THF was removed with a rotary evaporator.  $[\text{NEt}_4]\text{NBr}$  (1.142 g, 5.43 mmol) was added, and the resulting white precipitate was separated using a glass frit funnel (F porosity) and washed with water (3 x 2mL). HCl (1 M aq., 1 mL, 12 mmol) was added dropwise to the yellowish filtrate, the resulting white precipitate was collected in a glass frit and dried in a vacuum to give the salt  $[\text{NEt}_4][1\text{-COOH-CB}_{11}\text{H}_{11}]$  as a white solid (522 mg, 1.647 mmol, 91%).

The NMR data were in accordance with the literature.<sup>[1]</sup>

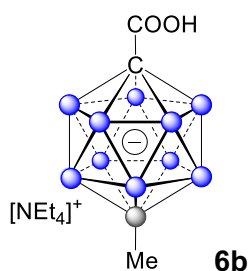

Following a similar procedure as for the preparation of  $[\text{NEt}_4][1\text{-COOH-CB}_{11}\text{H}_{11}]$ , using  $[\text{NEt}_4][12\text{-Me-CB}_{11}\text{H}_{11}]$  (100 mg, 0.349 mmol) as starting material,  $[\text{NEt}_4][1\text{-COOH-12-Me-CB}_{11}\text{H}_{10}]$  was obtained as a colorless solid (79.8 mg, 69%).

The NMR data were in accordance with the literature.<sup>[4]</sup>

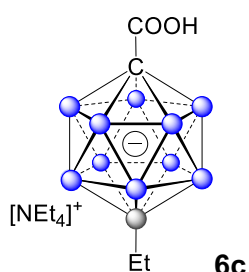

Following a similar procedure as for the preparation of  $[\text{NEt}_4][1\text{-COOH-CB}_{11}\text{H}_{11}]$ , using  $[\text{NEt}_4][12\text{-Et-CB}_{11}\text{H}_{11}]$  (100 mg, 0.333 mmol) as starting material,  $[\text{NEt}_4][1\text{-COOH-12-Et-CB}_{11}\text{H}_{10}]$  was obtained as a colorless solid (87 mg, 75%).

The NMR data were in accordance with the literature.<sup>[3]</sup>

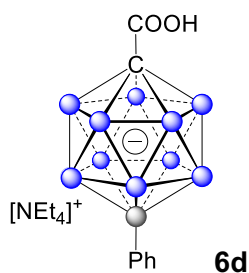

Following a similar procedure as for the preparation of  $[\text{NEt}_4][1\text{-COOH-CB}_{11}\text{H}_{11}]$ , using  $[\text{NEt}_4][12\text{-Ph-CB}_{11}\text{H}_{11}]$  (178.7 mg, 0.513 mmol) as starting material,  $[\text{NEt}_4][1\text{-COOH-12-Ph-CB}_{11}\text{H}_{10}]$  was obtained as a colorless solid (155.6 mg, 77%).

The NMR data were in accordance with the literature.<sup>[3]</sup>

## Optimization of reaction conditions

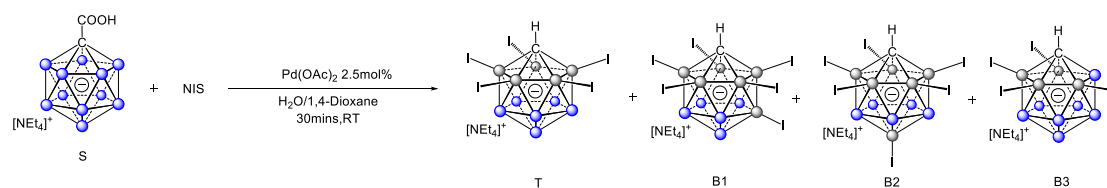

**Figure S1.** Reaction of the monocarborane carboxylic acid **S** leading to the desired product **T** and byproducts **B** (blue spheres = BH, gray spheres = B).

To a 2.5 mL glass vial equipped with a magnetic stir bar, **S** (5 mg, 1.0 equiv, 0.0158 mmol) and *N*-iodosuccinimide (NIS) (varying amounts, see below) were added (see Figure S1 for the definition of **S** and the products **T/B1–3**). Then a Pd(OAc)<sub>2</sub> solution (0.3 mL from a stock solution of 6.0 mg Pd(OAc)<sub>2</sub> in 20 mL anhydrous 1,4-dioxane; 2.5 mol%, 0.0004 mmol) and deionized H<sub>2</sub>O (varying amounts, see below) were added. The reaction mixture was stirred for 30 mins at 25 °C. The reaction outcome was evaluated by <sup>11</sup>B {<sup>1</sup>H} NMR spectroscopy.

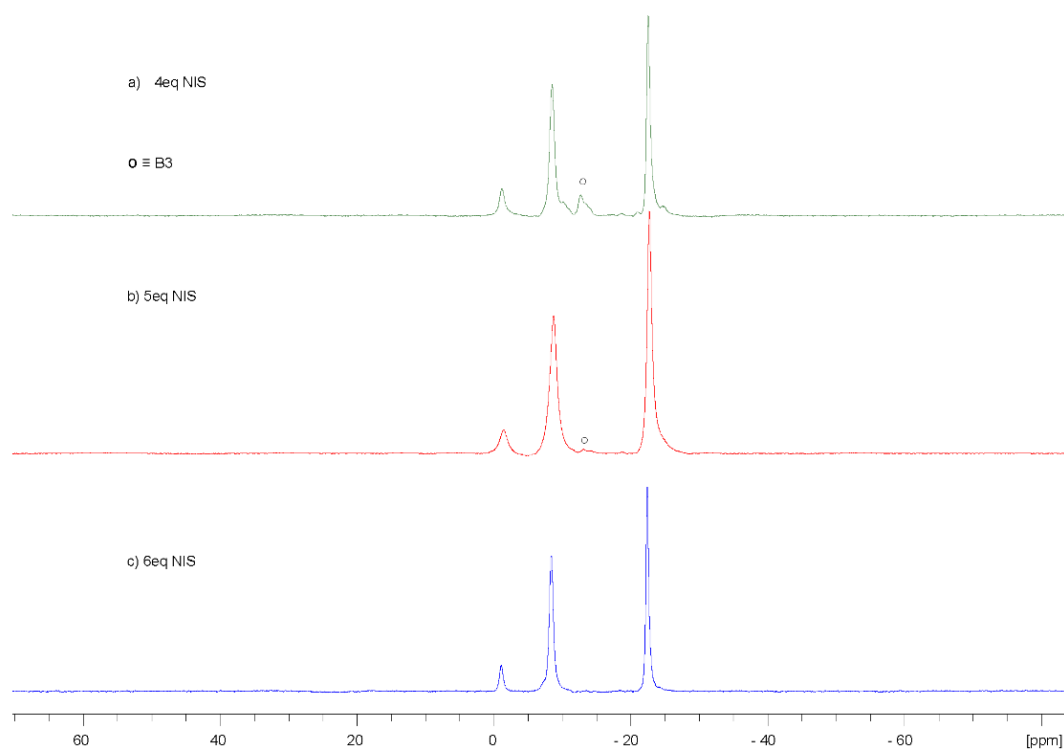

**Figure S2.** All reactions were performed with 6% H<sub>2</sub>O; a) with 4 equiv of NIS; b) with 5 equiv of NIS; c) with 6 equiv of NIS.

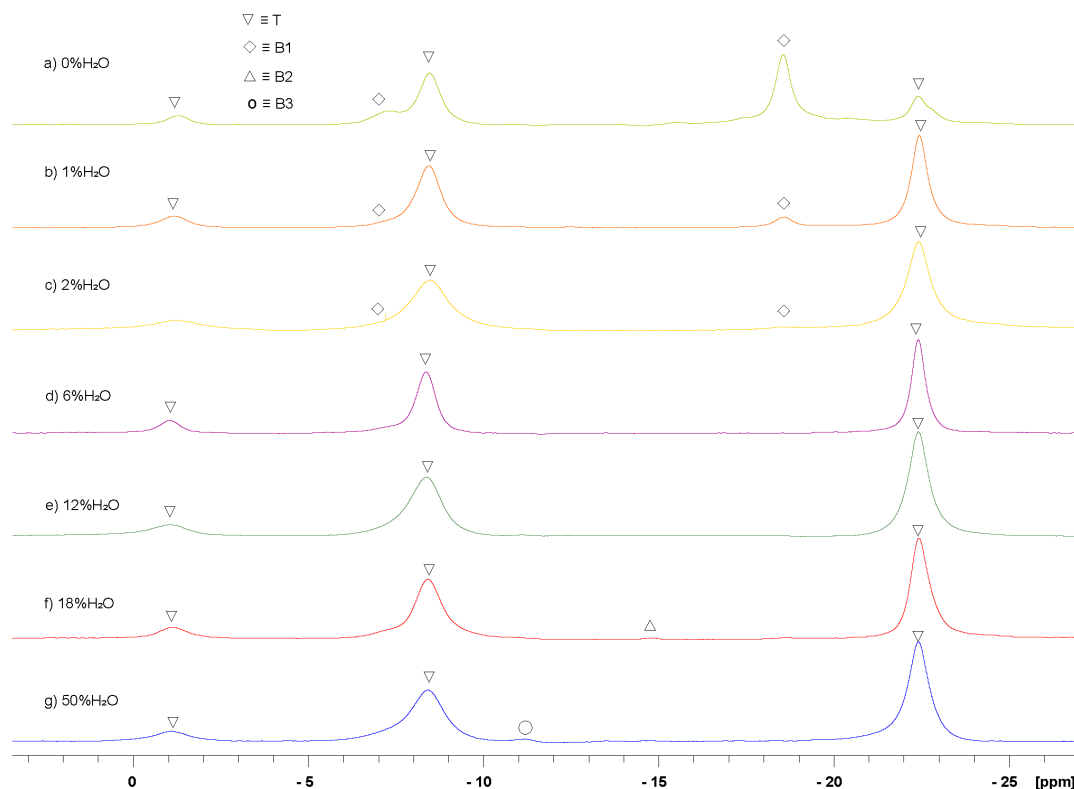

**Figure S3.** All reactions were performed with 6 equiv of NIS; a) 0% H<sub>2</sub>O; b) 1% H<sub>2</sub>O; c) 2% H<sub>2</sub>O; d) 6% H<sub>2</sub>O; e) 12% H<sub>2</sub>O; f) 18% H<sub>2</sub>O; g) 50% H<sub>2</sub>O.

Remarks: A ratio of H<sub>2</sub>O equal to 6% (marked as "6% H<sub>2</sub>O" in the spectra) means that the solvent was a mixture of 18  $\mu$ L H<sub>2</sub>O and 0.3 mL 1,4-dioxane. Other percentages having a similar meaning.

Figure S2 shows the effect of the amount of NIS, while H<sub>2</sub>O was kept at 6%. The use of 6 equiv of NIS gave the desired product **T** as the major product, as indicated by the spectrum of the reaction mixture.

Figure S3 shows the effect of the amount of H<sub>2</sub>O, while NIS was kept at 6 equivalents. The use of 6% to 18% H<sub>2</sub>O gave the best results.

In summary, the screening of conditions indicated that a combination of 6 equivalents of NIS and 6–18% H<sub>2</sub>O allowed for the formation of the desired penta-iodinated product under convenient conditions, namely, 30 min at 25 °C.

## Synthesis of $[\text{NEt}_4][2,3,4,5,6\text{-I}_5\text{-12-X-CHB}_{11}\text{H}_6]$ ( $\text{X} = \text{H, Me, Et, Ph, I, Br}$ )

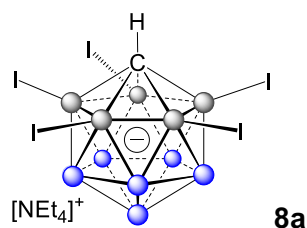

To a 10 mL glass vial equipped with a magnetic stir bar,  $[\text{NEt}_4][1\text{-COOH-CB}_{11}\text{H}_{11}]$  (50 mg, 1.0 equiv, 0.158 mmol) and NIS (213 mg, 6.0 equiv, 0.947 mmol) were added. Then  $\text{Pd}(\text{OAc})_2$  solution (3.0 mL from a stock solution of 6.0 mg  $\text{Pd}(\text{OAc})_2$  in 20 mL anhydrous 1,4-dioxane; 2.5 mol%, 0.004 mmol) and deionized  $\text{H}_2\text{O}$  (0.36 mL) were added. The reaction mixture was stirred for 30 min at 25 °C. Aqueous  $\text{Na}_2\text{SO}_3$  solution (29.8 mg  $\text{Na}_2\text{SO}_3$  in 5 mL deionized  $\text{H}_2\text{O}$ ; 1.5 equiv, 0.237 mmol) was added to the mixture dropwise.  $\text{NEt}_4\text{Br}$  (99.4 mg, 3.0 equiv, 0.473 mmol) was added to precipitate the product under sonification. 1,4-dioxane was then removed under reduced pressure. The resulting mixture was placed in a glass frit funnel (F porosity), the aqueous layer was removed, and the remaining solid was washed three times with  $\text{H}_2\text{O}$  and dried in a vacuum to give salt  $[\text{NEt}_4][2,3,4,5,6\text{-I}_5\text{-CHB}_{11}\text{H}_6]$  as a white powder (129 mg, 0.143 mmol, 91% yield).

Reaction scale-up: To a 100 mL round bottom flask equipped with a magnetic stir bar,  $[\text{NEt}_4][1\text{-COOH-CB}_{11}\text{H}_{11}]$  (500 mg, 1.0 equiv, 1.58 mmol) and NIS (2.13 g, 6.0 equiv, 9.467 mmol) were added. Then  $\text{Pd}(\text{OAc})_2$  solution (9 mg  $\text{Pd}(\text{OAc})_2$  in 30 mL anhydrous 1,4-dioxane; 2.5 mol%, 0.04 mmol) and deionized  $\text{H}_2\text{O}$  (3.6 mL) were added. The reaction mixture was stirred for 30 min at 25 °C. Aqueous  $\text{Na}_2\text{SO}_3$  solution (298 mg in 30 mL deionized  $\text{H}_2\text{O}$ ; 1.5 equiv, 2.37 mmol) was added to the mixture dropwise.  $\text{NEt}_4\text{Br}$  (994 mg, 3 equiv, 4.73 mmol) was added to precipitate the product under sonification. 1,4-dioxane was then removed under reduced pressure. The resulting mixture was placed in a glass frit funnel (F porosity), the aqueous layer was removed, and the remaining solid was washed three times with  $\text{H}_2\text{O}$  and dried in a vacuum to give salt  $[\text{NEt}_4][2,3,4,5,6\text{-I}_5\text{-CHB}_{11}\text{H}_6]$  as a white powder (1.31 g, 1.45 mmol, 92% yield).

$^1\text{H}\{^{11}\text{B}\}$  NMR (500 MHz, acetonitrile- $d_3$ , 296 K):  $\delta$  3.15 (q,  $J = 7.3$  Hz, 8H, cation  $\text{CH}_2$ ), 3.08 (s, 1H, cage CH), 2.67 (s, 5H, BH), 2.09 (broad signal overlapping with  $\text{H}_2\text{O}$  signal, 1H, BH), 1.21 (tt,  $J = 7.3\text{Hz}, 1.9$  Hz, 12H, cation  $\text{CH}_3$ ).

$^{11}\text{B}\{^1\text{H}\}$  NMR (128 MHz, acetone- $d_6$ , 296 K):  $\delta$  -1.66 (1B), -9.08 (5B), -23.17 (5B).

$^{13}\text{C}\{^1\text{H}\}$  NMR (101 MHz, acetone- $d_6$ , 296 K):  $\delta$  64.87 (cage C), 52.01 (cation  $\text{CH}_2$ ), 6.70 (cation  $\text{CH}_3$ ).

HRMS (ESI):  $m/z$  Calcd for  $[\text{CB}_{11}\text{I}_5\text{H}_7]^-$ , 772.6867; found, 772.6877.

IR (KBr):  $\nu$  3551, 3483, 3416, 3032, 2560, 1618, 1482, 1102, 912, 841, 782, 617.

### Ion Exchange:

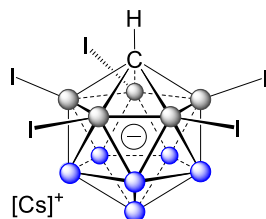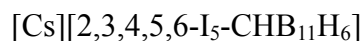

To a 100 mL glass bottle equipped with a magnetic stir bar,  $[\text{NEt}_4][2,3,4,5,6\text{-I}_5\text{-CHB}_{11}\text{H}_6]$  (300mg, 1.0 equiv, 0.3330 mmol), deionized  $\text{H}_2\text{O}$  (10 mL),  $\text{HCl}$  (1M aq.) (0.3 mL, 10.8 equiv, 3.6 mmol) and ether (50mL) were added. The mixture was stirred at room temperature until the solution became clear. The aqueous phase was extracted with ether (3 x 10mL), then then the combined organic phases were treated with deionized  $\text{H}_2\text{O}$  (10 mL) and  $\text{Cs}_2\text{CO}_3$  (108.6 mg, 1.0 equiv, 0.3330 mmol). All volatiles were removed in a vacuum, then the remaining solids were dissolved in acetone and filtered. The filtrate contained the desired product and was concentrated on a rotary evaporator to give a solid. It was further dried in a vacuum to give salt  $[\text{Cs}][2,3,4,5,6\text{-I}_5\text{-CHB}_{11}\text{H}_6]$  as a brownish-gray solid (284 mg, 0.3135 mmol, 94% yield).



$^1\text{H}\{^{11}\text{B}\}$  NMR (400 MHz, acetone- $d_6$ , 296 K): 2.78 (s, 1H, cage CH), 2.74 (s, 5H, BH), 2.14 (s, 1H, BH).

$^{11}\text{B}\{^1\text{H}\}$  NMR (128 MHz, acetone- $d_6$ , 296 K):  $\delta$  -1.60 (1B), -9.05 (5B), -23.17 (5B).

$^{13}\text{C}\{^1\text{H}\}$  NMR (101 MHz, acetone- $d_6$ , 296 K):  $\delta$  65.88 (cage C).

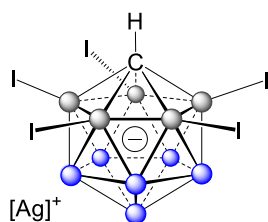

[Ag][2,3,4,5,6-I<sub>5</sub>-CHB<sub>11</sub>H<sub>6</sub>]

To a 10 mL glass vial equipped with a magnetic stir bar, [Cs][2,3,4,5,6-I<sub>5</sub>-CHB<sub>11</sub>H<sub>6</sub>] (100 mg, 1.0 equiv, 0.1104 mmol) was added. Deionized H<sub>2</sub>O (1.0 mL) was added, and the mixture was heated to a boil, upon which the solution became clear. AgNO<sub>3</sub> (20.73 mg, 1.1 equiv, 0.1219 mmol) was dissolved in deionized H<sub>2</sub>O (0.4 mL) and then slowly added dropwise. A white precipitate was obtained, which was filtered and washed with cold water and dried in a vacuum to give salt [Ag][2,3,4,5,6-I<sub>5</sub>-CHB<sub>11</sub>H<sub>6</sub>] as an off-white solid (87.2 mg, 0.0989 mmol, 90% yield).

$^1\text{H}\{^{11}\text{B}\}$  NMR (400 MHz, acetonitrile- $d_3$ , 296 K):  $\delta$  3.10 (s, 1H, cage CH), 2.67 (s, 5H, BH), 2.08 (s, 1H, BH).

$^{11}\text{B}\{^1\text{H}\}$  NMR (128 MHz, acetonitrile- $d_3$ , 296 K):  $\delta$  -1.65 (1B), -9.02 (5B), -23.28 (5B).

$^{13}\text{C}\{^1\text{H}\}$  NMR (101 MHz, acetonitrile- $d_3$ , 296 K):  $\delta$  64.98 (cage C).

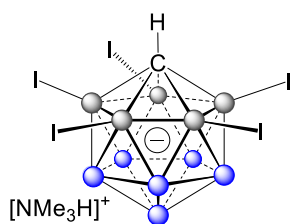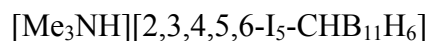

To a 10 mL glass vial equipped with a magnetic stir bar, [Cs][2,3,4,5,6-I<sub>5</sub>-CHB<sub>11</sub>H<sub>6</sub>] (90 mg, 1.0 equiv, 0.0994 mmol) was added. Then deionized H<sub>2</sub>O (1.0 mL) was added, and the mixture was heated to a boil, upon which the solution became clear. Me<sub>3</sub>N·HCl (28.8 mg, 3.0 equiv, 0.2982 mmol) was dissolved in deionized H<sub>2</sub>O (0.4 mL) and then slowly added dropwise. A white precipitate was obtained, which was filtered and washed with cold water and dried in a vacuum to give salt [Me<sub>3</sub>NH][2,3,4,5,6-I<sub>5</sub>-CHB<sub>11</sub>H<sub>6</sub>] as a white solid (72.9 mg, 0.0874 mmol, 88% yield).

<sup>1</sup>H{<sup>11</sup>B} NMR (400 MHz, acetonitrile-*d*<sub>3</sub>, 296 K): 3.23 (s, 9H, cation CH<sub>3</sub>), 2.90 (broad signal, 1H, cation NH), 2.78 (s, 1H, cage CH), 2.74 (s, 5H, BH), 2.14 (s, 1H, BH).

<sup>11</sup>B{<sup>1</sup>H} NMR (128 MHz, acetonitrile-*d*<sub>3</sub>, 296 K): δ -1.60 (1B), -9.06 (5B), -23.17 (5B).

<sup>13</sup>C{<sup>1</sup>H} NMR (101 MHz, acetonitrile-*d*<sub>3</sub>, 296 K): δ 65.90 (cage C), 46.27 (cation CH<sub>3</sub>).

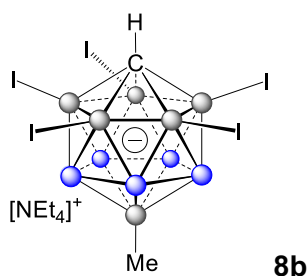

Starting from (20.1 mg, 0.0604 mmol) of  $[\text{NEt}_4][1\text{-COOH-12-Me-CB}_{11}\text{H}_{10}]$  and following the procedure for the synthesis of  $[\text{NEt}_4][2,3,4,5,6\text{-I}_5\text{-CHB}_{11}\text{H}_6]$ ,  $[\text{NEt}_4][2,3,4,5,6\text{-I}_5\text{-12-Me-CHB}_{11}\text{H}_5]$  was obtained as a white solid (43.8 mg, 0.0478 mmol, 79% yield).

$^1\text{H}\{^{11}\text{B}\}$  NMR (500 MHz, acetonitrile- $d_3$ , 296 K):  $\delta$  3.15 (q,  $J = 7.3$  Hz, 8H, cation  $\text{CH}_2$ ), 2.81 (s, 1H, cage CH), 2.67 (s, 5H, BH), 1.21 (tt,  $J = 7.3$  Hz, 1.9 Hz, 12H, cation  $\text{CH}_3$ ), 0.00 (s, 3H, methyl  $\text{CH}_3$ ).

$^{11}\text{B}\{^1\text{H}\}$  NMR (128 MHz, acetone- $d_6$ , 296 K):  $\delta$  7.51 (1B), -7.96 (5B), -23.71 (5B).

$^{13}\text{C}\{^1\text{H}\}$  NMR (101 MHz, acetone- $d_6$ , 296 K):  $\delta$  58.69 (cage C), 53.03 (cation  $\text{CH}_2$ ), 7.72 (cation  $\text{CH}_3$ ). The B- $\text{CH}_3$  signal could not be detected unambiguously but was detected indirectly using an HSQC spectrum at 4.1 ppm.

HRMS (ESI):  $m/z$  Calcd for  $[\text{C}_2\text{B}_{11}\text{I}_5\text{H}_9]^-$ , 786.7024; found, 786.7039.

IR(KBr):  $\nu$  3436, 2986, 2565.88, 1631, 1480, 1182, 1096, 912, 835, 697.

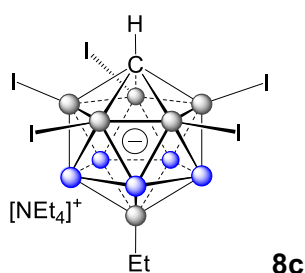

Starting from (20.0 mg, 0.0580 mmol) of  $[\text{NEt}_4][1\text{-COOH-12-Et-CB}_{11}\text{H}_{10}]$  and following the procedure for the synthesis of  $[\text{NEt}_4][2,3,4,5,6\text{-I}_5\text{-CHB}_{11}\text{H}_6]$ ,  $[\text{NEt}_4][2,3,4,5,6\text{-I}_5\text{-12-Et-CHB}_{11}\text{H}_5]$  was obtained as a white solid (39.0 mg, 0.0419 mmol, 72% yield).

$^1\text{H}\{^{11}\text{B}\}$  NMR (500 MHz, acetonitrile- $d_3$ , 296 K):  $\delta$  3.15 (q,  $J = 7.3$  Hz, 8H, cation  $\text{CH}_2$ ), 2.86 (s, 1H, cage CH), 2.65 (s, 5H, BH), 1.21 (tt,  $J = 7.3$  Hz, 1.9 Hz, 12H, cation  $\text{CH}_3$ ), 0.75 (t, 3H, ethyl  $\text{CH}_3$ ), 0.49 (t, 2H, ethyl  $\text{CH}_2$ ).

$^{11}\text{B}\{^1\text{H}\}$  NMR (128 MHz, acetone- $d_6$ , 296 K):  $\delta$  9.64 (1B), -8.56 (5B), -23.81 (5B).

$^{13}\text{C}\{^1\text{H}\}$  NMR (101 MHz, acetone- $d_6$ , 296 K):  $\delta$  59.38 (cage C), 53.02 (cation  $\text{CH}_2$ ), 13.79 (ethyl  $\text{CH}_3$ ), 7.71 (cation  $\text{CH}_3$ ). The B- $\text{CH}_2$  signal could not be detected unambiguously but was detected indirectly using HSQC and HMBC spectra at 12.5 ppm.

HRMS (ESI):  $m/z$  Calcd for  $[\text{C}_3\text{B}_{11}\text{I}_5\text{H}_{11}]^-$ , 800.7180; found, 800.7188.

IR(KBr):  $\nu$  439, 2946, 2560, 1630, 1479, 1170, 1095, 913, 837.

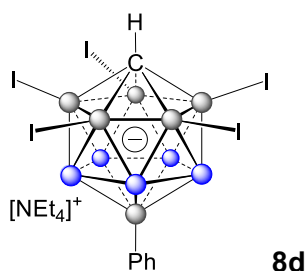

Starting from (50 mg, 0.1272 mmol) of  $[\text{NEt}_4][1\text{-COOH-12-Ph-CB}_{11}\text{H}_{10}]$  and following the procedure for the synthesis of  $[\text{NEt}_4][2,3,4,5,6\text{-I}_5\text{-CHB}_{11}\text{H}_6]$ ,  $[\text{NEt}_4][2,3,4,5,6\text{-I}_5\text{-12-Ph-CHB}_{11}\text{H}_5]$  was obtained as a white solid (103.5 mg, 0.1058 mmol, 83% yield).

$^1\text{H}\{^{11}\text{B}\}$  NMR (400 MHz, acetone- $d_6$ , 296 K):  $\delta$  7.40-7.20 (m, 2H, ArH, ortho), 7.15-7.00 (m, 3H, ArH, meta and para), 3.48(q,  $J = 7.3$  Hz, 8H, cation  $\text{CH}_2$ ), 2.71(s, 1H, cage CH), 2.98 (s, 5H, BH), 1.39 (tt,  $J = 7.3\text{Hz}, 1.9$  Hz, 12H, cation  $\text{CH}_3$ ).

$^{11}\text{B}\{^1\text{H}\}$  NMR (128 MHz, acetone- $d_6$ , 296 K):  $\delta$  8.16 (1B), -8.52 (5B), -23.67 (5B).

$^{13}\text{C}\{^1\text{H}\}$  NMR (101 MHz, acetone- $d_6$ , 296 K):  $\delta$  132.95 (ortho C), 127.78 (meta C), 127.02 (para C), 60.52 (cage C), 53.06(cation  $\text{CH}_2$ ), 7.79(cation  $\text{CH}_3$ ). The B-C(ipso) signal could not be detected unambiguously but was detected indirectly using HSQC and HMBC spectra at 143 ppm.

HRMS (ESI):  $m/z$  Calcd for  $[\text{C}_7\text{B}_{11}\text{I}_5\text{H}_{11}]^-$ , 848.7180.; found, 848.7206.

IR(KBr):  $\nu$  3439, 3254, 2924, 2537, 1586, 1464, 1306, 1154, 1033, 690, 551.

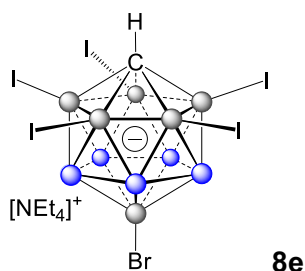

Starting from (20.3 mg, 0.0507 mmol) of  $[\text{NEt}_4][1\text{-COOH-12-Br-CB}_{11}\text{H}_{10}]$  and following the procedure for the synthesis of  $[\text{NEt}_4][2,3,4,5,6\text{-I}_5\text{-CHB}_{11}\text{H}_6]$ ,  $[\text{NEt}_4][2,3,4,5,6\text{-I}_5\text{-12-Br-CHB}_{11}\text{H}_5]$  was obtained as a white solid after recrystallization from hot methanol (0.2 mL) (38.5 mg, 0.0393 mmol, 78% yield). In this case the co-solvent was 24% HOAc instead of 12%  $\text{H}_2\text{O}$ .

$^1\text{H}\{^{11}\text{B}\}$  NMR (400 MHz, acetonitrile- $d_3$ , 296 K):  $\delta$  3.18 (q,  $J = 7.3$  Hz, 8H, cation  $\text{CH}_2$ ), 3.10 (s, 1H, cage CH), 3.01 (s, 1H, BH), 1.24 (tt,  $J = 7.3$  Hz, 1.9 Hz, 12H, cation  $\text{CH}_3$ ).

$^{11}\text{B}\{^1\text{H}\}$  NMR (160 MHz, acetone- $d_6$ , 296 K):  $\delta$  1.20 (1B), -8.45 (5B), -24.42 (5B).

$^{13}\text{C}\{^1\text{H}\}$  NMR (101 MHz, acetone- $d_6$ , 296 K):  $\delta$  58.06 (cage C), 53.03 (cation  $\text{CH}_2$ ), 7.71 (cation  $\text{CH}_3$ ).

HRMS (ESI):  $m/z$  Calcd for  $[\text{CB}_{11}\text{I}_5\text{BrH}_6]^-$ , 850.5973; found, 850.6001

IR(KBr):  $\nu$  3450, 2977, 2566, 1795, 1630, 1481, 1170, 1023, 998, 890, 837, 786, 742.

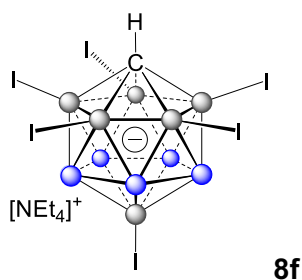

Starting from (50.1 mg, 0.113 mmol) of  $[\text{NEt}_4][1\text{-COOH-12-I-CB}_{11}\text{H}_{10}]$  and following the procedure for the synthesis of  $[\text{NEt}_4][2,3,4,5,6\text{-I}_5\text{-CHB}_{11}\text{H}_6]$ ,  $[\text{NEt}_4][2,3,4,5,6,12\text{-I}_6\text{-CHB}_{11}\text{H}_5]$  was obtained as a white solid after recrystallization from hot methanol (0.5 mL) (85.1 mg, 0.0828 mmol, 73% yield). In this case the co-solvent was 36% HOAc instead of 12%  $\text{H}_2\text{O}$ .

$^1\text{H}\{^{11}\text{B}\}$  NMR (400 MHz, acetone- $d_6$ , 296 K):  $\delta$  3.51 (q,  $J = 7.3$  Hz, 8H, cation  $\text{CH}_2$ ), 3.18 (s, 5H, BH), 3.06 (s, 1H, cage CH), 1.41 (tt,  $J = 7.3$  Hz, 1.9 Hz, 12H, cation  $\text{CH}_3$ ).

$^{11}\text{B}\{^1\text{H}\}$  NMR (128 MHz, acetone- $d_6$ , 296 K):  $\delta$  -7.87 (5B), -15.29 (1B), -23.56 (5B).

$^{13}\text{C}\{^1\text{H}\}$  NMR (101 MHz, acetone- $d_6$ , 296 K):  $\delta$  62.20 (cage C), 53.03 (cation  $\text{CH}_2$ ), 7.71 (cation  $\text{CH}_3$ ).

HRMS (ESI):  $m/z$  Calcd for  $[\text{CB}_{11}\text{I}_6\text{H}_6]^-$ , 898.5834; found, 898.5856.

IR(KBr):  $\nu$  3431, 2924, 2567, 1657, 1480, 1391, 1103, 913, 836, 782.

### Proposed mechanism for the penta-iodination

A plausible mechanism for the penta-iodination is displayed in Figure S4. Binding of the carboxylate group of  $[\text{NEt}_4][1\text{-COOH-12-X-CB}_{11}\text{H}_{10}]$  ( $X = \text{H, Me, Et, Ph, I, Br}$ ) to Pd(II) affords the initial intermediate **IM-a**. Cyclometalation–deprotonation then gives palladacycle **IM-Pd** with a direct B–Pd bond. Intermediate **IM-b** is formed by NIS insertion, which is followed by elimination to furnish complex **IM-a'**. Then succinimide leaves the cycle, and the Pd center activates a geminal or adjacent B–H position. Subsequent iodination steps follow in a similar manner. Finally, the carboxylate group is eliminated as  $\text{CO}_2$ , and Pd(II) combines with another  $[\text{NEt}_4][1\text{-COOH-12-X-CB}_{11}\text{H}_{10}]$  to enter the next cycle.

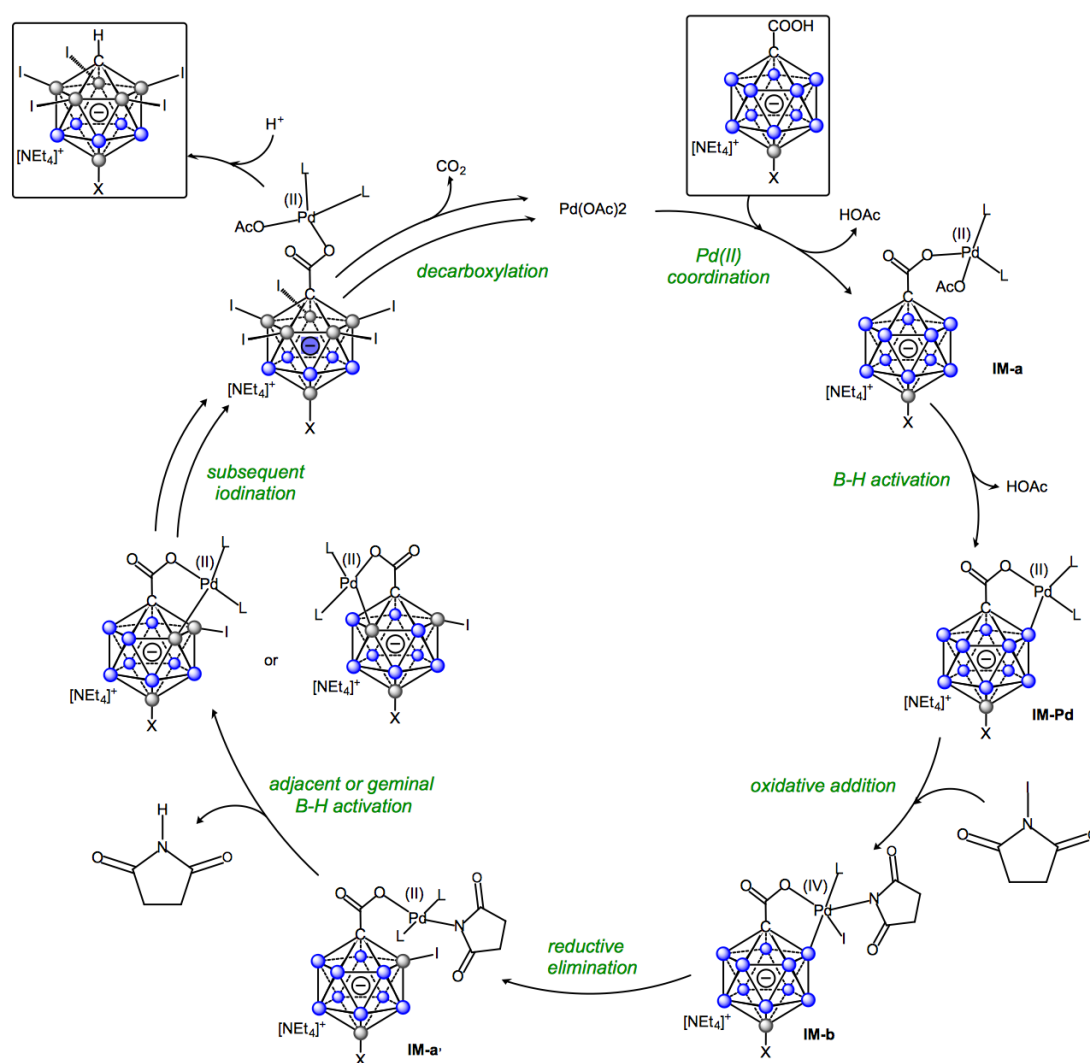

**Figure S4.** Proposed mechanism for the five-fold B-H activation/B-I coupling cascade; L=solvent molecule or  $\text{AcO}^-$  (blue spheres = BH, gray spheres = B).



### 3 X-ray Crystallography

#### Crystal structure of [NEt<sub>4</sub>][2,3,4,5,6-I<sub>5</sub>-CHB<sub>11</sub>H<sub>6</sub>] (CCDC 2247602)

[NEt<sub>4</sub>][2,3,4,5,6-I<sub>5</sub>-CHB<sub>11</sub>H<sub>6</sub>] (20 mg, 0.018 mmol) was dissolved in boiling methanol (0.2 mL) in a 2.5 mL glass vial. The resulting colorless solution was slowly cooled down to 25 °C and then placed in a refrigerator at 13 °C. Within 12 h, single crystals suitable for X-ray diffraction were obtained.

---

|                                                               |                       |                       |               |
|---------------------------------------------------------------|-----------------------|-----------------------|---------------|
| Bond precision:                                               | C-C = 0.0077 Å        | Wavelength=0.71073    |               |
| Cell:                                                         | a=9.3682 (3)          | b=11.1316 (3)         | c=25.1118 (9) |
|                                                               | alpha=90              | beta=92.214 (1)       | gamma=90      |
| Temperature:                                                  | 170 K                 |                       |               |
|                                                               | Calculated            | Reported              |               |
| Volume                                                        | 2616.78 (14)          | 2616.78 (14)          |               |
| Space group                                                   | P 21/c                | P 1 21/c 1            |               |
| Hall group                                                    | -P 2ybc               | -P 2ybc               |               |
| Moiety formula                                                | C H7 B11 I5, C8 H20 N | C H7 B11 I5, C8 H20 N |               |
| Sum formula                                                   | C9 H27 B11 I5 N       | C9 H27 B11 I5 N       |               |
| Mr                                                            | 902.73                | 902.72                |               |
| Dx, g cm <sup>-3</sup>                                        | 2.291                 | 2.291                 |               |
| Z                                                             | 4                     | 4                     |               |
| Mu (mm <sup>-1</sup> )                                        | 5.941                 | 5.941                 |               |
| F000                                                          | 1632.0                | 1632.0                |               |
| F000'                                                         | 1623.02               |                       |               |
| h, k, lmax                                                    | 12, 14, 32            | 12, 14, 32            |               |
| Nref                                                          | 5774                  | 5771                  |               |
| Tmin, Tmax                                                    | 0.211, 0.552          | 0.301, 0.746          |               |
| Tmin'                                                         | 0.085                 |                       |               |
| Correction method= # Reported T Limits: Tmin=0.301 Tmax=0.746 |                       |                       |               |
| AbsCorr = MULTI-SCAN                                          |                       |                       |               |
| Data completeness=                                            | 0.999                 | Theta(max)= 27.116    |               |
| R(reflections)=                                               | 0.0289 ( 5446)        | wR2(reflections)=     |               |
| S =                                                           | 1.110                 | 0.0649 ( 5771)        |               |
|                                                               | Npar= 239             |                       |               |

---

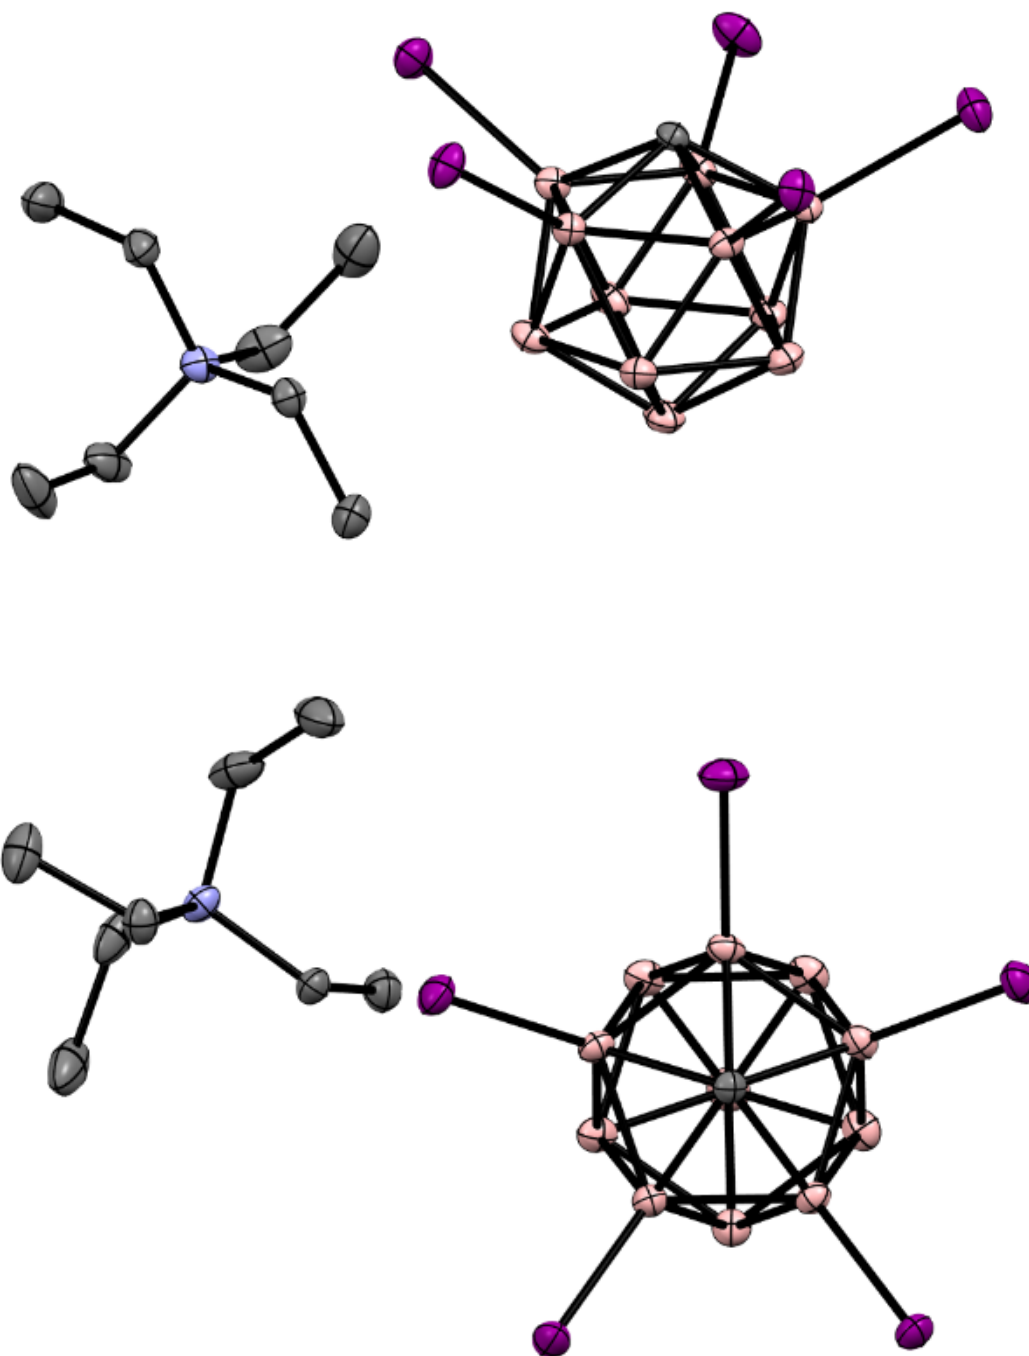

**Figure S5.** ORTEP representation of [NEt<sub>4</sub>][2,3,4,5,6-I<sub>5</sub>-CHB<sub>11</sub>H<sub>6</sub>] (top: side view; bottom: view along C(cage)-B12 axis); hydrogen atoms are omitted for clarity; 30% displacement ellipsoids.

### Crystal structure of [NEt<sub>4</sub>][2,3,4,5,6-I<sub>5</sub>-12-Ph-CHB<sub>11</sub>H<sub>5</sub>] (CCDC 2247603)

[NEt<sub>4</sub>][2,3,4,5,6-I<sub>5</sub>-12-Ph-CHB<sub>11</sub>H<sub>5</sub>] (20 mg, 0.018 mmol) was dissolved in boiling methanol (0.2 mL) in a 2.5 mL glass vial. The resulting colorless solution was slowly cooled down to 25 °C and then placed in a refrigerator at 13 °C. Within 12 h, single crystals suitable for X-ray diffraction were obtained.

---

|                                                               |                         |                         |                  |
|---------------------------------------------------------------|-------------------------|-------------------------|------------------|
| Bond precision:                                               | C-C = 0.0081 Å          | Wavelength=0.71073      |                  |
| Cell:                                                         | a=9.8044 (5)            | b=11.8241 (6)           | c=13.6777 (7)    |
|                                                               | alpha=100.782 (2)       | beta=98.898 (2)         | gamma=94.691 (2) |
| Temperature:                                                  | 296 K                   |                         |                  |
|                                                               | Calculated              | Reported                |                  |
| Volume                                                        | 1528.85 (14)            | 1528.85 (14)            |                  |
| Space group                                                   | P -1                    | P -1                    |                  |
| Hall group                                                    | -P 1                    | -P 1                    |                  |
| Moiety formula                                                | C7 H11 B11 I5, C8 H20 N | C7 H11 B11 I5, C8 H20 N |                  |
| Sum formula                                                   | C15 H31 B11 I5 N        | C15 H31 B11 I5 N        |                  |
| Mr                                                            | 978.82                  | 978.82                  |                  |
| Dx, g cm <sup>-3</sup>                                        | 2.126                   | 2.126                   |                  |
| Z                                                             | 2                       | 2                       |                  |
| Mu (mm <sup>-1</sup> )                                        | 5.093                   | 5.093                   |                  |
| F000                                                          | 896.0                   | 896.0                   |                  |
| F000'                                                         | 891.52                  |                         |                  |
| h, k, lmax                                                    | 12, 15, 17              | 12, 15, 17              |                  |
| Nref                                                          | 6768                    | 6760                    |                  |
| Tmin, Tmax                                                    | 0.135, 0.516            | 0.498, 0.746            |                  |
| Tmin'                                                         | 0.102                   |                         |                  |
| Correction method= # Reported T Limits: Tmin=0.498 Tmax=0.746 |                         |                         |                  |
| AbsCorr = MULTI-SCAN                                          |                         |                         |                  |
| Data completeness=                                            | 0.999                   | Theta(max)= 27.124      |                  |
| R(reflections)=                                               | 0.0329 ( 6176)          | wR2(reflections)=       |                  |
| S =                                                           | 1.026                   | 0.0742 ( 6760)          |                  |
|                                                               | Npar= 293               |                         |                  |

---

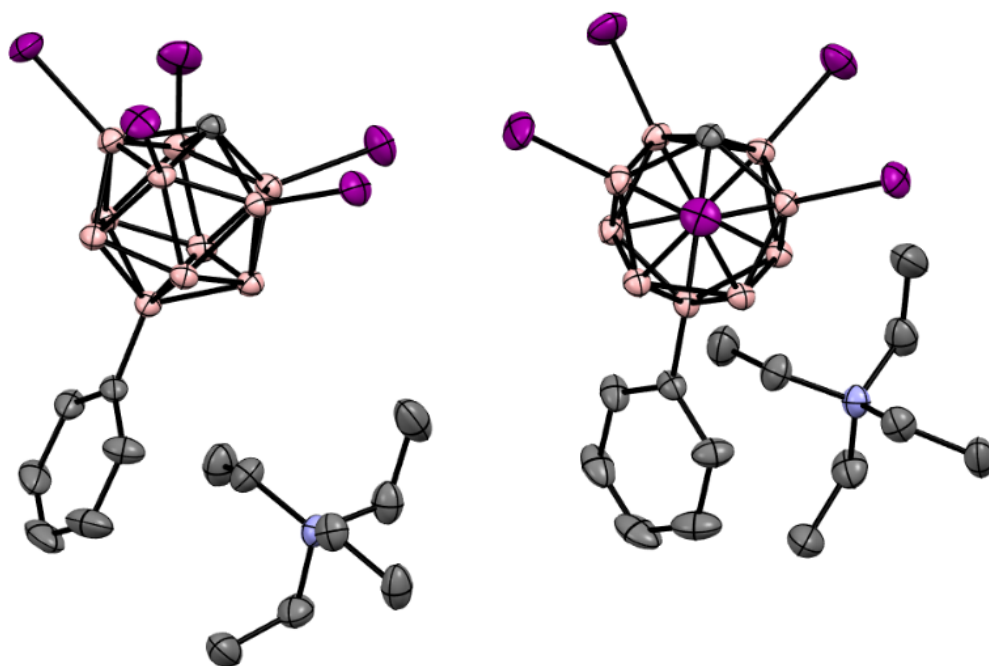

**Figure S6.** ORTEP representation of [NEt<sub>4</sub>][2,3,4,5,6-I<sub>5</sub>-12-Ph-CHB<sub>11</sub>H<sub>5</sub>] (left: side view; right: view along B<sub>2</sub>-B<sub>9</sub> axis); hydrogen atoms are omitted for clarity; 30% displacement ellipsoids.

### Crystal structure of [NEt<sub>4</sub>][2,3,4,5,6,12-I<sub>6</sub>-CHB<sub>11</sub>H<sub>5</sub>] (CCDC 2247604)

[NEt<sub>4</sub>][2,3,4,5,6-I<sub>5</sub>-12-I-CHB<sub>11</sub>H<sub>5</sub>] (20 mg, 0.018 mmol) was dissolved in boiling methanol (1.0 mL) in a 2.5 mL glass vial. The resulting colorless solution was slowly cool down to RT. The resulting colorless solution was slowly cooled down to 25 °C and then placed in a refrigerator at 13 °C. Within 12 h, single crystals suitable for X-ray diffraction were obtained.

---

|                        |                                            |                       |               |
|------------------------|--------------------------------------------|-----------------------|---------------|
| Bond precision:        | B- B = 0.0129 A                            | Wavelength=0.71073    |               |
| Cell:                  | a=9.4164(6)                                | b=16.9039(12)         | c=17.2551(12) |
|                        | alpha=90                                   | beta=90.216(2)        | gamma=90      |
| Temperature:           | 170 K                                      |                       |               |
|                        | Calculated                                 | Reported              |               |
| Volume                 | 2746.5(3)                                  | 2746.5(3)             |               |
| Space group            | P 21/c                                     | P 1 21/c 1            |               |
| Hall group             | -P 2ybc                                    | -P 2ybc               |               |
| Moiety formula         | C H6 B11 I6, C8 H20 N                      | C H6 B11 I6, C8 H20 N |               |
| Sum formula            | C9 H26 B11 I6 N                            | C9 H26 B11 I6 N       |               |
| Mr                     | 1028.62                                    | 1028.62               |               |
| Dx, g cm <sup>-3</sup> | 2.488                                      | 2.488                 |               |
| Z                      | 4                                          | 4                     |               |
| Mu (mm <sup>-1</sup> ) | 6.786                                      | 6.786                 |               |
| F000                   | 1840.0                                     | 1840.0                |               |
| F000'                  | 1829.24                                    |                       |               |
| h, k, lmax             | 13, 24, 24                                 | 13, 24, 24            |               |
| Nref                   | 8426                                       | 8376                  |               |
| Tmin, Tmax             | 0.672, 0.816                               | 0.629, 0.746          |               |
| Tmin'                  | 0.538                                      |                       |               |
| Correction method=     | # Reported T Limits: Tmin=0.629 Tmax=0.746 |                       |               |
| AbsCorr =              | MULTI-SCAN                                 |                       |               |
| Data completeness=     | 0.994                                      | Theta(max)=           | 30.548        |
| R(reflections)=        | 0.0524( 7006)                              | wR2(reflections)=     | 0.1219( 8376) |
| S =                    | 1.093                                      | Npar=                 | 334           |

---

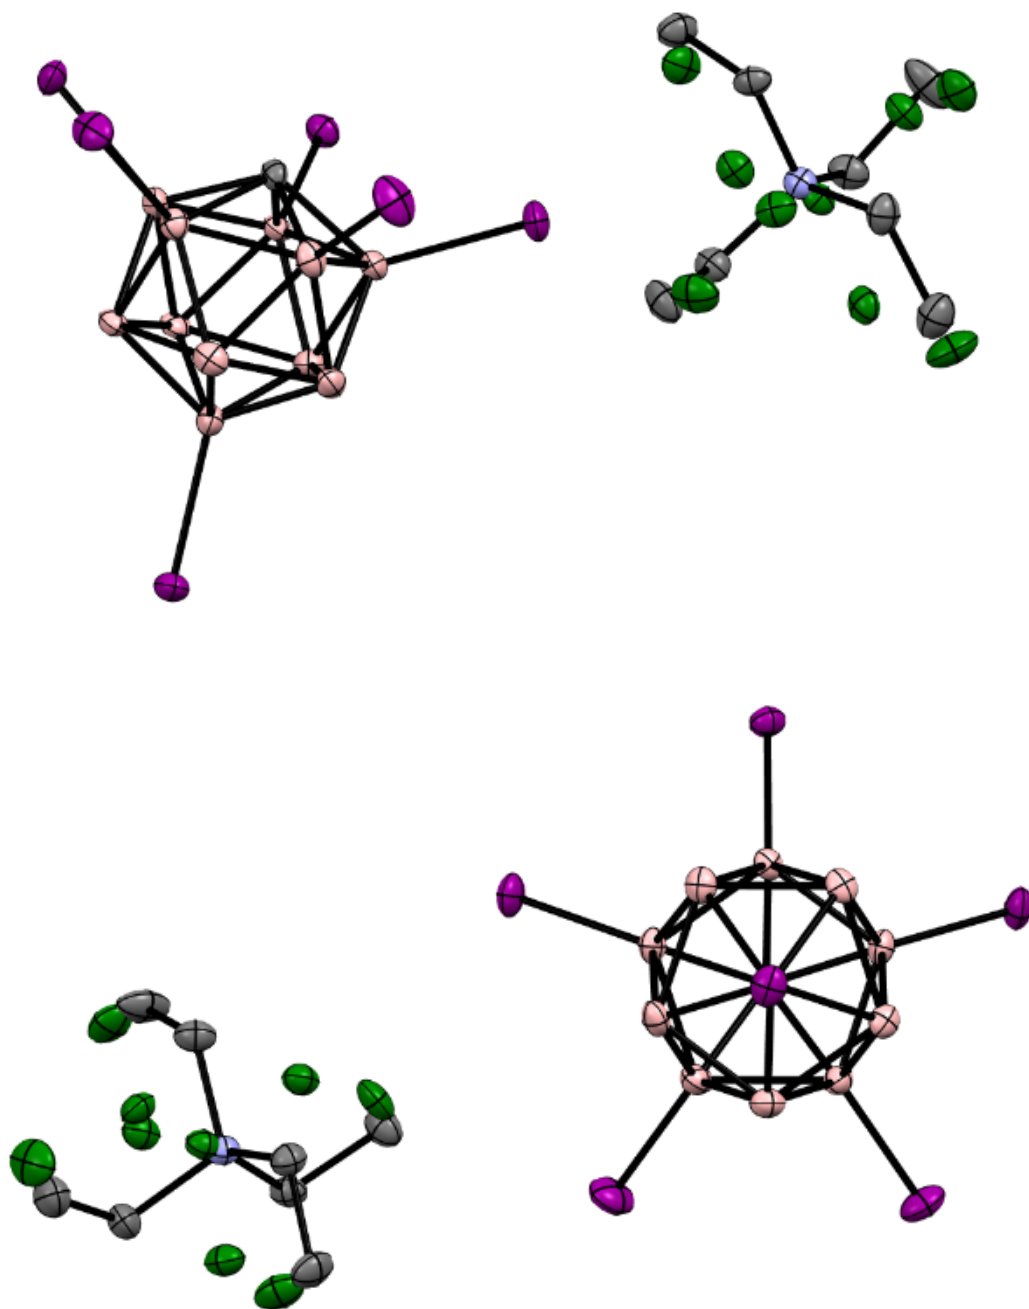

**Figure S7.** ORTEP representation of [NEt<sub>4</sub>][2,3,4,5,6,12-I<sub>6</sub>-CHB<sub>11</sub>H<sub>5</sub>] (top: side view; bottom: view along B12-C(cage) axis); hydrogen atoms are omitted for clarity; 30% displacement ellipsoids. Minor component of disordered cation shown in green.

## 4 References

- [1] Shen, Y. J.; Pan, Y. N.; Zhang, K.; Liang, X. W.; Liu, J. Y.; Spingler B.; Duttwyler, S. *Dalton Trans.* **2017**, *46*, 3135.
- [2] Himmelspach, A.; Reiss, G. J.; Finze, M. *Inorg. Chem.* **2012**, *51*, 2679–2688.
- [3] Lin, F. R.; Shen, Y. J.; Zhang, Y. B.; Sun, Y. J.; Liu, J. Y.; Duttwyler, S. *Chem. Eur. J.* **2018**, *24*, 551–555.
- [4] Shen, Y. J.; Zhang, K.; Liang, X. W.; Dontha, R.; Duttwyler, S. *Chem. Sci.* **2019**, *10*, 4177.
- [5] Grüner, B.; Janoušek, Z.; King, B. T.; Woodford, J. N.; Wang, C. H.; Vřetečka V.; Michl J. *J. Am. Chem. Soc.* **1999**, *121*, 3122–3126.

## 5 NMR Spectra, Mass Spectra and IR spectra

Displayed on p. S24–77.

Current Data Parameters  
 NAME 20230206--ICH-5-I-1H-11B  
 EXPNO 1  
 PROCNO 1

[NEt4][2,3,4,5,6-5I-CHB11H6]  
 500MHz, 1H{11B}, 6mg, 0.6mL Acetonitrile-d3\*, 296K

F2 - Acquisition Parameters  
 Date\_ 20230206  
 Time\_ 19.06  
 INSTRUM spect  
 PROBHD 5 mm PABBO 150  
 PULPROG zgpg30  
 TD 65536  
 SOLVENT CD3CN  
 NS 16  
 DS 4  
 SWH 12500.000 Hz  
 FIDRES 0.190735 Hz  
 AQ 2.6214339 sec  
 RG 161  
 DM 40.000 usec  
 DE 6.50 usec  
 TE 295.15 K  
 D1 5.00000000 sec  
 D11 0.03000000 sec  
 TDD 1

==== CHANNEL f1 =====  
 SFO1 500.1735009 MHz  
 NUCL1 1H  
 P1 12.00 usec  
 PLW1 19.00000000 W

==== CHANNEL f2 =====  
 SFO2 160.47744030 MHz  
 NUCL2 11B  
 CPDPRG2 gaup  
 PCPD2 100.00 usec  
 PLW2 95.00000000 W  
 PLW12 1.63030005 W

F2 - Processing parameters  
 SI 65536  
 SF 500.1700143 MHz  
 WDW EM  
 SSB 0  
 LB 1.00 Hz  
 GB 0  
 PC 1.00

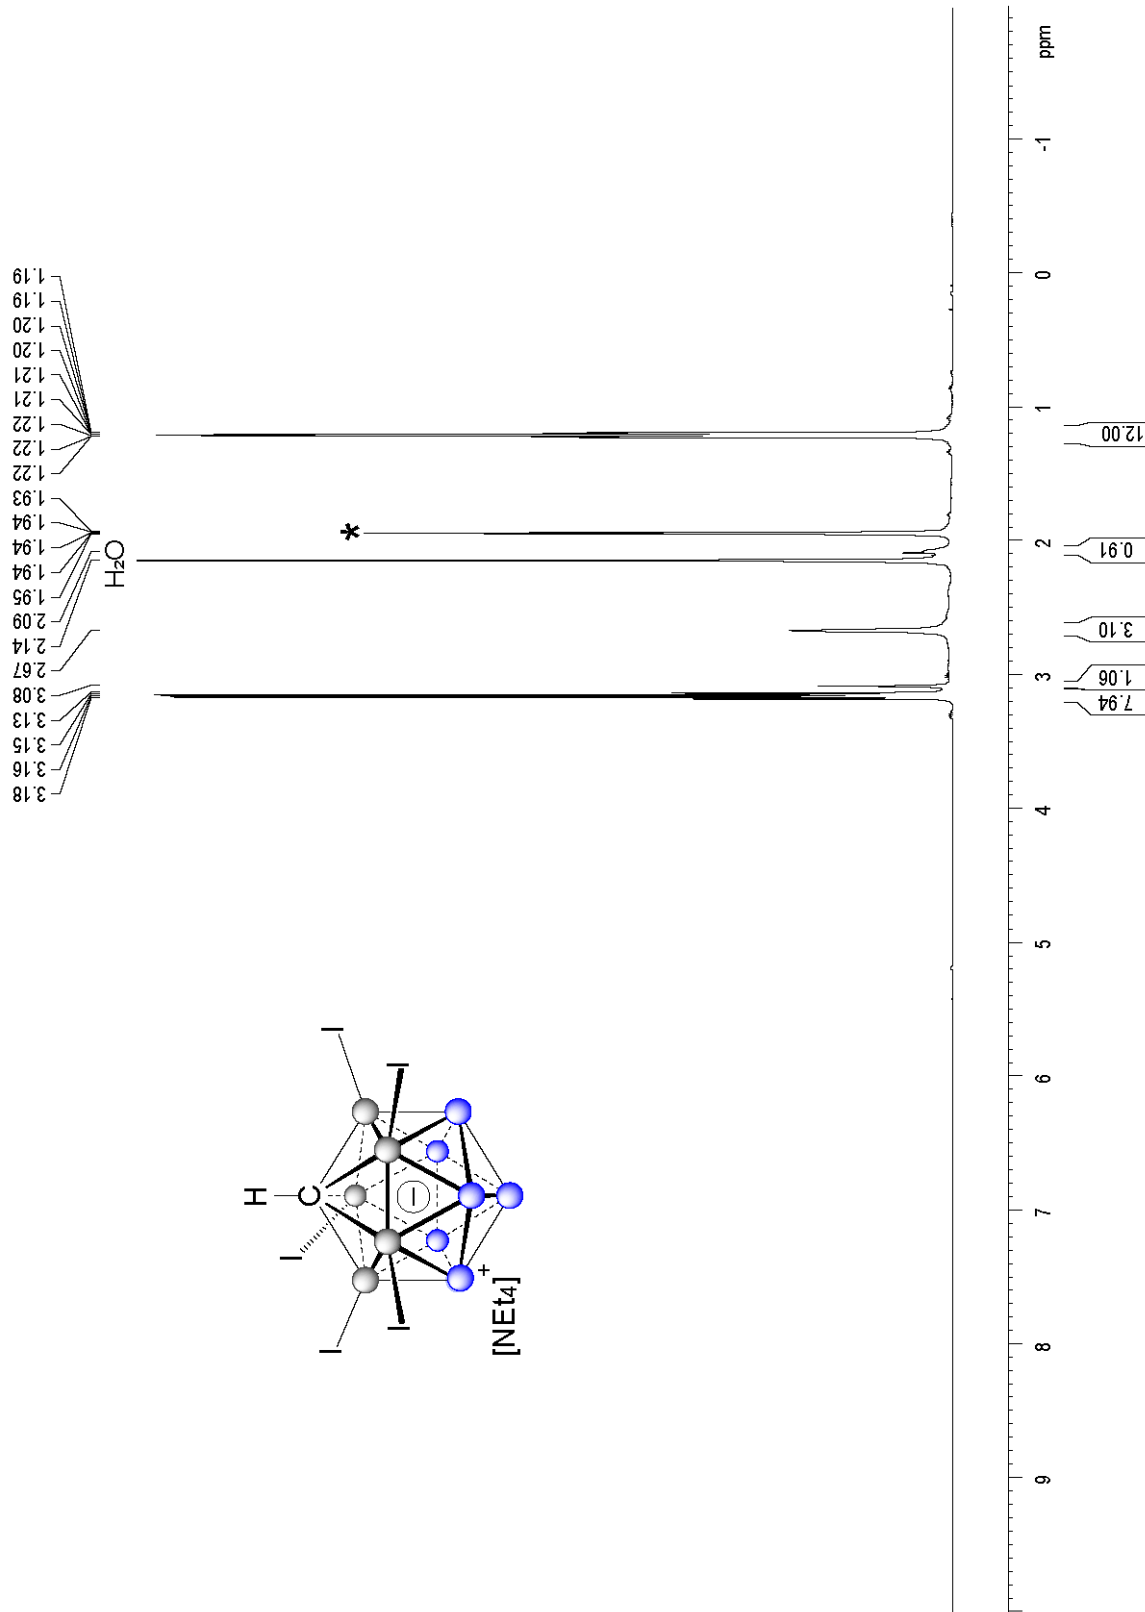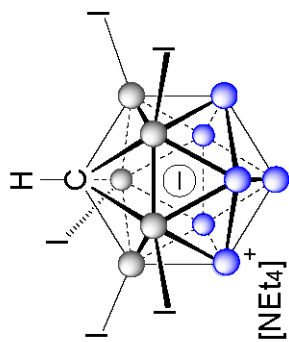



```

Current Data Parameters
NAME      11B NMR,400M,Aceton
EXPNO    2
PROCNO   1
F2 - Acquisition Parameters
Date_    20221022
Time_    18.20
INSTRUM  spect
PROBHD   5 mm PABBO BB/
PULPROG  zg
TD        65536
SOLVENT  Acetone
NS        128
DS        4
SFO1      25510.203 Hz
SFO2      10.389255 Hz
AQ        1.2885056 sec
RG        193.34
DM        19.600 usec
DE        6.50 usec
TE        295.2 K
D1        1.00000000 sec
TD0       1
===== CHANNEL f1 =====
NUC1      11B
P1        9.03 usec
PL1       52.9650050 MHz
SFO1      128.3776052 MHz
F2 - Processing parameters
SI        32768
SF        128.3776050 MHz
WDW       EM
SSB       0
LB        10.00 Hz
GB        0
PC        1.40

```

[NEt4][2,3,4,5,6-5I-CHB11H6]  
 128M, 11B NMR, 10mg, 0.6mL Acetone-d6, 296k

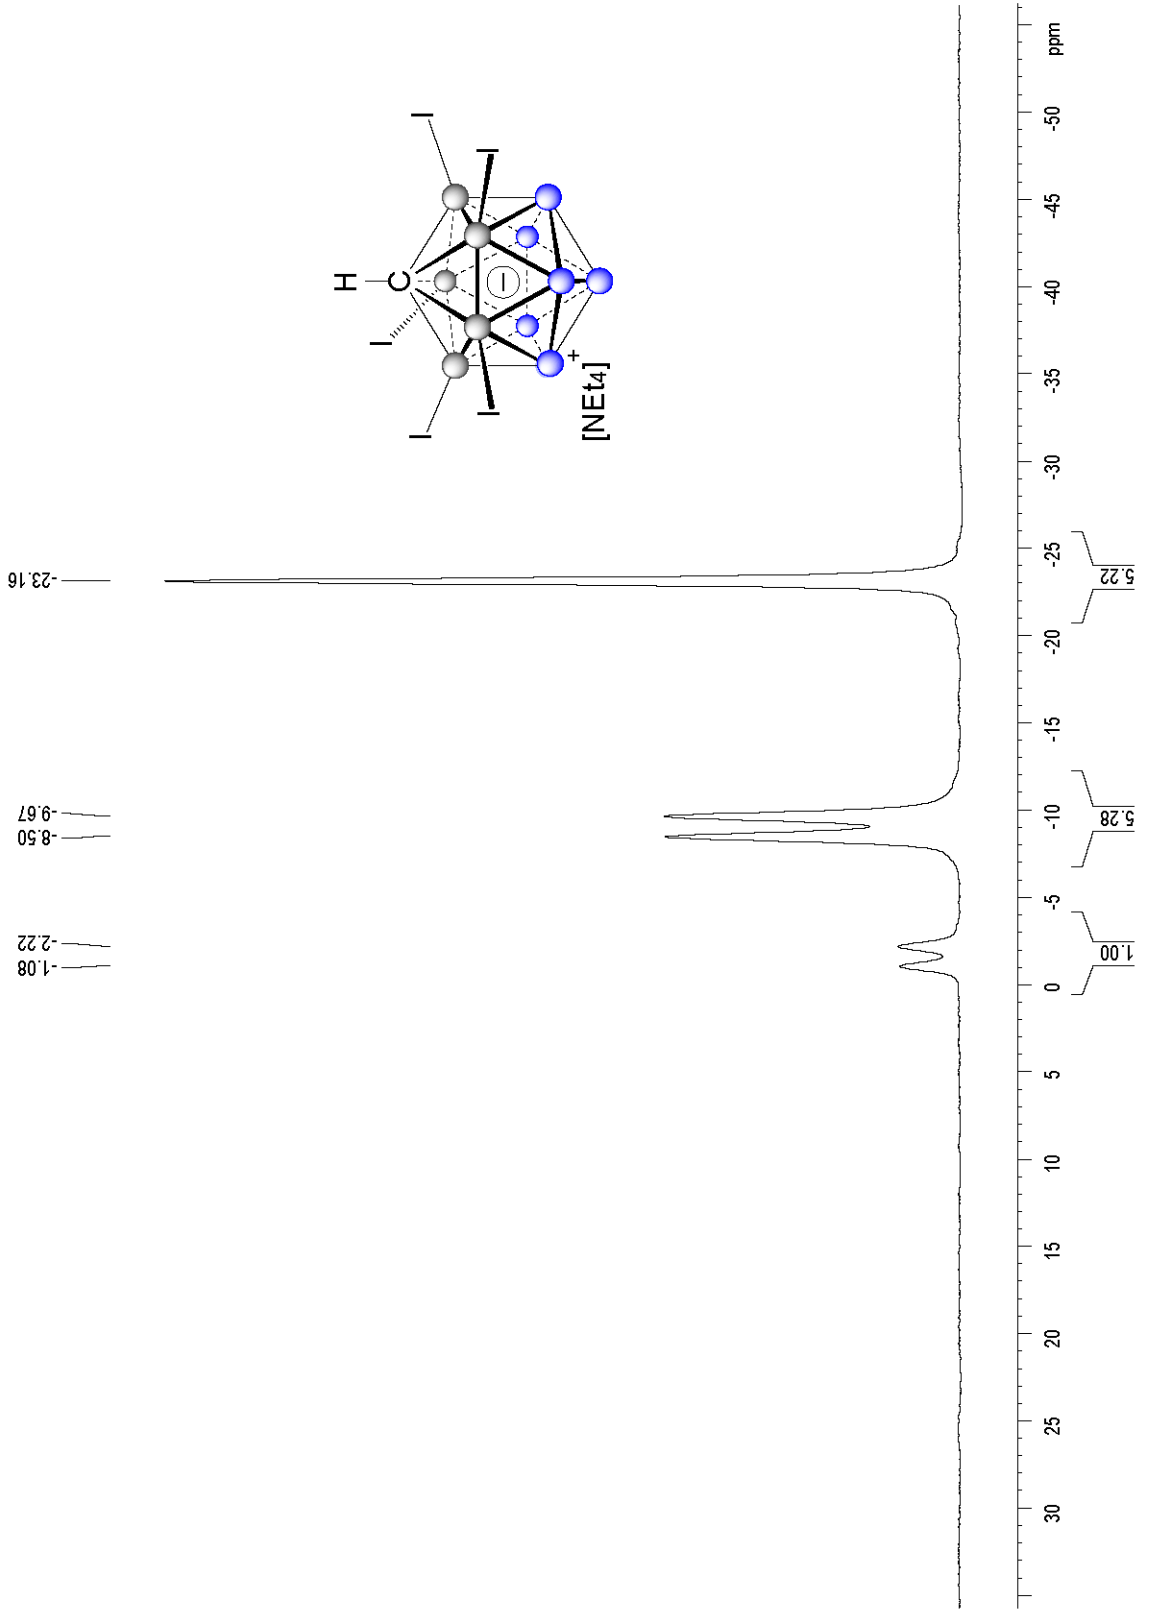

Current Data Parameters  
 NAME 11B(1H) NMR, 400M, Acetone  
 EXNO 1  
 PROCNO 1

F2 - Acquisition Parameters  
 Date\_ 20221022  
 Time\_ 16.14  
 INSTRUM spect  
 PROBHD 5 mm PABBO BE/  
 PULPROG zgpg30  
 TD 65536  
 SOLVENT Acetone  
 NS 128  
 DS 4  
 SWH 25510.203 Hz  
 FIDRES 0.388255 Hz  
 AQ 1.2845056 sec  
 RG 193.34  
 DM 19.600 usec  
 DE 6.50 usec  
 TE 296.5 K  
 D1 1.00000000 sec  
 D11 0.03000000 sec  
 TDO 1

==== CHANNEL f1 =====  
 NUCL1 11B  
 P1 9.93 usec  
 PLW1 52.96599960 W  
 SFO1 128.3776050 MHz

==== CHANNEL f2 =====  
 CPDPRG[2] waltz16  
 NUCL2 1H  
 PCPD2 80.00 usec  
 PLW2 12.50000000 W  
 PLM12 0.43945000 W  
 PLM13 0.28125000 W  
 SFO2 400.1320007 MHz

F2 - Processing parameters  
 SI 32768  
 SF 128.3776050 MHz  
 WDW EM  
 SSB 0  
 LB 10.00 Hz  
 GB 0  
 PC 1.40

[NEt4][2,3,4,5,6-5]-CHB(1H)6  
 128MHz, 11B(1H), 10mg, 0.6mL Acetone-d6\*, 296K

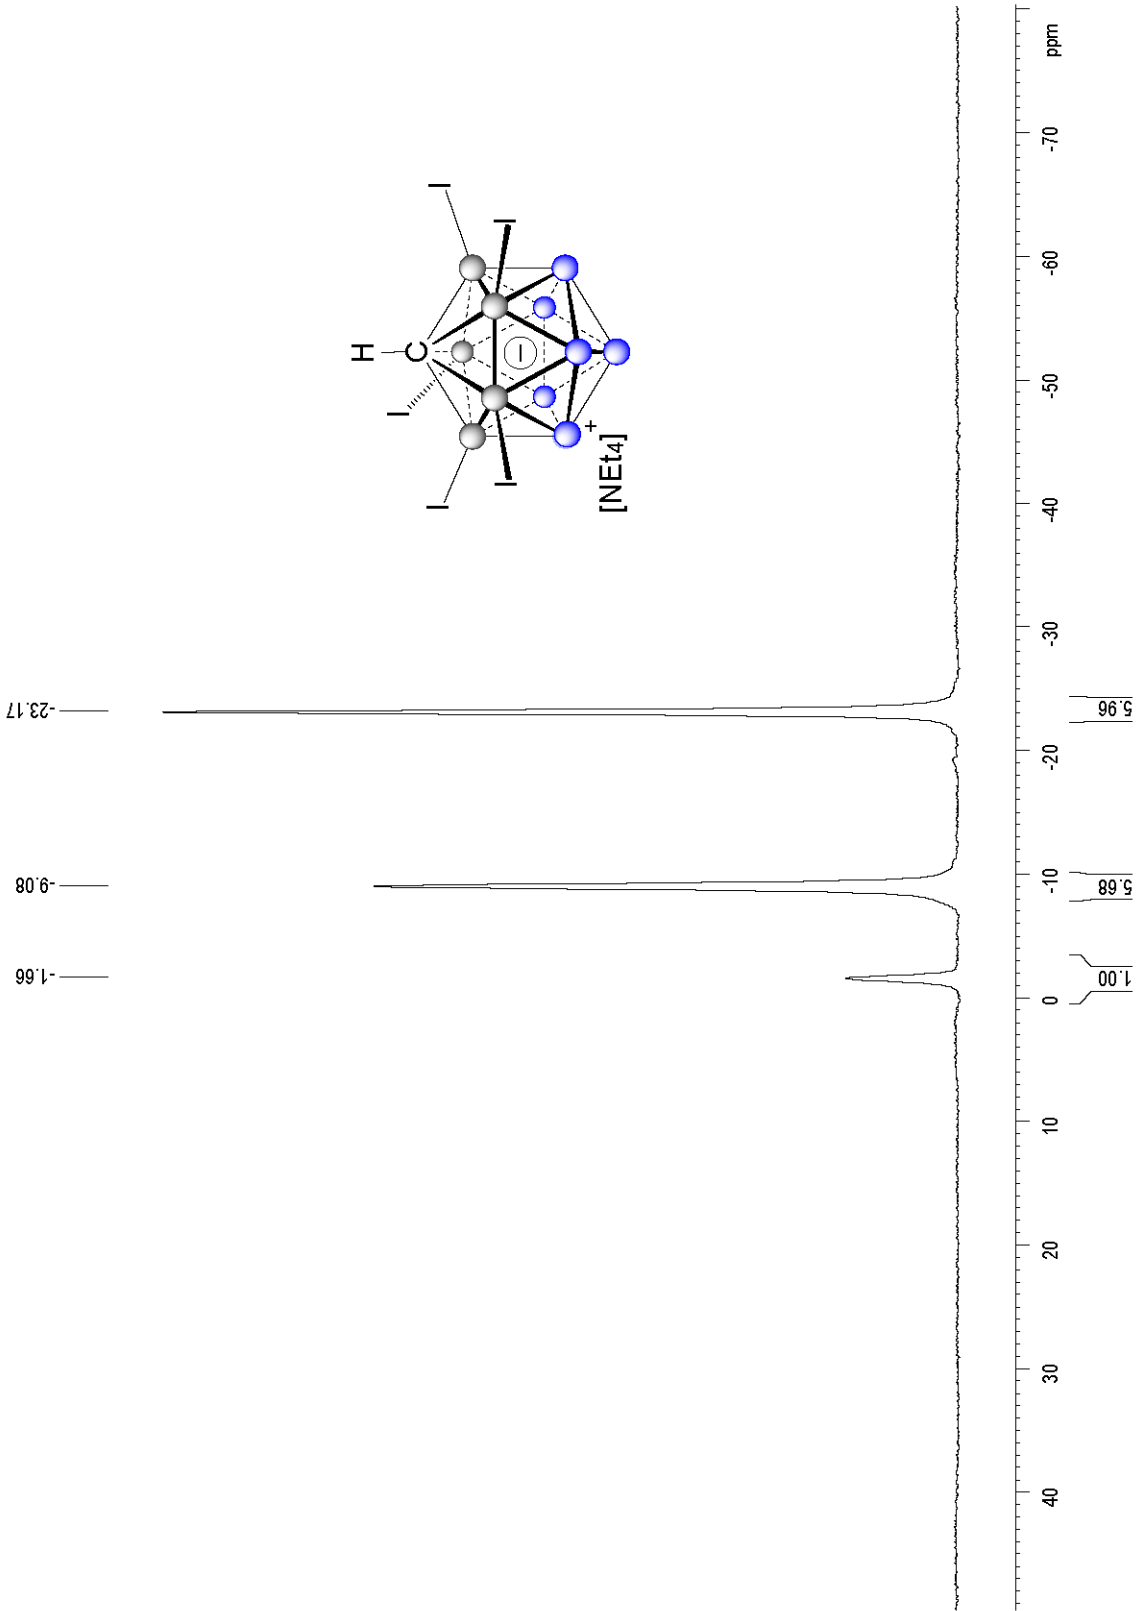

Current Data Parameters  
 NAME 13C{1H} NMR, 400M, Aceton  
 EXENO 3  
 PROCNO 1

F2 - Acquisition Parameters  
 Date\_ 20221025  
 Time 1.09  
 INSTRUM spect  
 PROBHD 5 mm PABBO BB/  
 PULPROG zgpg30  
 TD 65536  
 SOLVENT Acetone  
 NS 1024  
 DS 4  
 SWH 29761.904 Hz  
 FIDRES 0.454131 Hz  
 AQ 1.1010048 sec  
 RG 193.34  
 DM 16.800 usec  
 DE 6.50 usec  
 TE 296.6 K  
 D1 1.5000000 sec  
 D11 0.0300000 sec  
 TD0 1

==== CHANNEL f1 =====  
 NUC1 13C  
 P1 10.00 usec  
 PLW1 53.0000000 W  
 SFO1 100.6228293 MHz

==== CHANNEL f2 =====  
 CPDPRG2 waitz16  
 NUC2 1H  
 PCPD2 80.00 usec  
 PLW2 12.5000000 W  
 PLW12 0.43945000 W  
 PLW13 0.28125000 W  
 SFO2 400.1316005 MHz

F2 - Processing parameters  
 SI 32768  
 SF 100.6127842 MHz  
 WDM 0  
 SSB 0  
 LB 1.00 Hz  
 GB 0  
 PC 1.40

[NEt4][2,3,4,5,6-5I-CHB11H6]  
 101MHz, 13C{1H} NMR, 20mg, 0.6mL Acetone-d6\*, 296K

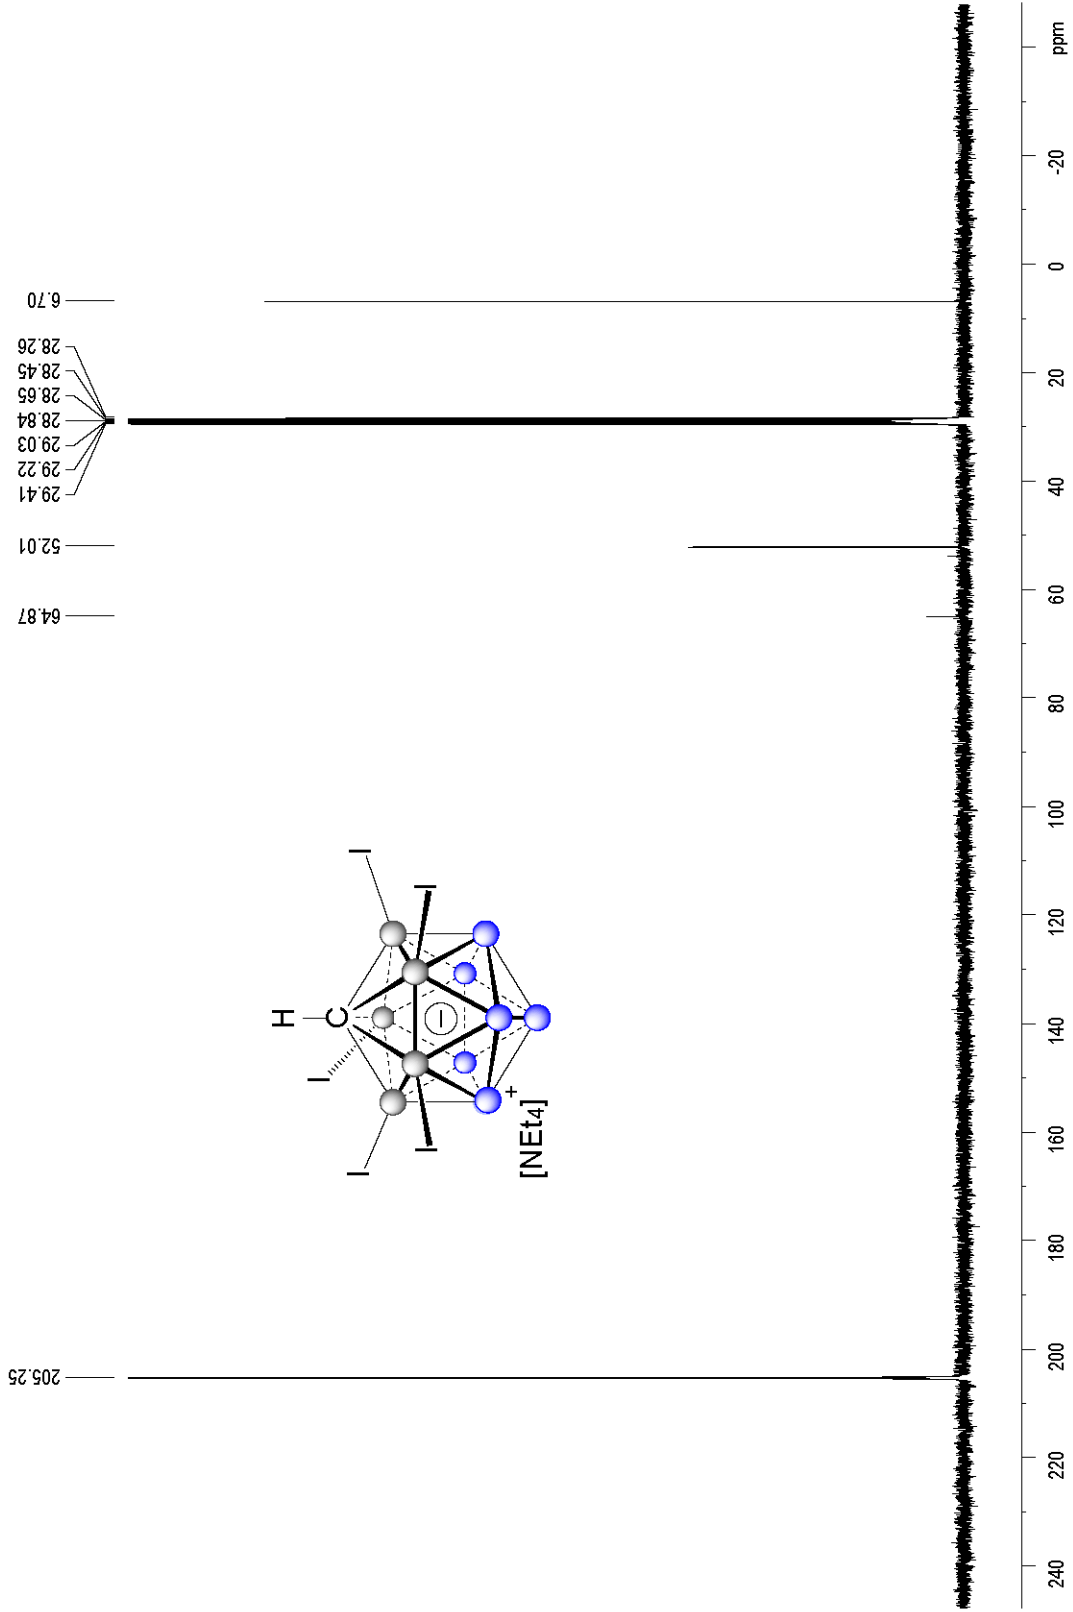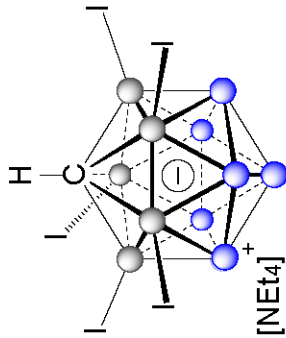

Current Data Parameters  
 NAME 400M-[Cs][2,3,4,5,6-5I  
 EXNO 2  
 PROCNO 1  
 F2 - Acquisition Parameters  
 Date\_ 20221030  
 Time 14.15  
 INSTRUM spect  
 PROBHD 5 mm PABEO.BE/  
 PULPROG zgpg30  
 TD 16384  
 SOLVENT Acetone  
 NS 16  
 DS 4  
 SWH 8012.820 Hz  
 FIDRES 0.489064 Hz  
 AQ 1.0223616 sec  
 RG 193.34  
 DM 62.400 usec  
 DE 6.50 usec  
 TE 296.3 K  
 D1 1.00000000 sec  
 D11 0.03000000 sec  
 TDO 1

===== CHANNEL f1 =====  
 NUC1 1H  
 P1 15.00 usec  
 PLW1 12.50000000 W  
 SFO1 400.1320007 MHz

===== CHANNEL f2 =====  
 CPDPRG2 garp4  
 NUC2 11B  
 PCDP2 90.00 usec  
 PLW2 52.96599960 W  
 PLM12 0.64477998 W  
 SFO2 128.3776050 MHz

F2 - Processing parameters  
 SI 32768  
 SF 400.1300071 MHz  
 WDW EM  
 SSB 0  
 LB 1.00 Hz  
 GB 0  
 PC 1.40

[Cs][2,3,4,5,6-5I-CHB11H6]  
 400M, 1H{1B} NMR, 20mg, Acetone-d6\*, 296K

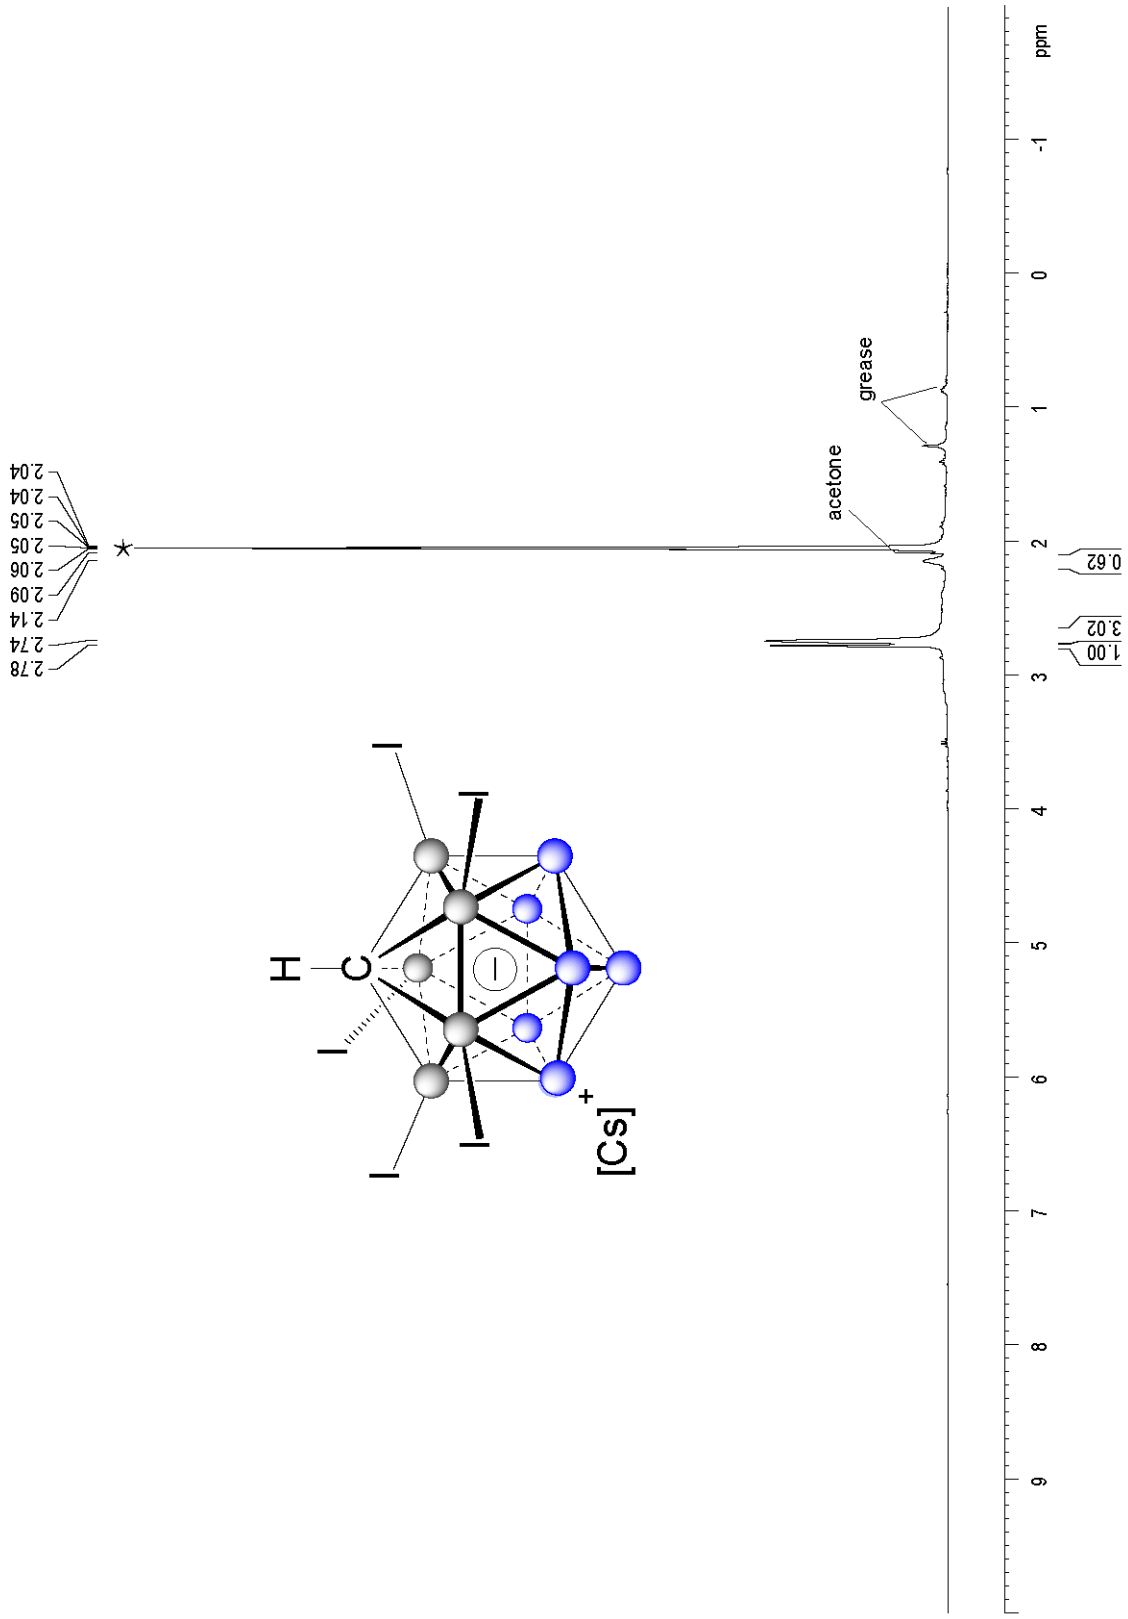

Current Data Parameters  
 NAME 400M-[Cs][2,3,4,5,6-  
 EXNO 4  
 PROCNO 1  
 F2 - Acquisition Parameters  
 Date\_ 20221030  
 Time\_ 14:28  
 INSTRUM spect  
 PROBHD 5 mm FAPBO BB/  
 PULPROG zg  
 TD 65536  
 SOLVENT Acetone  
 NS 128  
 DS 4  
 SWH 25510.203 Hz  
 FIDRES 0.389255 Hz  
 AQC 1.2845056 sec  
 RG 193.34  
 DW 19.600 usec  
 DE 6.50 usec  
 TE 296.1 K  
 D1 1.00000000 sec  
 TDO 1

===== CHANNEL f1 =====  
 NUC1 11B  
 P1 9.93 usec  
 PLW1 52.96599560 W  
 SF01 128.3776052 MHz

F2 - Processing parameters  
 SI 32768  
 SF 128.3776050 MHz  
 WDW EM  
 SSB 0  
 LB 1.00 Hz  
 GB 0  
 PC 1.40

[Cs][2,3,4,5,6-5I-CHB11H6]  
 128M, 11B NMR, 20mg, Acetone-d6\*, 296K

Chemical shift values (ppm):  
 -1.09  
 -2.19  
 -8.48  
 -9.66  
 -23.17

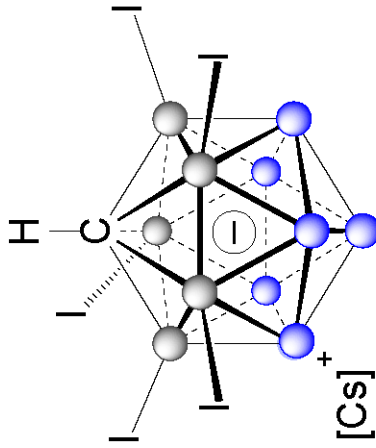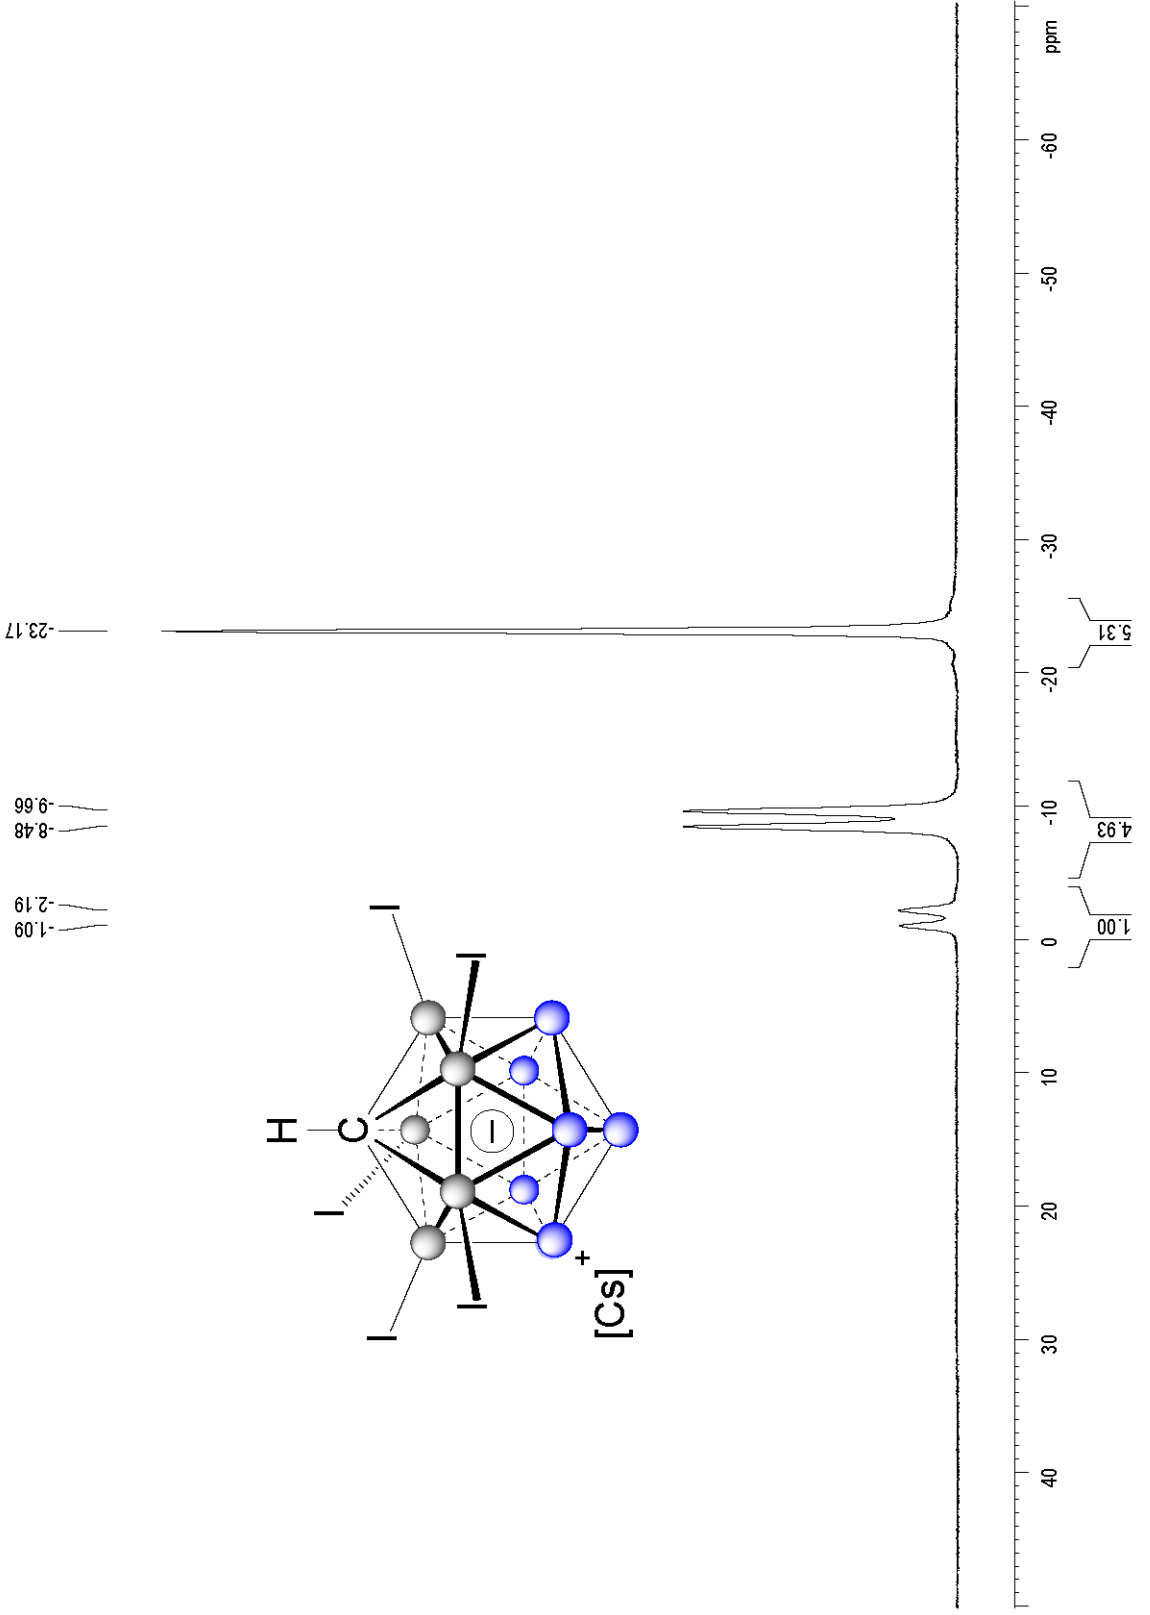

Current Data Parameters  
 NAME 400M-[Cs]2,3,4,5,6-  
 EXNO 3  
 PROCNO 1

[Cs][2,3,4,5,6-5I-CHB11H6]  
 128M, 11B{1H} NMR, 20mg, Acetone-d6\*, 296K

F2 - Acquisition Parameters  
 Date\_ 20221030  
 Time\_ 14.22  
 INSTRUM spect  
 PROBHD 5 mm PABBO BB/  
 PULPROG zgpg30  
 TD 65536  
 SOLVENT Acetone  
 NS 128  
 DS 4  
 SWH 25510.203 Hz  
 FIDRES 0.389235 Hz  
 AQ 1.2845056 sec  
 RG 193.34  
 DM 19.600 usec  
 DE 6.50 usec  
 TE 296.9 K  
 D1 1.0000000 sec  
 D11 0.0300000 sec  
 TDO 1

===== CHANNEL f1 =====  
 NUC1 11B  
 P1 9.93 usec  
 PLW1 52.96599560 W  
 SF01 128.3776050 MHz

===== CHANNEL f2 =====  
 CPDPRG2 waltz16  
 NUC2 1H  
 PCPD2 80.00 usec  
 PLW2 12.50000000 W  
 PLW12 0.43945000 W  
 PLW13 0.28125000 W  
 SF02 400.1320007 MHz

F2 - Processing parameters  
 SI 32768  
 SF 128.3776050 MHz  
 WDW EM  
 SSB 0  
 LB 1.00 Hz  
 GB 0  
 PC 1.40

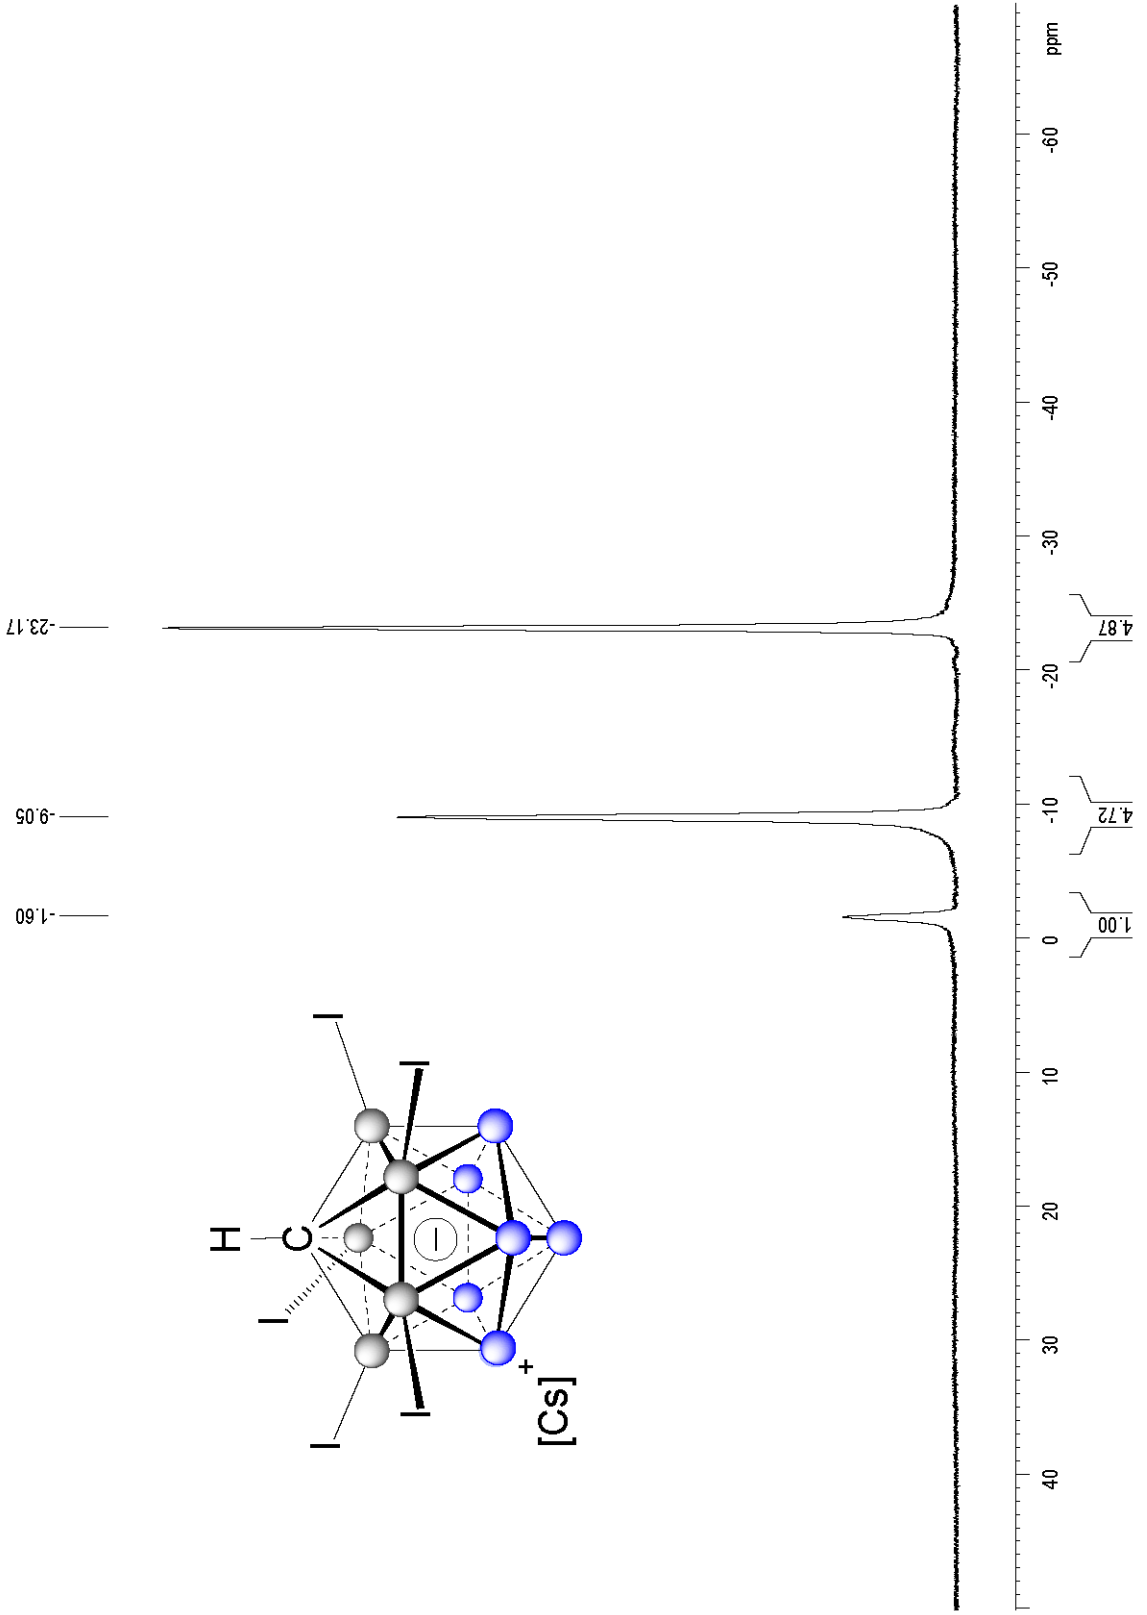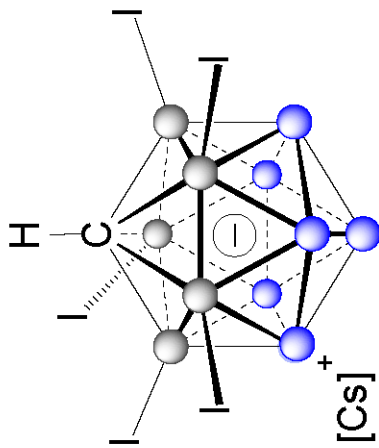

Current Data Parameters  
 NAME 400M-[CS][2,3,4,5,6-  
 EXPNO 5  
 PROCNO 1  
 F2 - Acquisition Parameters  
 Date\_ 20221030  
 Time 14.32  
 INSTRUM spect  
 PROBHD 5 mm PABBO BB/  
 PULPROG zgpg30  
 TD 65536  
 SOLVENT Acetone  
 NS 512  
 DS 4  
 SWH 29761.904 Hz  
 FIDRES 0.454131 Hz  
 AQ 1.1010048 sec  
 RG 193.34  
 DM 16.800 usec  
 DE 6.50 usec  
 TE 296.8 K  
 D1 1.50000000 sec  
 D11 0.03000000 sec  
 TDO 1

==== CHANNEL f1 =====  
 NUC1 13C  
 P1 10.00 usec  
 PLW1 53.0000000 W  
 SFO1 100.6228293 MHz

==== CHANNEL f2 =====  
 CPDPRG2 waltz16  
 NUC2 1H  
 PCPD2 80.00 usec  
 PLW2 12.5000000 W  
 PLW12 0.43945000 W  
 PLW13 0.28125000 W  
 SFO2 400.1316005 MHz

F2 - Processing parameters  
 SI 32768  
 SF 100.6126827 MHz  
 WDM 0  
 SSB 0  
 LB 10.00 Hz  
 GB 0  
 PC 1.40

[Cs][2,3,4,5,6-5I-CHB11H6]  
 101M, 13C{1H} NMR, 20mg, Acetone-d6\*, 296K

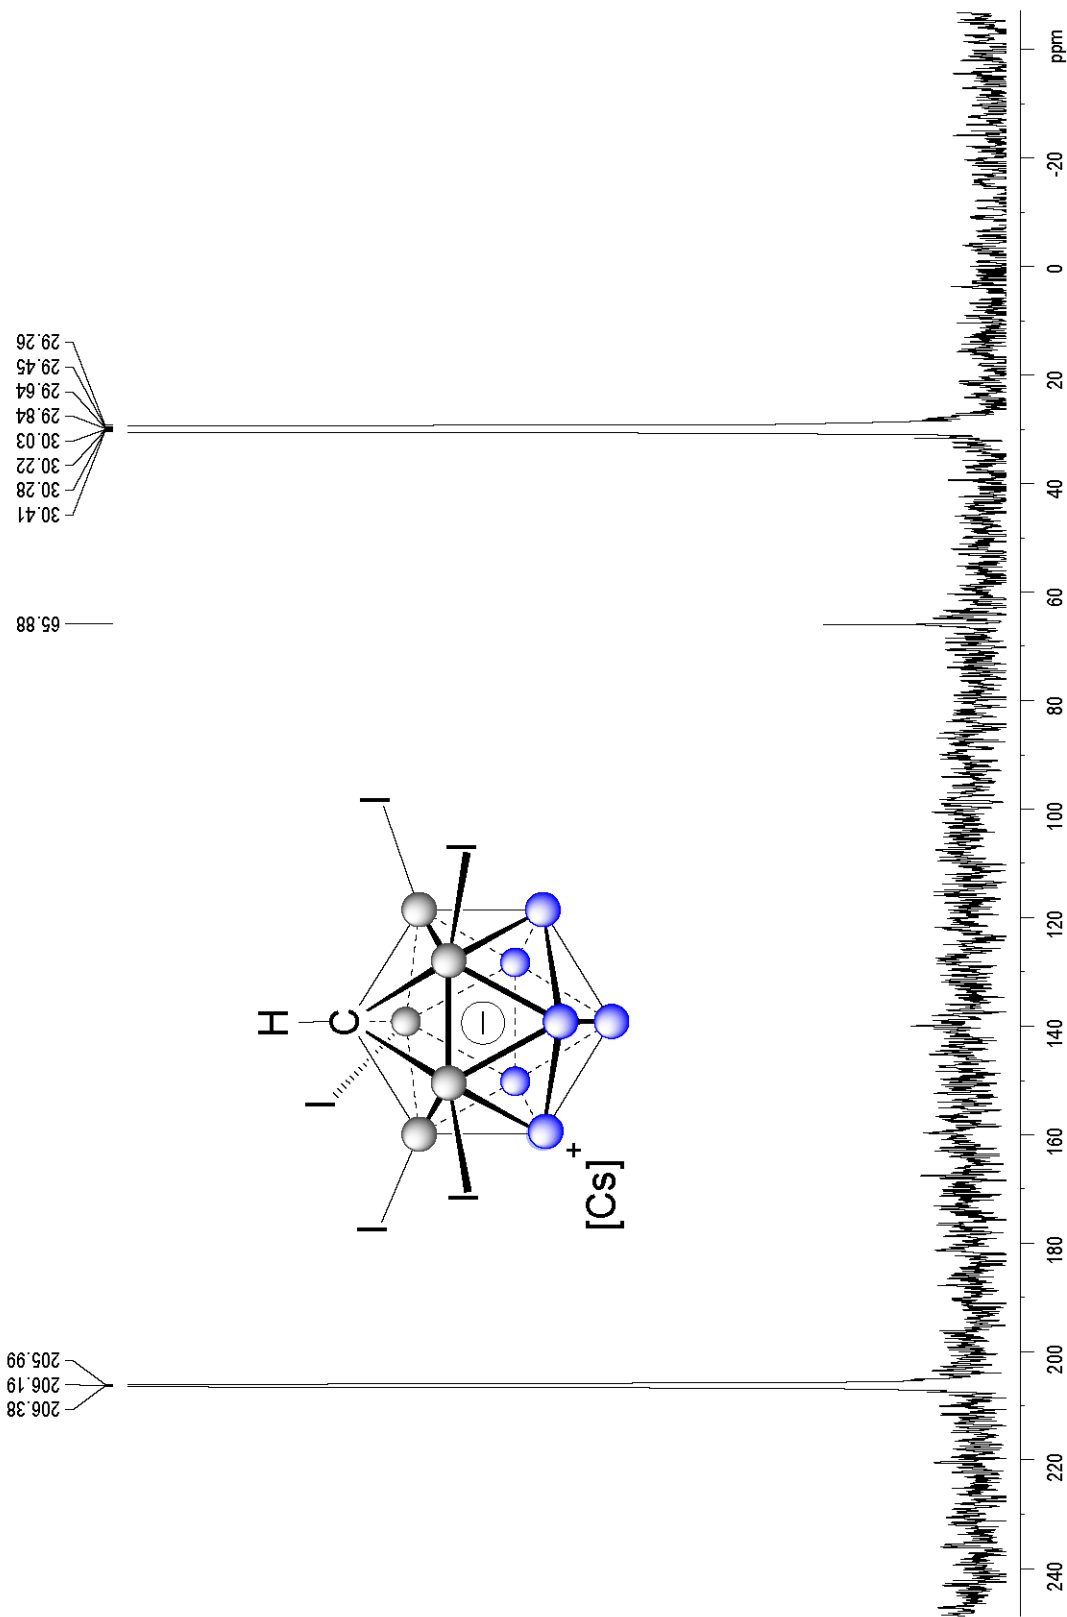

Current Data Parameters  
 NAME [Ag][2,3,4,5,6-5I-CHB11H6]  
 EXPNO 2  
 PROCNO 1

[Ag][2,3,4,5,6-5I-CHB11H6]  
 400M, 1H{11B} NMR, 20mg, Acetonitrile-d3\*, 296K

F2 - Acquisition Parameters  
 Date\_ 20221031  
 Time 20.48  
 INSTRUM Spect  
 PROBHD 5 mm PABBO BB/  
 PULPROG zgpg30  
 ID 16384  
 SOLVENT CD3CN  
 NS 16  
 DS 4  
 SMH 8012.820 Hz  
 FIDRES 0.489064 Hz  
 AQ 1.0223616 sec  
 RG 193.34  
 DW 62.400 usec  
 DE 6.50 usec  
 TE 296.3 K  
 D1 1.00000000 sec  
 D11 0.03000000 sec  
 TDO 1

==== CHANNEL f1 =====  
 NUC1 1H  
 P1 15.00 usec  
 PLW1 12.5000000 W  
 SFO1 400.1320007 MHz  
 ===== CHANNEL f2 =====  
 CDEPRG12 gairp4  
 NUC2 11B  
 P2 90.00 usec  
 PLW2 52.9659960 W  
 PLW12 0.64477998 W  
 SFO2 128.3776050 MHz  
 F2 - Processing parameters  
 SI 32768  
 SF 400.1300116 MHz  
 MDW 0  
 SSB 0  
 LB 1.00 Hz  
 GB 0  
 FC 1.40

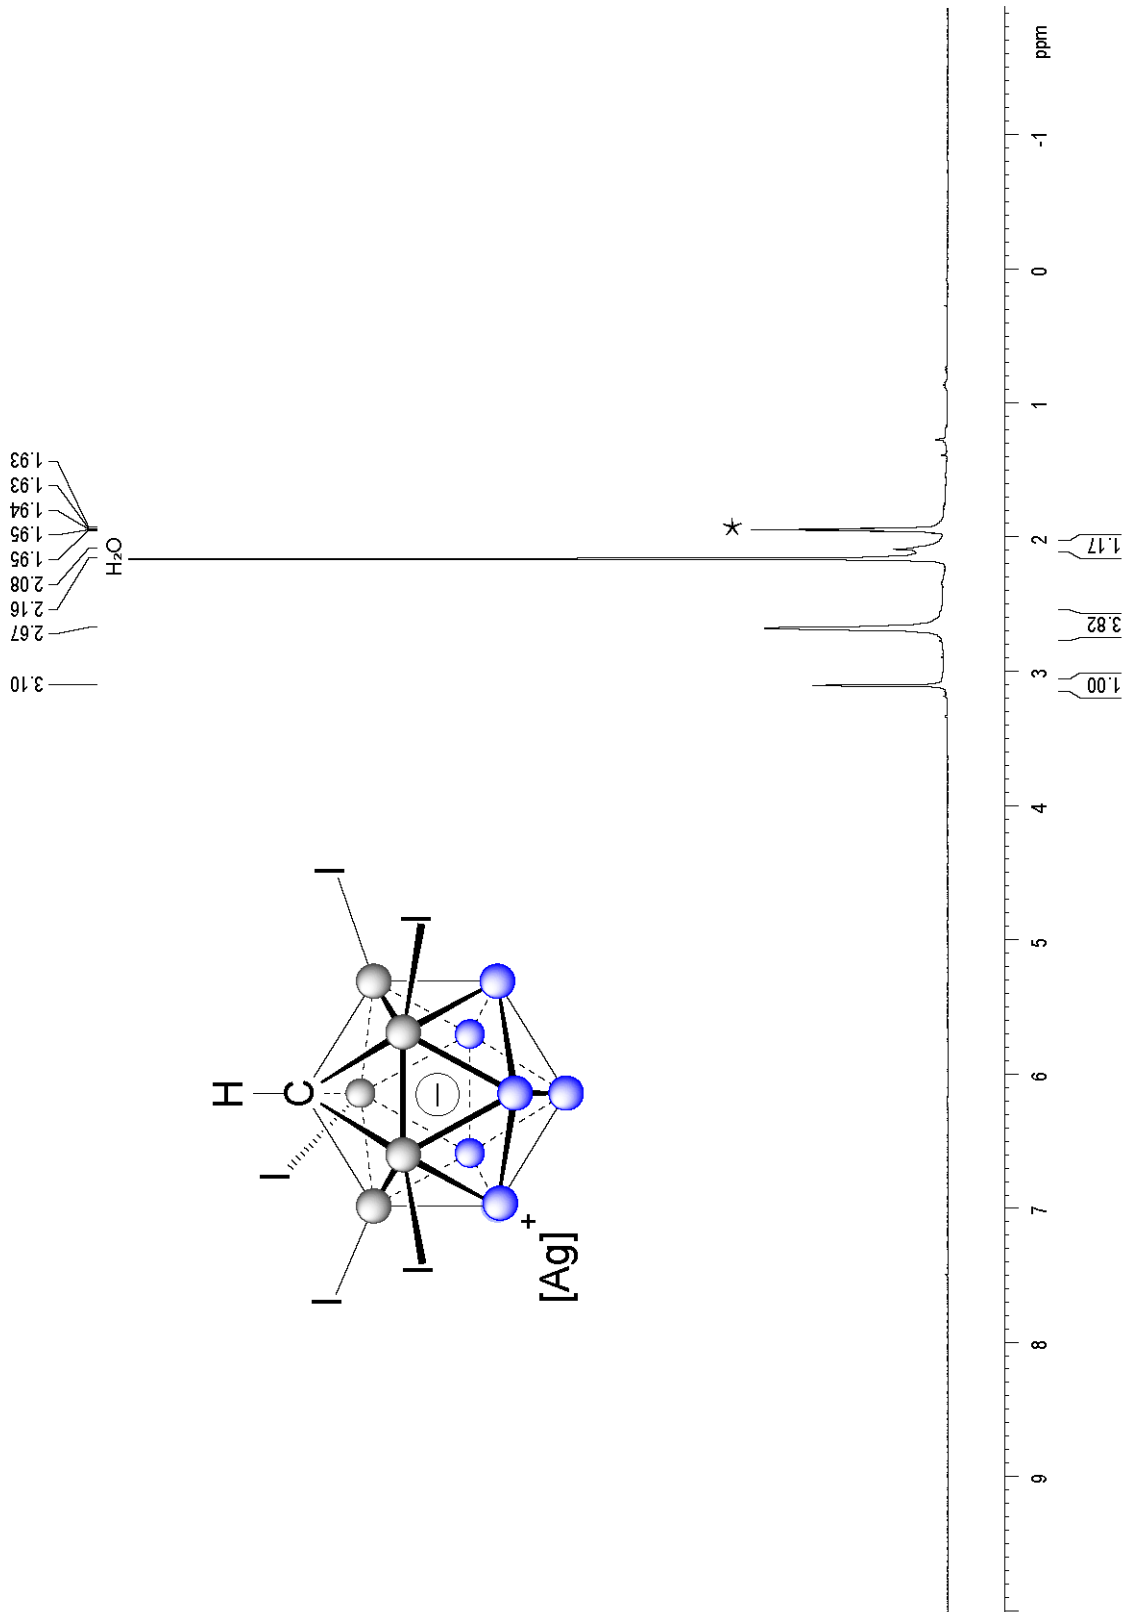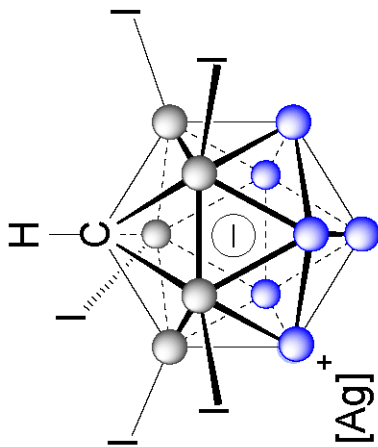



Current Data Parameters  
 NAME 400M-[Ag] [2,3,4,5,6-5-  
 EXPNO 4  
 PROCNO 1

F2 - Acquisition Parameters  
 Date\_ 20221030  
 Time 13.42  
 INSTRUM spect  
 PROBHD 5 mm FAPBO BB/  
 PULPROG zg  
 TD 65536  
 NS CD3CN  
 DS 128  
 US 4  
 SMH 25510.203 Hz  
 FIDRES 0.389255 Hz  
 AQC 1.2845056 sec  
 RG 193.34  
 DM 19.600 usec  
 DE 6.50 usec  
 TE 296.5 K  
 D1 1.0000000 sec  
 TDO 1

===== CHANNEL f1 =====  
 NUC1 11B  
 P1 9.93 usec  
 ELW1 52.9659960 W  
 SFO1 128.3776052 MHz

F2 - Processing parameters  
 SI 32768  
 SF 128.3776050 MHz  
 WDW EM  
 SSB 0  
 LB 1.00 Hz  
 GB 0  
 PC 1.40

[Ag][2,3,4,5,6-5I-CHB11H6]  
 128M, 11B NMR, 20mg, Acetonitrile-d3\*, 296K

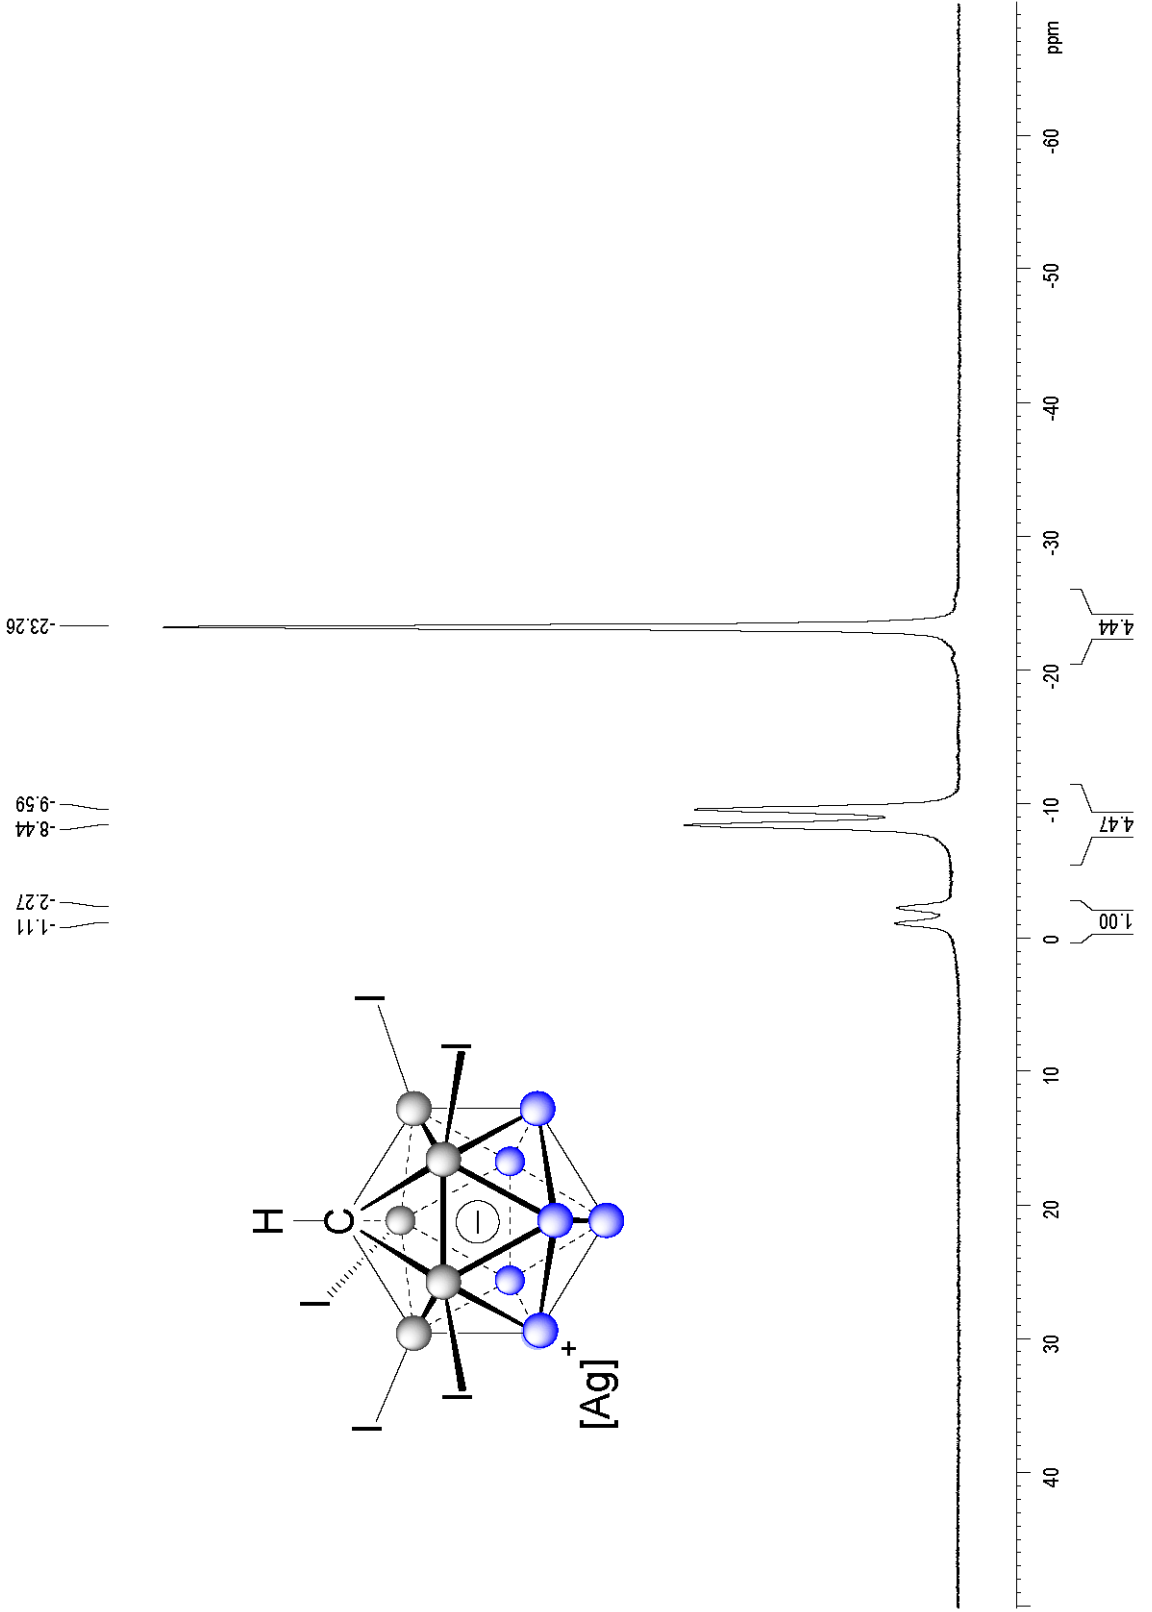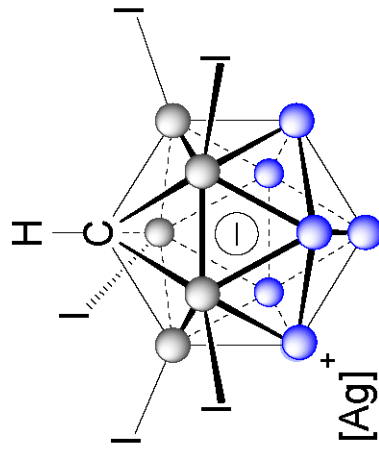

Current Data Parameters  
 NMRB 400M-[Ag][2,3,4,5,6-  
 EXPNO 3  
 PROCNO 1  
 F2 - Acquisition Parameters  
 Date\_ 20221030  
 Time 13.36  
 INSTRUM Spect  
 PROBHD 5 mm PABBO BB/  
 PULPROG zgpg30  
 TD 65536  
 SOLVENT CD3CN  
 NS 128  
 DS 4  
 SWH 25510.203 Hz  
 FIDRES 0.389255 Hz  
 AQ 1.2845056 sec  
 RG 183.34  
 DW 19.600 usec  
 DE 6.50 usec  
 TE 297.5 K  
 D1 1.00000000 sec  
 D11 0.03000000 sec  
 TDO 1

==== CHANNEL f1 =====  
 NUC1 11B  
 P1 9.93 usec  
 PLW1 52.9659960 W  
 SFO1 128.3776050 MHz  
 ===== CHANNEL f2 =====  
 CPDPRG2 waitz16  
 NUC2 1H  
 PCPD2 80.00 usec  
 PLW2 12.5000000 W  
 PLW12 0.43945000 W  
 PLW13 0.28125000 W  
 SFO2 400.1320007 MHz  
 F2 - Processing parameters  
 SI 32768  
 SF 128.3776050 MHz  
 MDM 0  
 SSB 0  
 LB 1.00 Hz  
 GB 0  
 PC 1.40

[Ag][2,3,4,5,6-5I-CHB11H6]  
 128M, 11B{1H} NMR, 20mg, Acetonitrile-d3\*, 296K

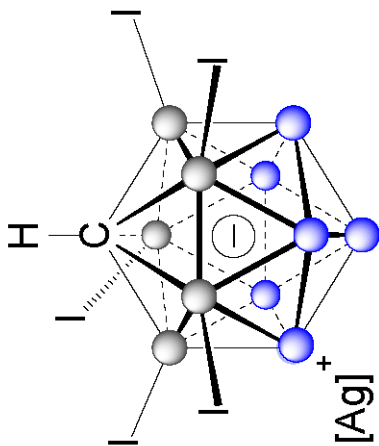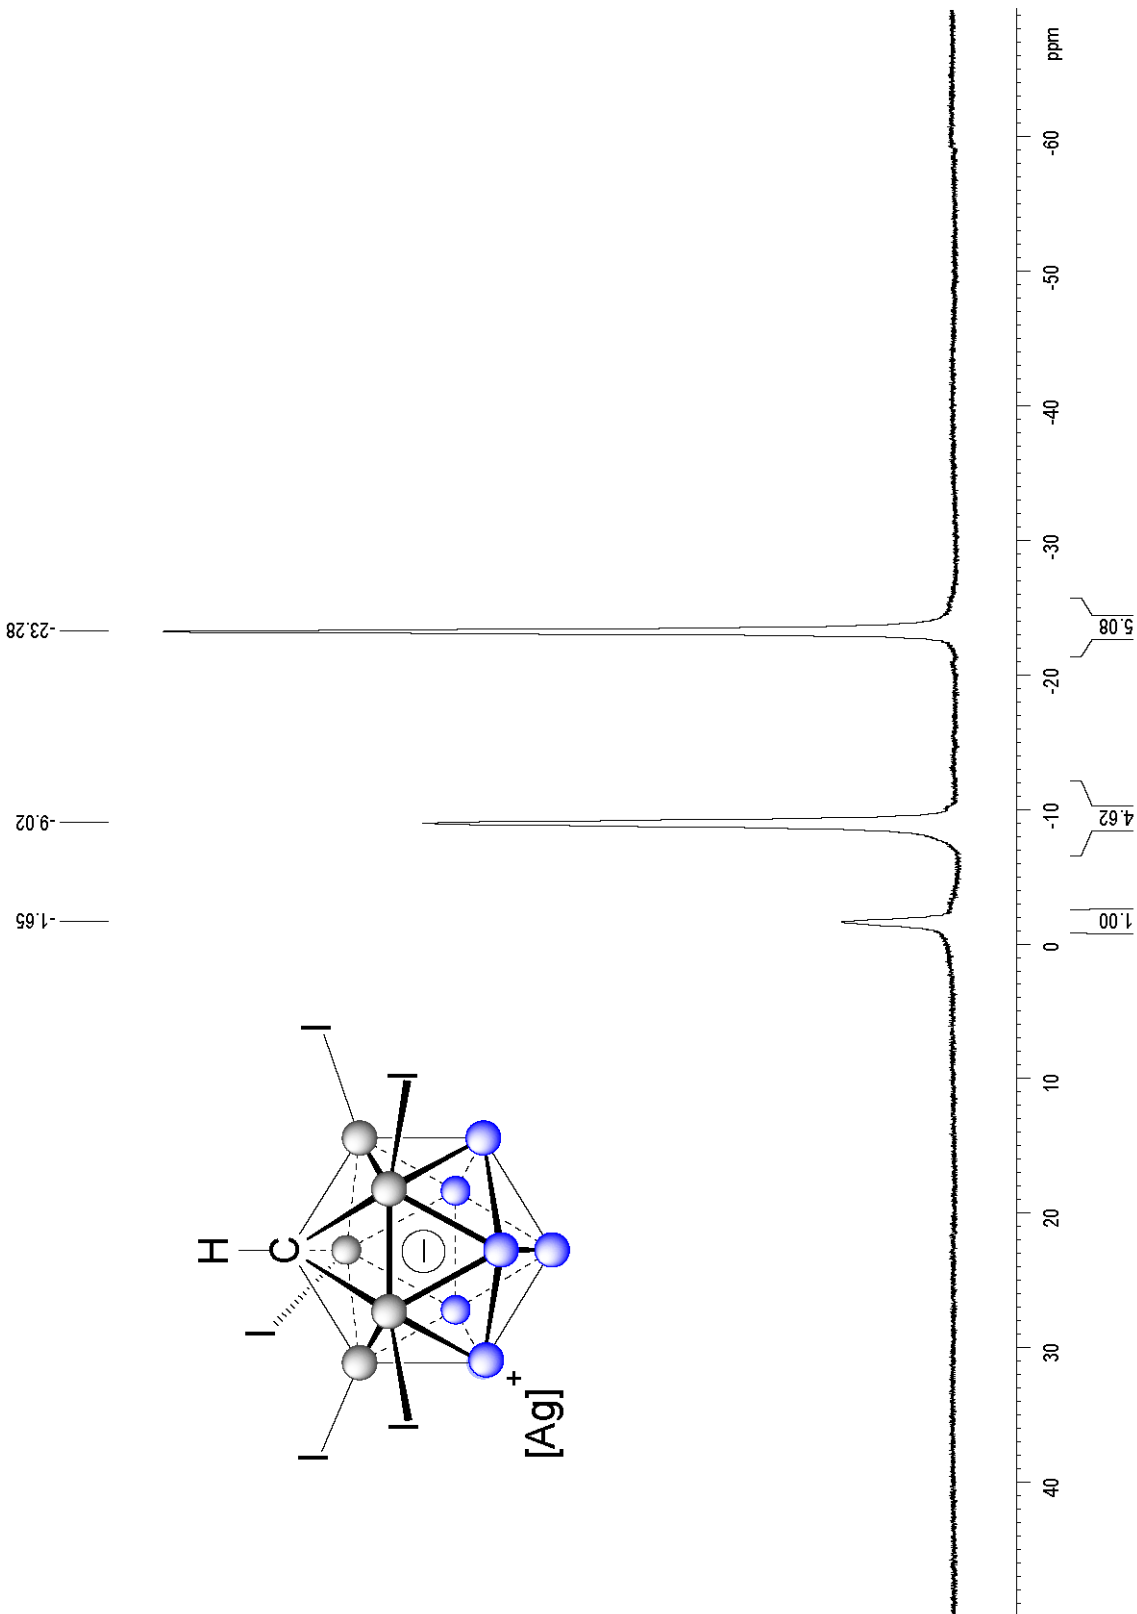

[Ag][2,3,4,5,6-5I-CHB11H6]  
 101M, 13C{1H} NMR, 16mg dissolved in 0.6 mL Acetonitrile-d3\*, 296K

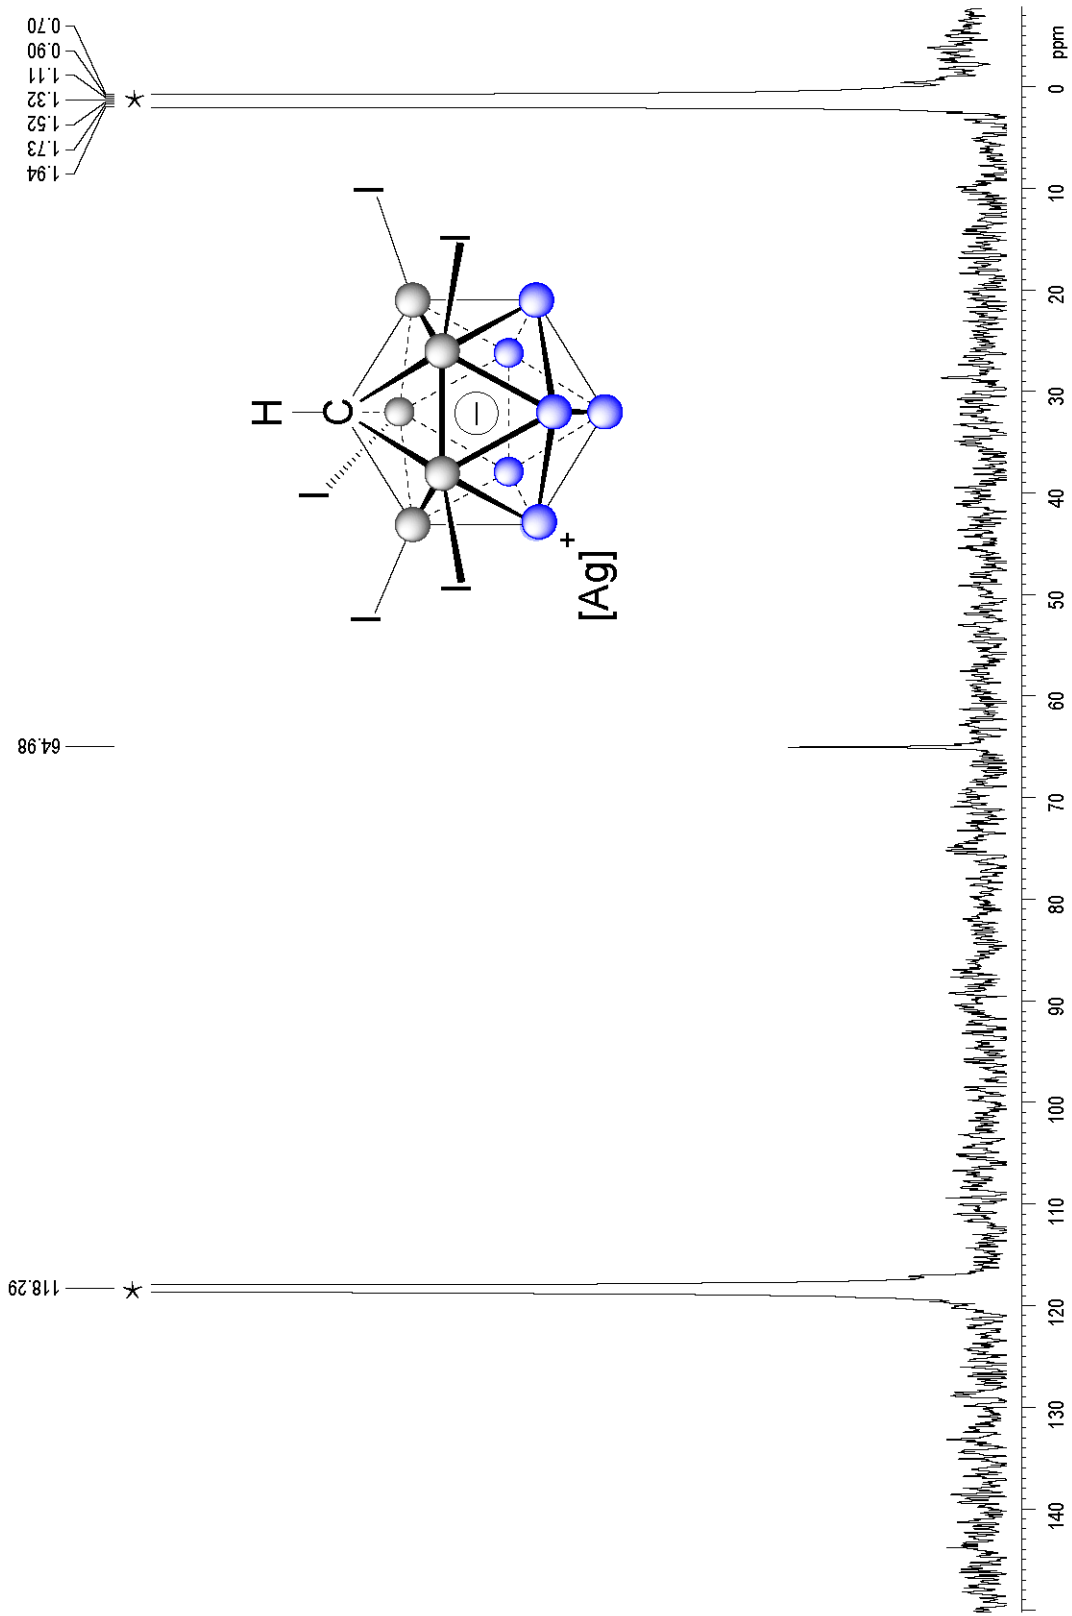

Current Data Parameters  
 NAME 0317-LCH-SI  
 EXPNO 2  
 PROCNO 1  
 F2 - Acquisition Parameters  
 Date\_ 20230318  
 Time 8.06 h  
 INSTRUM Avance  
 PROBHD z163739\_0656 (z8p30)  
 PULPROG zgpg30  
 TD 65536  
 SOLVENT CD3CN  
 NS 512  
 DS 4  
 SWH 25906.736 Hz  
 FIDRES 0.7790611 Hz  
 AQ 1.2648448 sec  
 RG 101  
 DM 19.300 usec  
 DE 6.50 usec  
 TE 295.9 K  
 D1 2.0000000 sec  
 D11 0.0300000 sec  
 TD0 1  
 SFO1 100.6248421 MHz  
 NUC1 13C  
 P0 2.67 usec  
 F1 8.00 usec  
 PLW1 94.05000305 W  
 SFO2 400.1316005 MHz  
 NUC2 1H  
 CDPDPRG2 waltz65  
 PCPD2 90.00 usec  
 PLW2 22.48500061 W  
 PLW12 0.17766000 W  
 PLW13 0.08936300 W  
 F2 - Processing parameters  
 SI 32768  
 SF 100.6126746 MHz  
 WDW EM  
 SSB 0  
 LB 10.00 Hz  
 GB 0  
 PC 1.40

Current Data Parameters  
 NAME 400M- [NMe3H] [2,3,4,5,  
 EXPNO 2  
 PROCNO 1

F2 - Acquisition Parameters  
 Date\_ 20221030  
 Time 15:00  
 INSTRUM Spect  
 PROBHD 5 mm PABBO BB/  
 PULPROG zgpg30  
 TD 16384  
 SOLVENT Acetone  
 NS 16  
 DS 4  
 SMH 8012.820 Hz  
 FIDRES 0.489064 Hz  
 AQ 1.0223616 sec  
 RG 193.34  
 DW 62.400 usec  
 DE 6.50 usec  
 TE 296.1 K  
 D1 1.00000000 sec  
 D11 0.03000000 sec  
 TDO 1

===== CHANNEL f1 =====  
 NUC1 1H  
 P1 15.00 usec  
 PLW1 12.5000000 W  
 SFO1 400.1320007 MHz

===== CHANNEL f2 =====  
 CPDPRG2 garp4  
 NUC2 11B  
 PCPD2 90.00 usec  
 PLW2 52.9659960 W  
 PLW12 0.6447998 W  
 SFO2 128.3776050 MHz

F2 - Processing parameters  
 SI 32768  
 SF 400.1300072 MHz  
 MDW 0  
 SSB 0  
 LB 1.00 Hz  
 GB 0  
 PC 1.40

[NMe3H][2,3,4,5,6-5I-CHB11H6]  
 400M, 1H{1B} NMR, 20mg, Acetone-d6, 296K

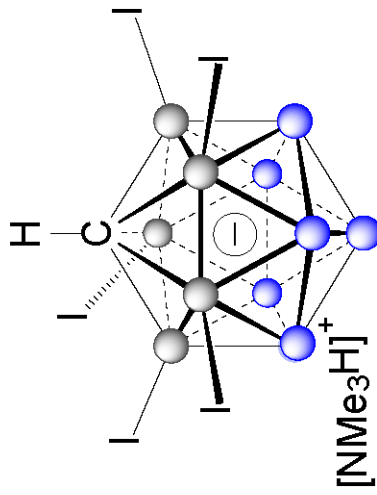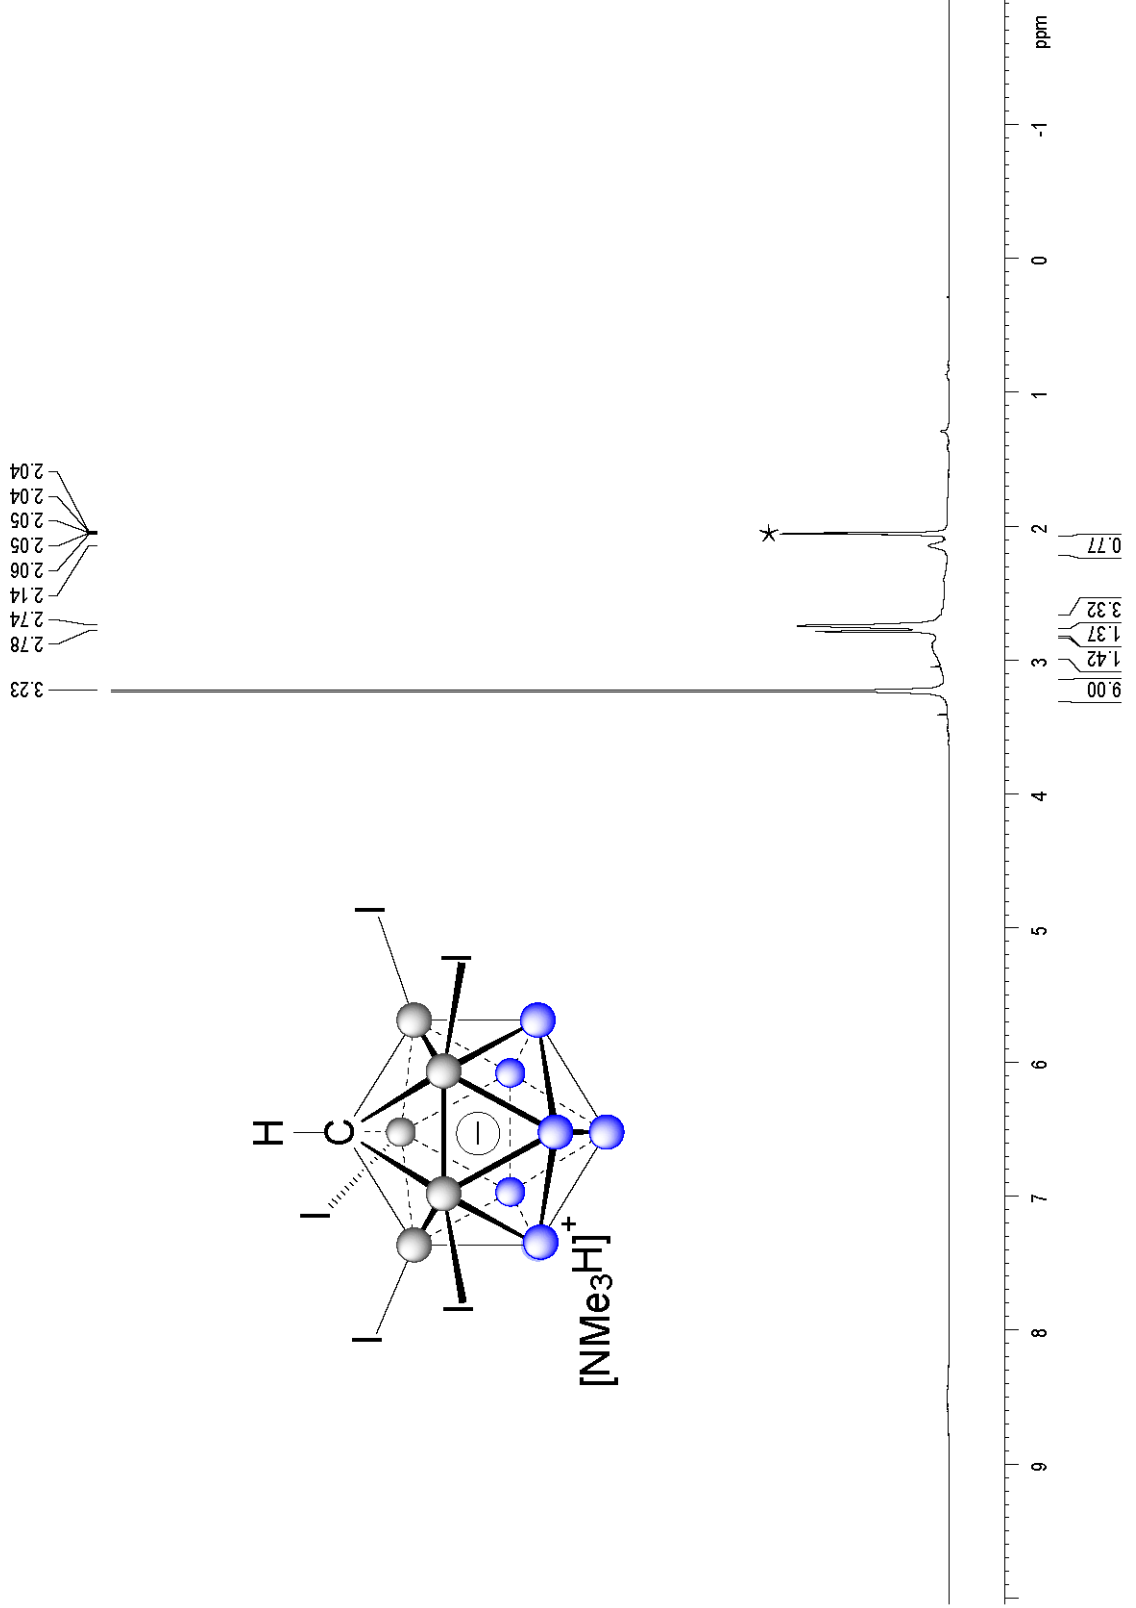

Current Data Parameters  
 NAME 400M-[NMe3H][2,3,4,5,6-  
 EXPNO 4  
 PROCNO 1

F2 - Acquisition Parameters  
 Date\_ 20221030  
 Time 13.13  
 INSTRUM spect  
 PROBHD 5 mm PABBO BB/  
 PULPROG zg  
 TD 65536  
 SOLVENT Acetone  
 NS 128  
 DS 4  
 SWH 25510.203 Hz  
 FIDRES 0.389255 Hz  
 AQ 1.2845056 sec  
 RG 193.34  
 DW 19.600 usec  
 DE 6.50 usec  
 TE 296.0 K  
 D1 1.0000000 sec  
 TDO 1

==== CHANNEL f1 =====  
 NUC1 11B  
 P1 9.93 usec  
 PLW1 52.9659960 W  
 SFO1 128.3776052 MHz

F2 - Processing parameters  
 SI 32768  
 SF 128.3776050 MHz  
 WDW EM  
 SSB 0  
 LB 1.00 Hz  
 GB 0  
 PC 1.40

[NMe3H][2,3,4,5,6-5I-CHB11H6]  
 128M, 11B NMR, 20mg, Acetone-d6, 296K

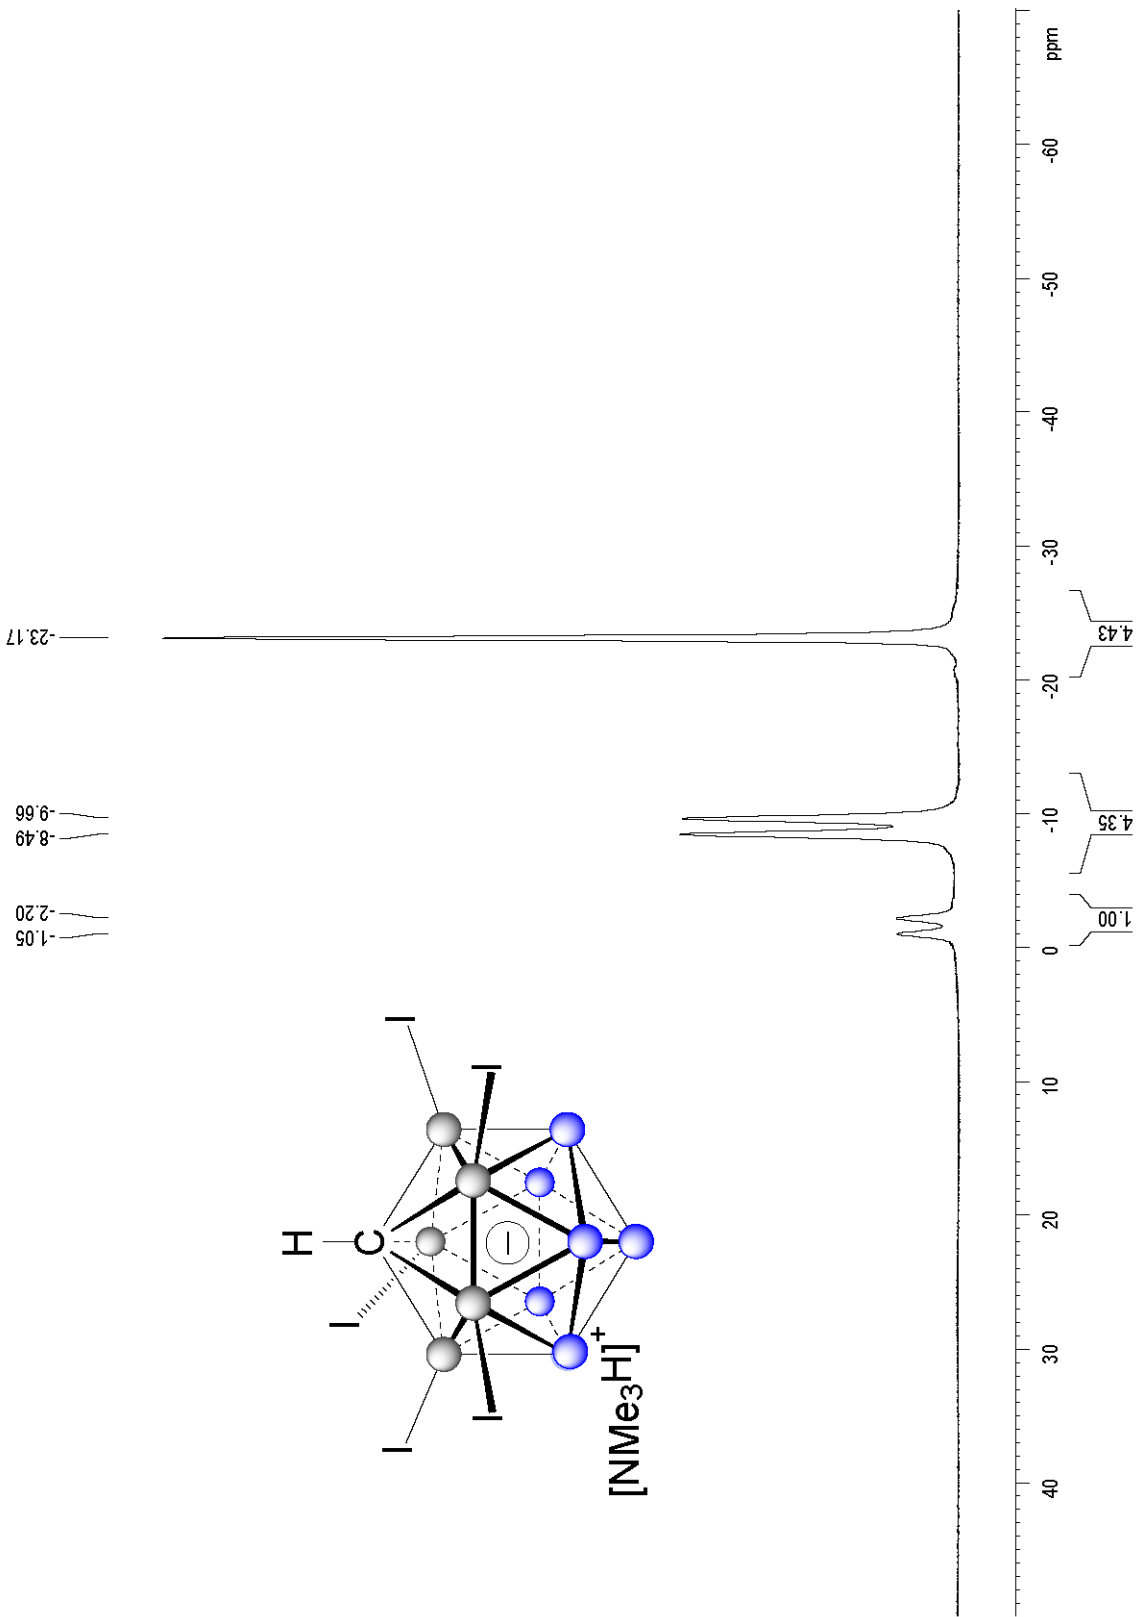

Current Data Parameters  
 NAME 400M- [NMe3H]<sup>+</sup>[2,3,4,5,6-  
 EXPNO 3  
 PROCNO 1

[NMe3H]<sup>+</sup>[2,3,4,5,6-5I-CHB(1H6)]  
 128M, 11B{1H} NMR, 20mg, Acetone-d6\*, 296K

F2 - Acquisition Parameters  
 Date\_ 20221030  
 Time 15:07  
 INSTRUM spect  
 PROBHD 5 mm PABBO BB/  
 PULPROG zgpg30  
 TD 65536  
 SOLVENT Acetone  
 NS 128  
 DS 4  
 SWH 25510.203 Hz  
 FIDRES 0.389235 Hz  
 AQC 1.2845056 sec  
 RG 193.34  
 DM 19.600 usec  
 DE 6.50 usec  
 TE 296.8 K  
 D1 1.00000000 sec  
 D11 0.03000000 sec  
 TDO 1

===== CHANNEL f1 =====  
 NUC1 11B  
 P1 9.93 usec  
 PLW1 52.9659960 W  
 SFO1 128.3776050 MHz

===== CHANNEL f2 =====  
 CPDPRG2 waltz16  
 NUC2 1H  
 PCPD2 80.00 usec  
 PLW2 12.50000000 W  
 PLW12 0.43945000 W  
 PLW13 0.28125000 W  
 SFO2 400.1320007 MHz

F2 - Processing parameters  
 SI 32768  
 SF 128.3776050 MHz  
 WDW EM  
 SSB 0  
 LB 1.00 Hz  
 GB 0  
 PC 1.40

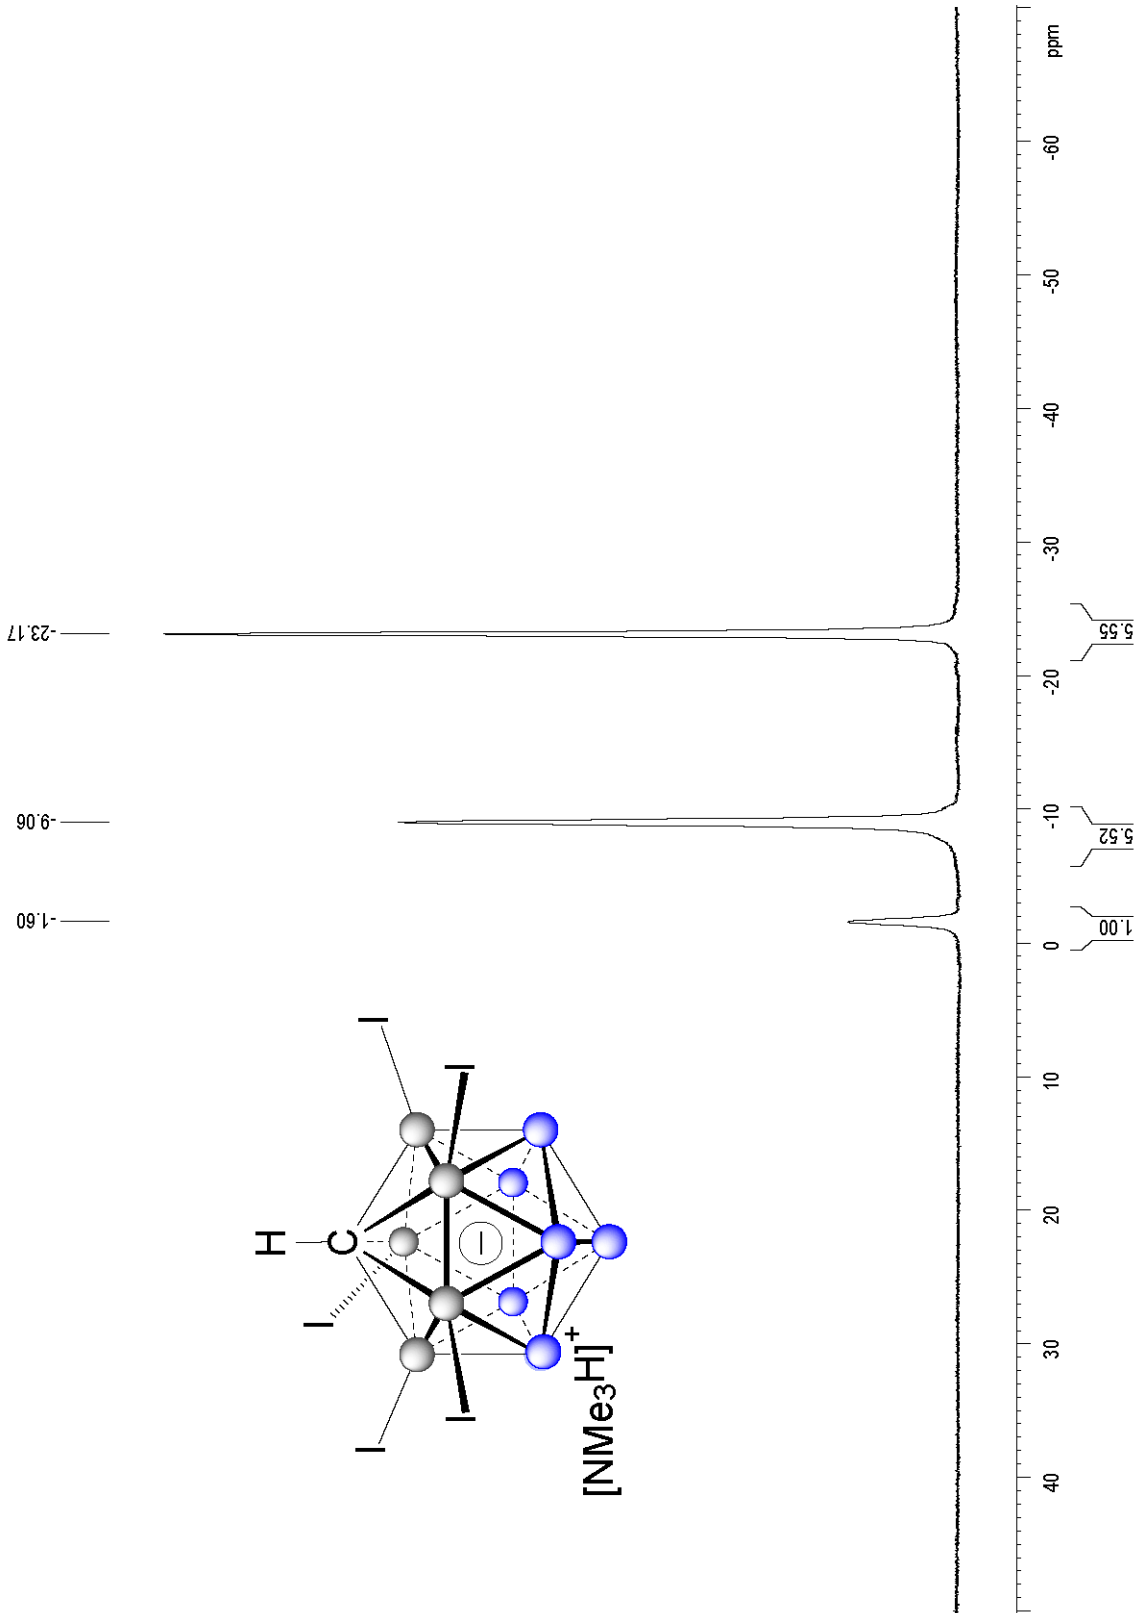

Current Data Parameters  
 NAME 400M-[NMe3H][2,3,4,5,6  
 EXNO 5  
 PROCNO 1

F2 - Acquisition Parameters  
 Date\_ 20221030  
 Time\_ 15:37  
 INSTRUM Specc  
 PROBDH 5 mm PABBO.BB/  
 PULPROG zgpg30  
 TD 65336  
 SOLVENT Acetone  
 NS 512  
 DS 4  
 SWH 29761.904 Hz  
 FIDRES 0.454131 Hz  
 AQ 1.1010048 sec  
 RG 193.34  
 DM 16.800 usec  
 DE 6.50 usec  
 TE 296.6 K  
 D1 1.50000000 sec  
 D11 0.03000000 sec  
 TDO 1

==== CHANNEL f1 =====  
 NUC1 13C  
 P1 10.00 usec  
 PLW1 53.00000000 W  
 SF01 100.6228293 MHz

==== CHANNEL f2 =====  
 CPDPRG2 waltz16  
 NUC2 1H  
 P2 80.00 usec  
 PLW2 12.50000000 W  
 PLW12 0.43945000 W  
 PLW13 0.28125000 W  
 SF02 400.1316005 MHz

F2 - Processing parameters  
 SI 32768  
 SF 100.6126784 MHz  
 WDW EM  
 SSB 0  
 LB 1.00 Hz  
 GB 0  
 PC 1.40

[NMe3H][2,3,4,5,6-5I-CHB11H6]  
 101M, 11C{1H} NMR, 20mg, Acetone-d6\*, 296K

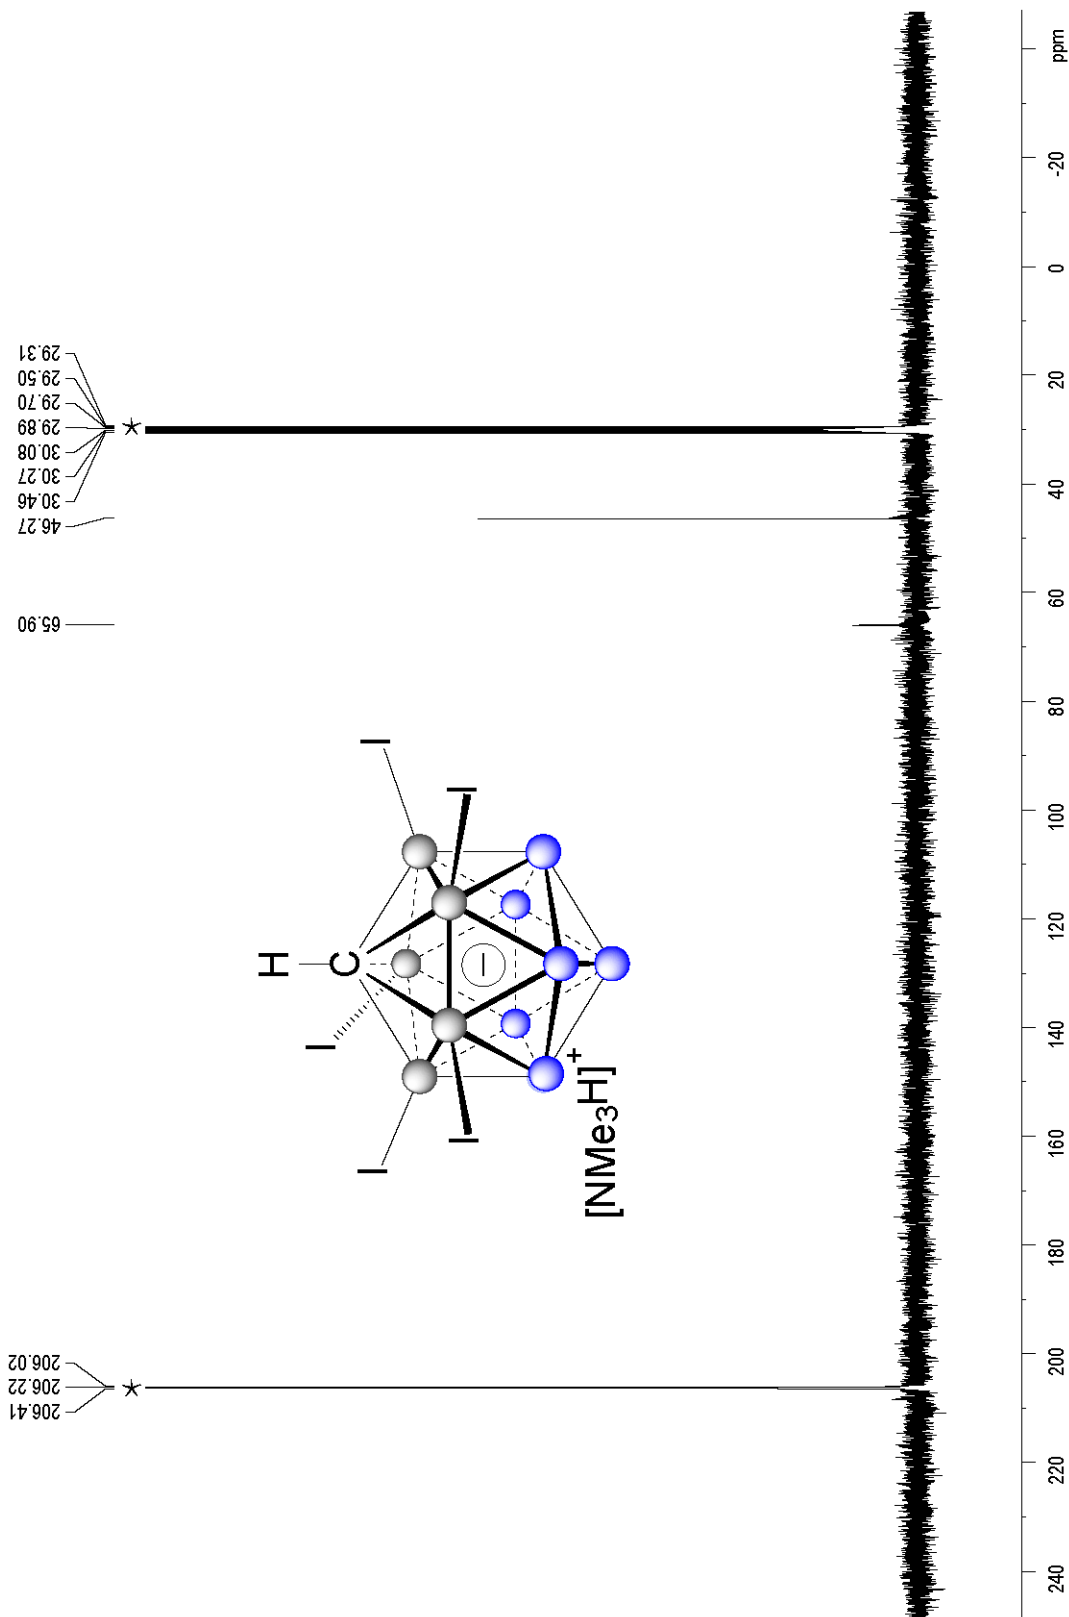

Current Data Parameters  
 NAME 1H{11B} NMR,500M,Acetonitrile  
 EXNO 4  
 PROCNO 1

[NEt4][2,3,4,5,6-5I-12-Me-CB11H6]  
 500MHz, 1H{11B} NMR, 20mg, 0.5 mL acetonitrile-d3\*, 296K

F2 - Acquisition Parameters  
 Date\_ 20220618  
 Time\_ 0.17  
 INSTRUM spect  
 PROBHD 5 mm PABBO-BB-  
 PULPROG zgpg30  
 TD 65536  
 SOLVENT CD3CN  
 NS 16  
 DS 0  
 SWH 12500.000 Hz  
 FIDRES 0.190735 Hz  
 AQ 2.6214399 sec  
 RG 203  
 DW 40.000 usec  
 DE 6.50 usec  
 TE 296.9 K  
 D1 5.00000000 sec  
 D11 0.03000000 sec

==== CHANNEL f1 =====  
 NUC1 1H  
 P1 11.70 usec  
 PLW1 19.00000000 W  
 SF01 500.1335009 MHz

==== CHANNEL f2 =====  
 CPDPRG[2] gatp  
 NUC2 11B  
 P2 100.00 usec  
 PLW2 95.00000000 W  
 PLW12 1.63030005 W  
 SF02 160.4615690 MHz

F2 - Processing parameters  
 SI 65536  
 SF 500.1300153 MHz  
 WDW EM  
 SSB 0  
 LB 1.00 Hz  
 GB 0  
 PC 1.00

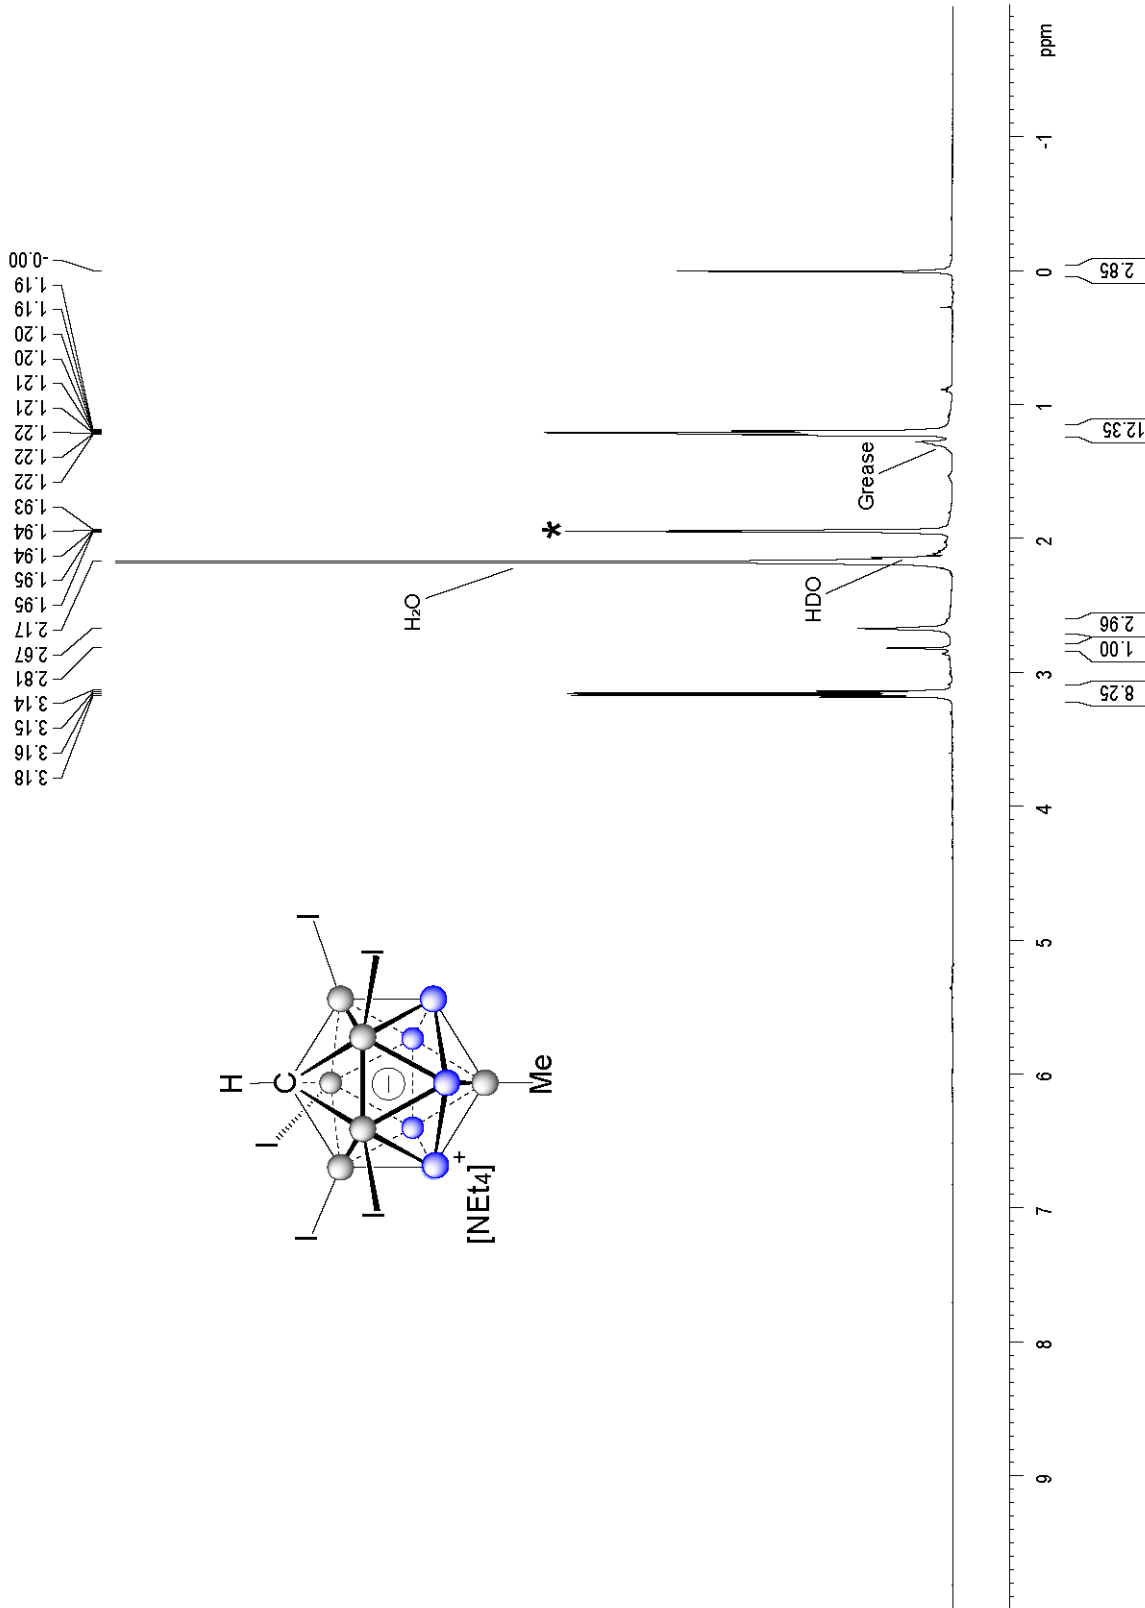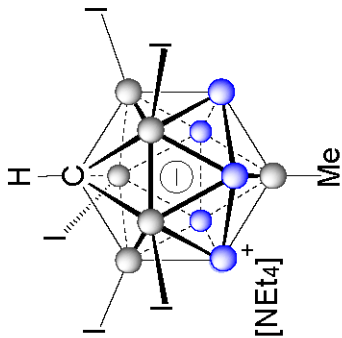



```

Current Data Parameters
NAME      11B NMR, 400M, Acetone
EXPNO     2
PROCNO    1
F2 - Acquisition Parameters
Date_     20221008
Time      8.26
INSTRUM   spect
PROBHD    5 mm PABBO BB/
PULPROG   zg
TD         65536
SOLVENT   Acetone
NS         128
DS         4
SWH        25510.203 Hz
FIDRES     0.389235 Hz
AQ         1.2845056 sec
RG         193.34
DM         19.600 usec
DE         6.50 usec
TE         296.0 K
D1         1.00000000 sec
TDO       1
===== CHANNEL f1 =====
NUC1       11B
P1         9.93 usec
PL1        52.96599960 W
SFO1       128.3776052 MHz
F2 - Processing parameters
SI         32768
SF         128.3776050 MHz
WDW        EM
SSB        0
LB         10.00 Hz
GB         0
PC         1.40

```

[NEt4][2,3,4,5,6-5l-12-Me-CB11H6]  
 128MHz, 11B NMR, 6mg, 0.5 mL acetone-d6, 296K

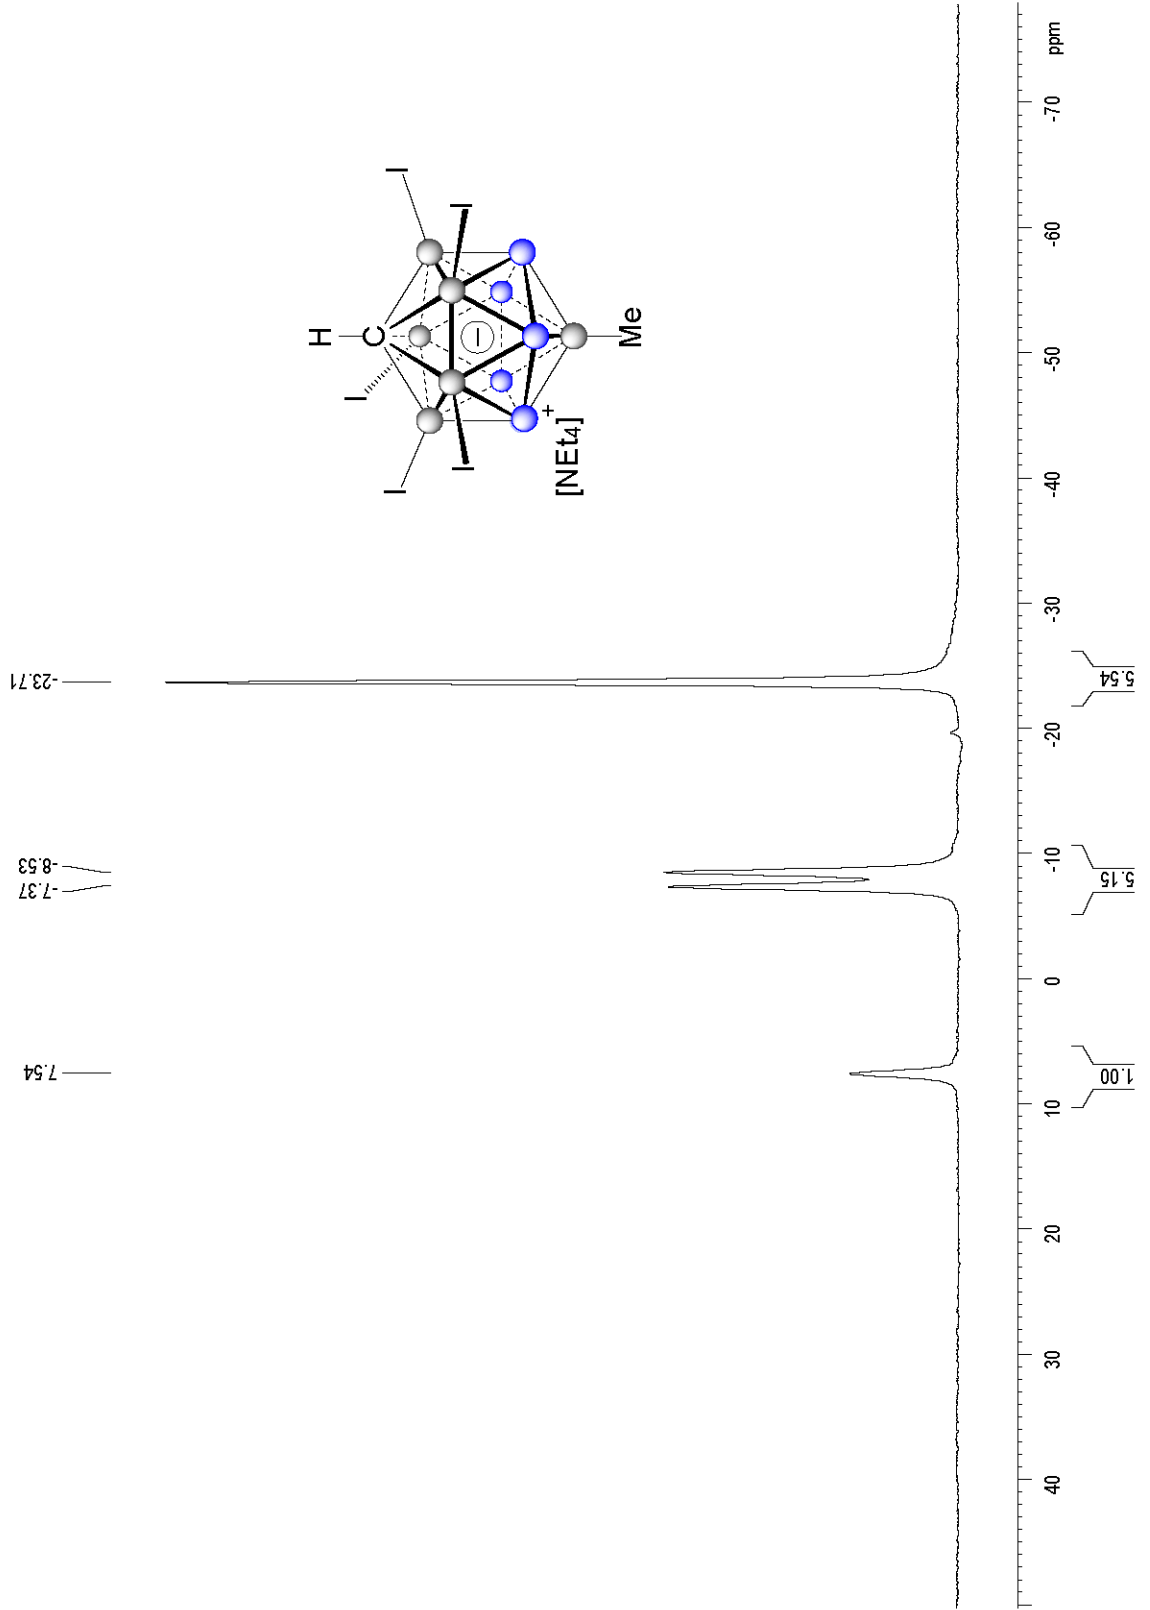

Current Data Parameters  
 NAME 11B{1H} NMR, 400M, Aceton  
 EXNO 1  
 PROCNO 1

[NEt4][2,3,4,5,6-5l-12-Me-CB11H6]  
 128MHz, 11B{1H} NMR, 6mg, 0.5 mL acetone-d6\*, 296K

F2 - Acquisition Parameters  
 Date\_ 20221008  
 Time\_ 8.21  
 INSTRUM spect  
 PROBHD 5 mm FAPBO BB/  
 PULPROG zgpg30  
 TD 65536  
 SOLVENT Acetone  
 NS 128  
 DS 4  
 SWH 25510.203 Hz  
 FIDRES 0.389235 Hz  
 AQ 1.2845056 sec  
 RG 193.34  
 DM 19.600 usec  
 DE 6.50 usec  
 TE 296.9 K  
 D1 1.00000000 sec  
 D11 0.03000000 sec  
 TDO 1

===== CHANNEL f1 =====  
 NUC1 11B  
 P1 9.93 usec  
 PLW1 52.96599960 W  
 SF01 128.3776050 MHz

===== CHANNEL f2 =====  
 CPDPRG2 waltz16  
 NUC2 1H  
 PCPD2 80.00 usec  
 PLW2 12.50000000 W  
 PLW12 0.43945000 W  
 PLW13 0.28125000 W  
 SF02 400.1320007 MHz

F2 - Processing parameters  
 SI 32768  
 SF 128.3776050 MHz  
 WDW EM  
 SSB 0  
 LB 10.00 Hz  
 GB 0  
 PC 1.40

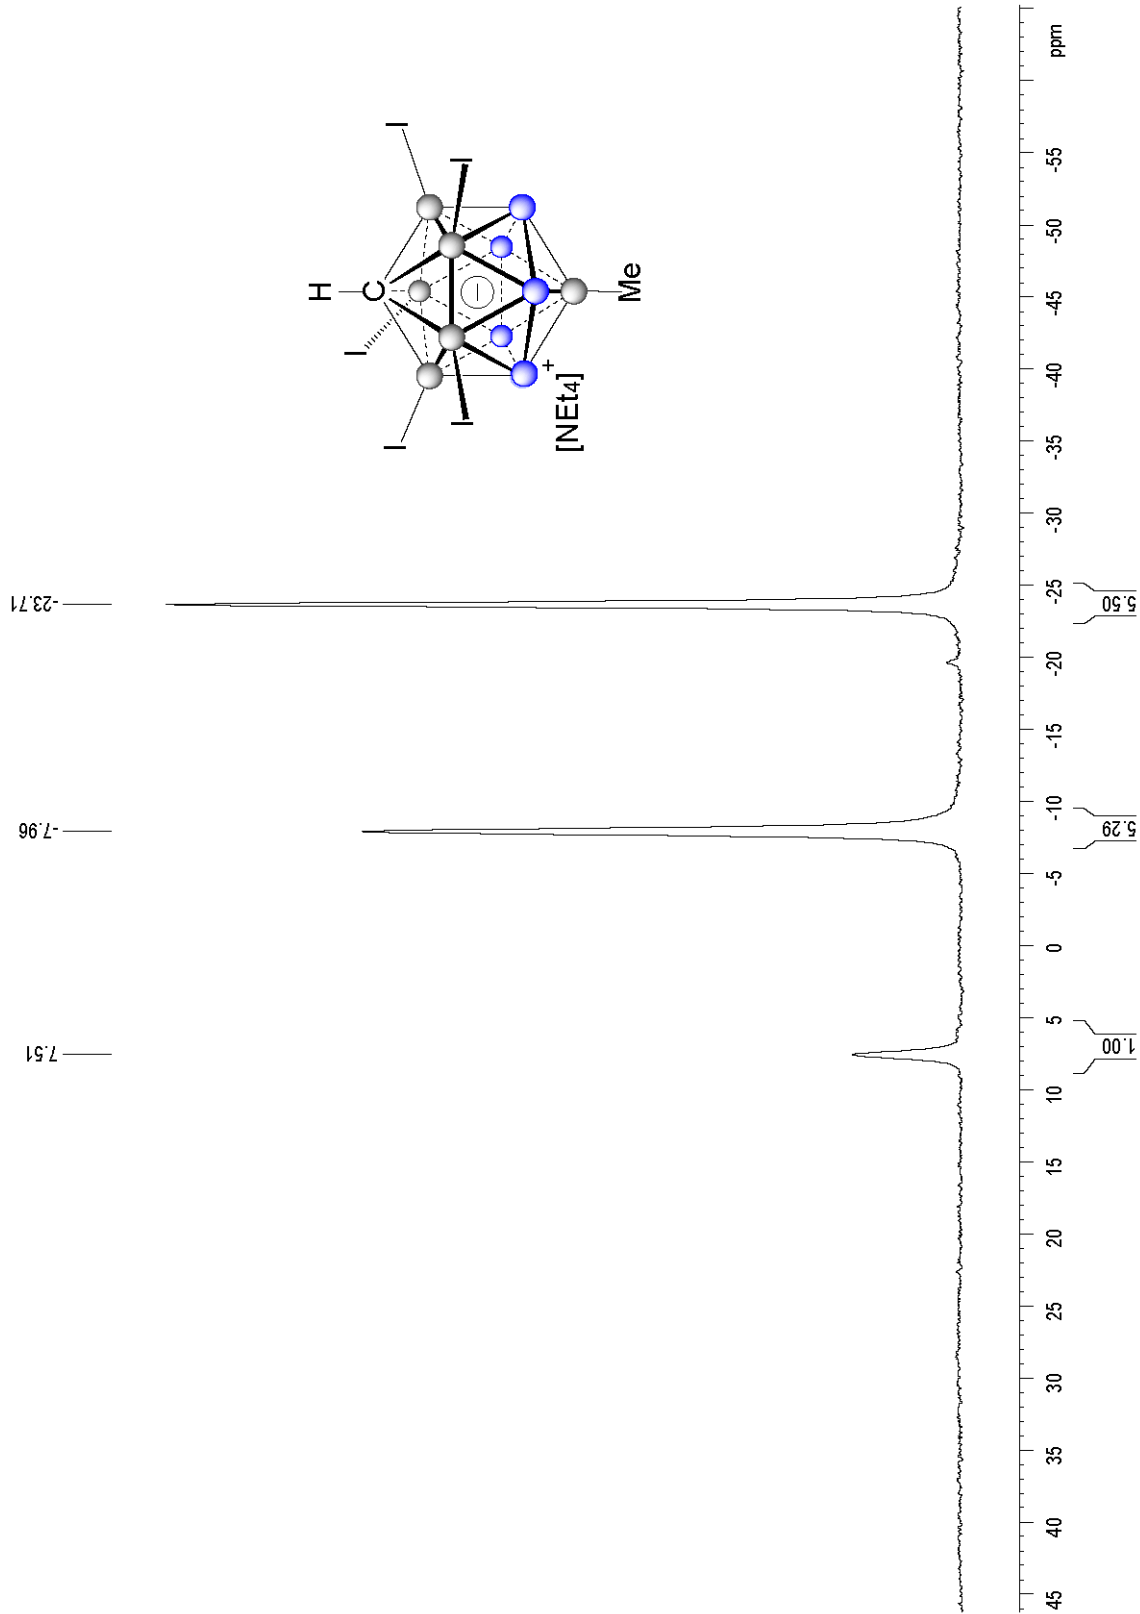

[NEt<sub>4</sub>][2,3,4,5,6-5i-12-Me-CB11H<sub>6</sub>]  
 101MHz, <sup>13</sup>C{<sup>1</sup>H} NMR, 10mg, 0.5 mL acetone-d<sub>6</sub>\*, 296K

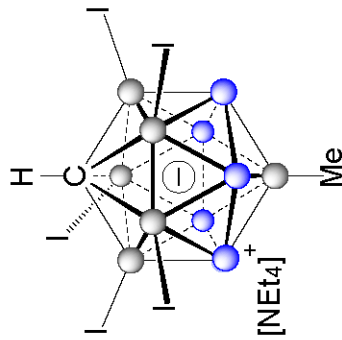

```

Current Data Parameters
NAME      13C(1H) NMR400M,Acetone
EXPNO     1
PROCNO    1
F2 - Acquisition Parameters
Date_     20221010
Time      18.58
INSTRUM   spect
PROBHD    5 mm PABBO BB/
PULPROG   zgpg30
TD         65536
SOLVENT   Acetone
NS         1024
DS         4
SWH        29761.904 Hz
FIDRES     0.454131 Hz
AQ         1.1010048 sec
RG         193.34
DW         16.800 usec
DE         6.50 usec
TE         297.6 K
D1         1.50000000 sec
D11        0.03000000 sec
TD0        1
===== CHANNEL f1 =====
NUC1       13C
P1         10.00 usec
PLW1       53.00000000 W
SFO1       100.6228293 MHz
===== CHANNEL f2 =====
CPDPRG12  waltz16
NUC2       1H
PCPD2      80.00 usec
PLW2       12.50000000 W
PLW12     0.43945000 W
PLW13     0.28125000 W
SFO2       400.1316005 MHz
F2 - Processing parameters
SI         32768
SF         100.6126835 MHz
WDW        EM
SSB        0
LB         10.00 Hz
GB         0
PC         1.40
  
```

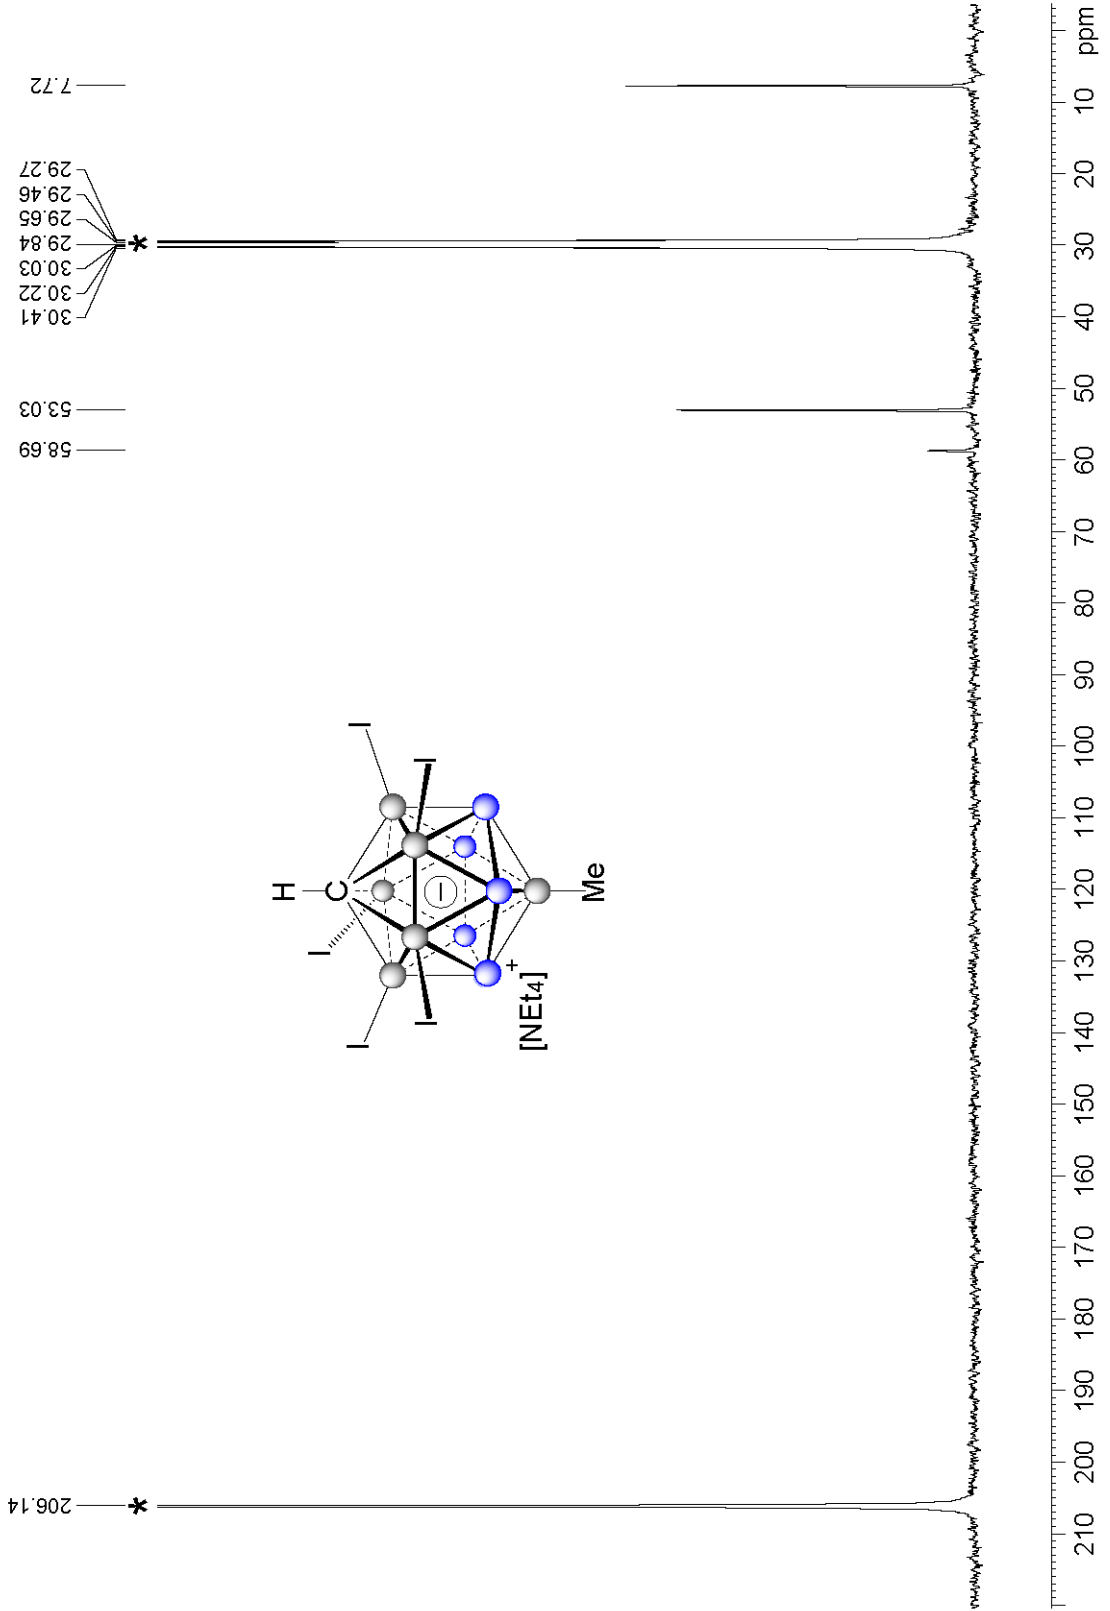

[NEt4][2,3,4,5,6-5I-12-Me-CHB11H5]  
 400MHz, 101MHz, HSQC NMR, 20mg, 0.6mL acetone-d6, 296K

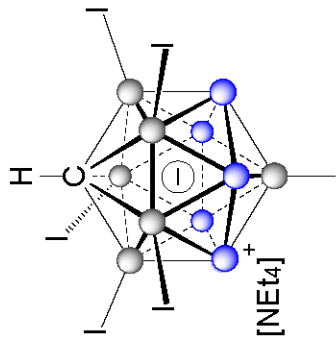

```

Current Data Parameters
NAME Me
EXPNO 3
PROCNO 1

F2 - Acquisition Parameters
Date_ 20211015
Time 17.40
INSTRUM spect
PROBHD 5 mm PABBS-1B7
PULPROG hsqcstps12
TD 1024
SOLVENT Acetone
NS 2
DS 16
SWH 6009.613 Hz
FIDRES 0.0851988 Hz
RG 183.34
AQ 0.0001990 sec
DE 83.200 usec
TE 295.7 K
CNS1 145.0000000
CNS2 0.0000000
D0 0.0000000 sec
D1 1.0017244 sec
D11 0.0300000 sec
D16 0.0002000 sec
D24 0.0008207 sec
IN0 0.00001990 sec
ZGPTNS

===== CHANNEL f1 =====
NUC1 1H
P1 15.00 usec
P2 30.00 usec
PLW1 12.5000000 W
SFO1 400.1328009 MHz

===== CHANNEL f2 =====
CPDPRG2 gq3c
NUC2 13C
P3 10.00 usec
P4 20.00 usec
PCPD2 70.00 usec
PLW2 53.0000000 W
SFO2 100.6238364 MHz

===== GRADIENT CHANNEL =====
GENM[1] SMSQ10.100
GENM[2] SMSQ10.100
GENM[3] SMSQ10.100
GENM[4] SMSQ10.100
GEZ1 80.00 %
GEZ2 20.10 %
GEZ3 16.00 %
P124 5.00 usec
P19 1000.00 usec
P19 600.00 usec

F1 - Acquisition parameters
TD 256
SFO1 100.6238 MHz
FIDRES 196.524048 Hz
AQ 0.0001990 sec
RG 183.34
SFO2 400.1328009 MHz
P19 600.00 usec

F2 - Processing parameters
SI 1024
SF 400.1300085 MHz
WDW 8SING
GB 2
PC 1.40

F1 - Processing parameters
SI 1024
MC2 echo-antico
SF 100.6126655 MHz
WDW 8SING
GB 0
  
```

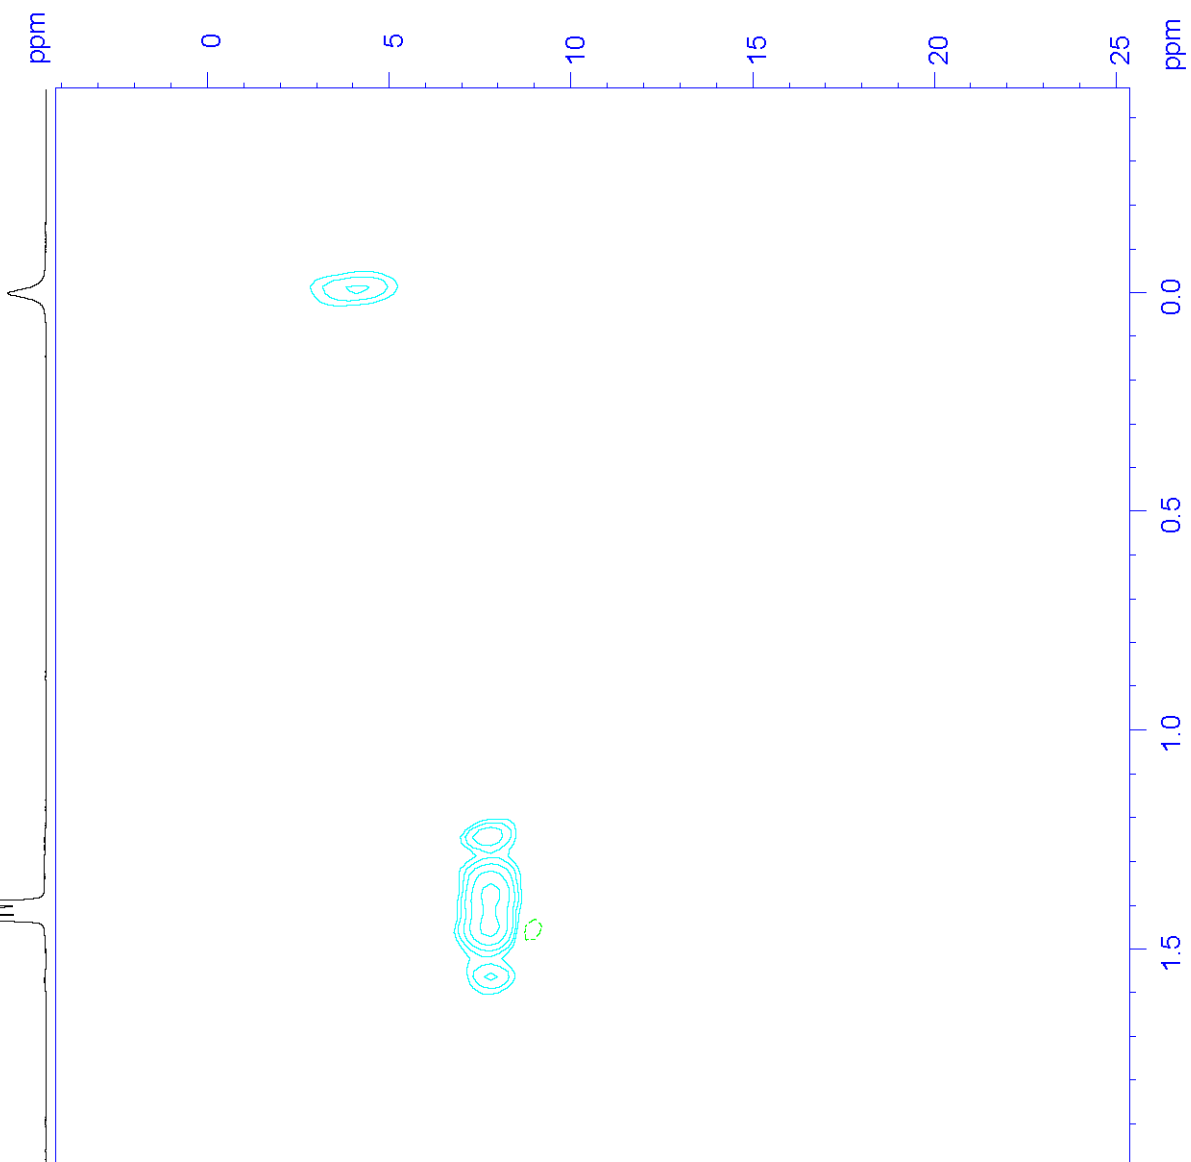

Current Data Parameters  
 NAME 1H(11B) NMR, 500M, Aceto  
 EXENO 4  
 PROCNO 1  
 F2 - Acquisition Parameters  
 Date\_ 20220618  
 Time\_ 0.31  
 INSTRUM spect  
 PROBHD 5 mm PABEO BB-  
 PULPROG zgpg30  
 TD 65536  
 SOLVENT CD3CN  
 NS 16  
 DS 0  
 SMH 12500.000 Hz  
 FIDRES 0.190735 Hz  
 AQ 2.6214399 sec  
 RG 11.4  
 DM 40.000 usec  
 DE 6.50 usec  
 TE 297.1 K  
 D1 5.00000000 sec  
 D11 0.03000000 sec  
 ===== CHANNEL f1 =====  
 NUC1 1H  
 P1 11.70 usec  
 PLW1 19.00000000 W  
 SFO1 500.1335009 MHz  
 ===== CHANNEL f2 =====  
 CPDPRG2 gatp  
 NUC2 11B  
 P2 100.00 usec  
 PLW2 95.00000000 W  
 PLW12 1.63030005 W  
 SFO2 160.4615690 MHz  
 F2 - Processing parameters  
 SI 65536  
 SF 500.1300154 MHz  
 WDW EM  
 SSB 0  
 LB 1.00 Hz  
 GB 0  
 PC 1.00

[NEt4][2,3,4,5,6-5I-12-Et-CB11H6]  
 500MHz, 1H{11B} NMR, 20mg, 0.5 mL acetonitrile-d3\*, 296K

3.18  
3.17  
3.15  
3.14  
2.86  
2.65  
1.95  
1.95  
1.94  
1.94  
1.93  
1.23  
1.22  
1.22  
1.21  
1.21  
1.20  
1.20  
1.19  
1.19  
0.76  
0.75  
0.73  
0.51  
0.50  
0.48  
0.46

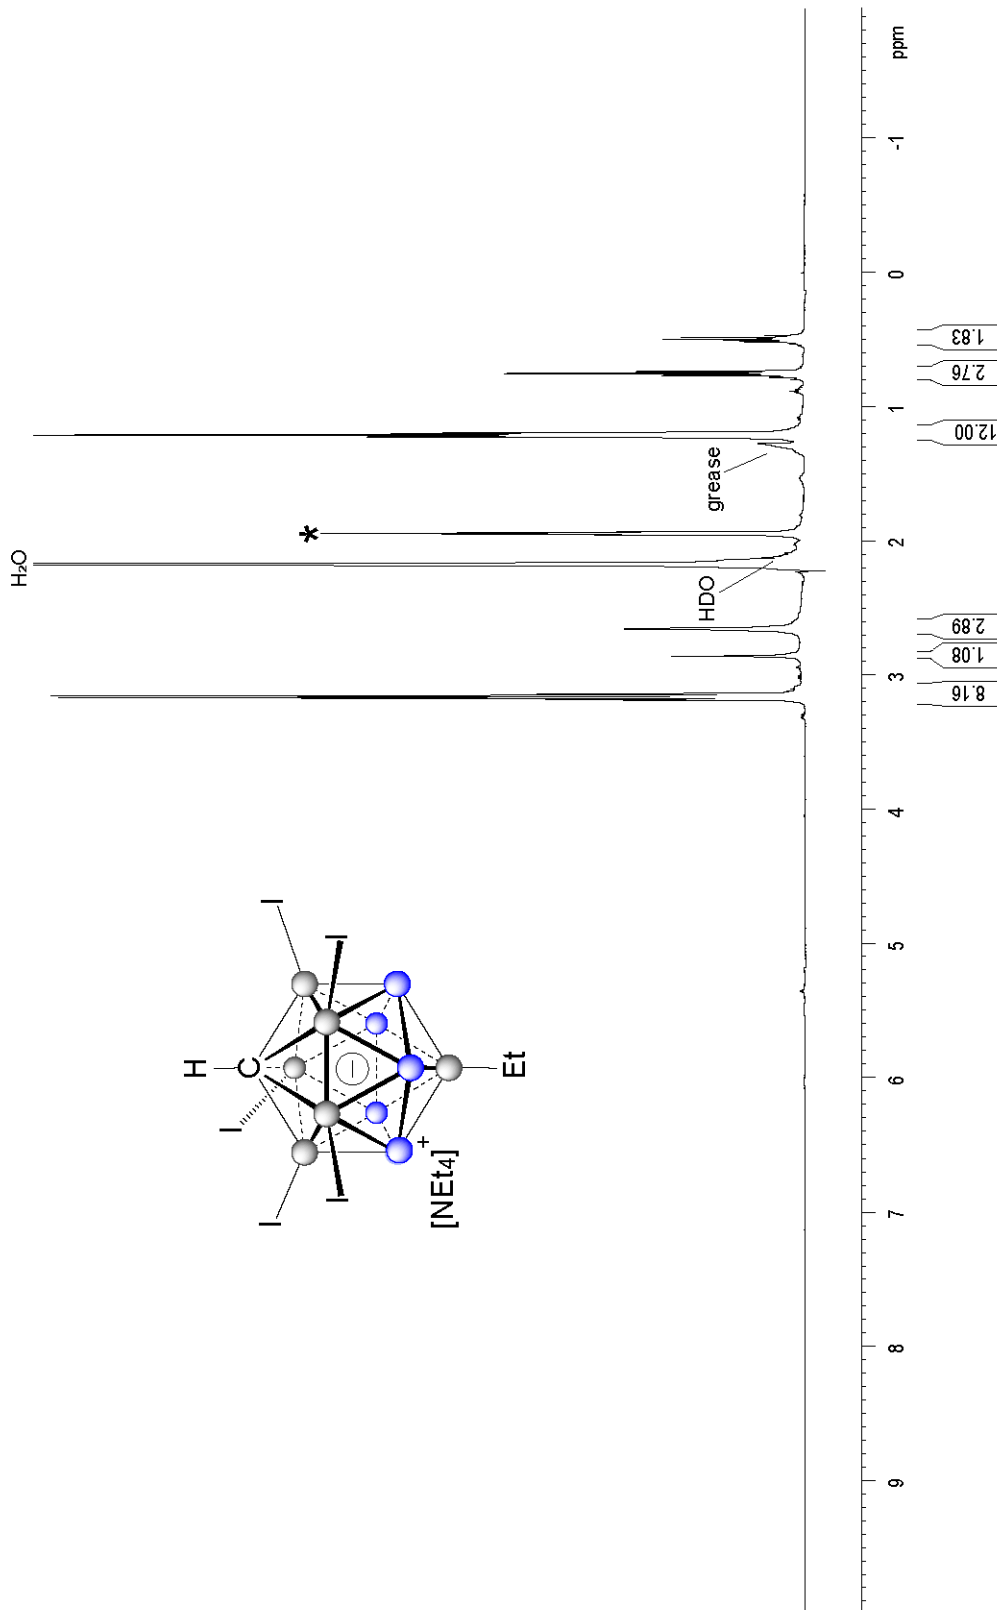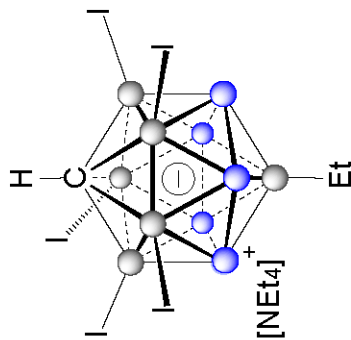

```

Current Data Parameters
NAME      11B NMR, 400M, Aceton
EXENO     2
PROCNO    1
F2 - Acquisition Parameters
Date_     20221027
Time      13.24
INSTRUM   spect
PROBHD    5 mm PABBO BB/
PULPROG   zg
TD         65536
NS         128
DS         4
SWH        25510.203 Hz
FIDRES     0.388255 Hz
AQ         1.2845056 sec
RG         193.34
DM         19.600 usec
DE         6.50 usec
TE         285.6 K
D1         1.00000000 sec
TD0        1
===== CHANNEL f1 =====
NUC1       11B
P1         9.93 usec
PLM1       52.9659960 W
SF01       128.3776052 MHz
F2 - Processing parameters
SI         32768
SF         128.3776050 MHz
WDW        EM
SSB        0
LB         10.00 Hz
GB         0
PC         1.40

```

[NEt4][2,3,4,5,6-5I-12-Et-CHB(11H5)]  
 128MHz, 1B NMR, 20mg, 0.6mL acetone-d6, 296K

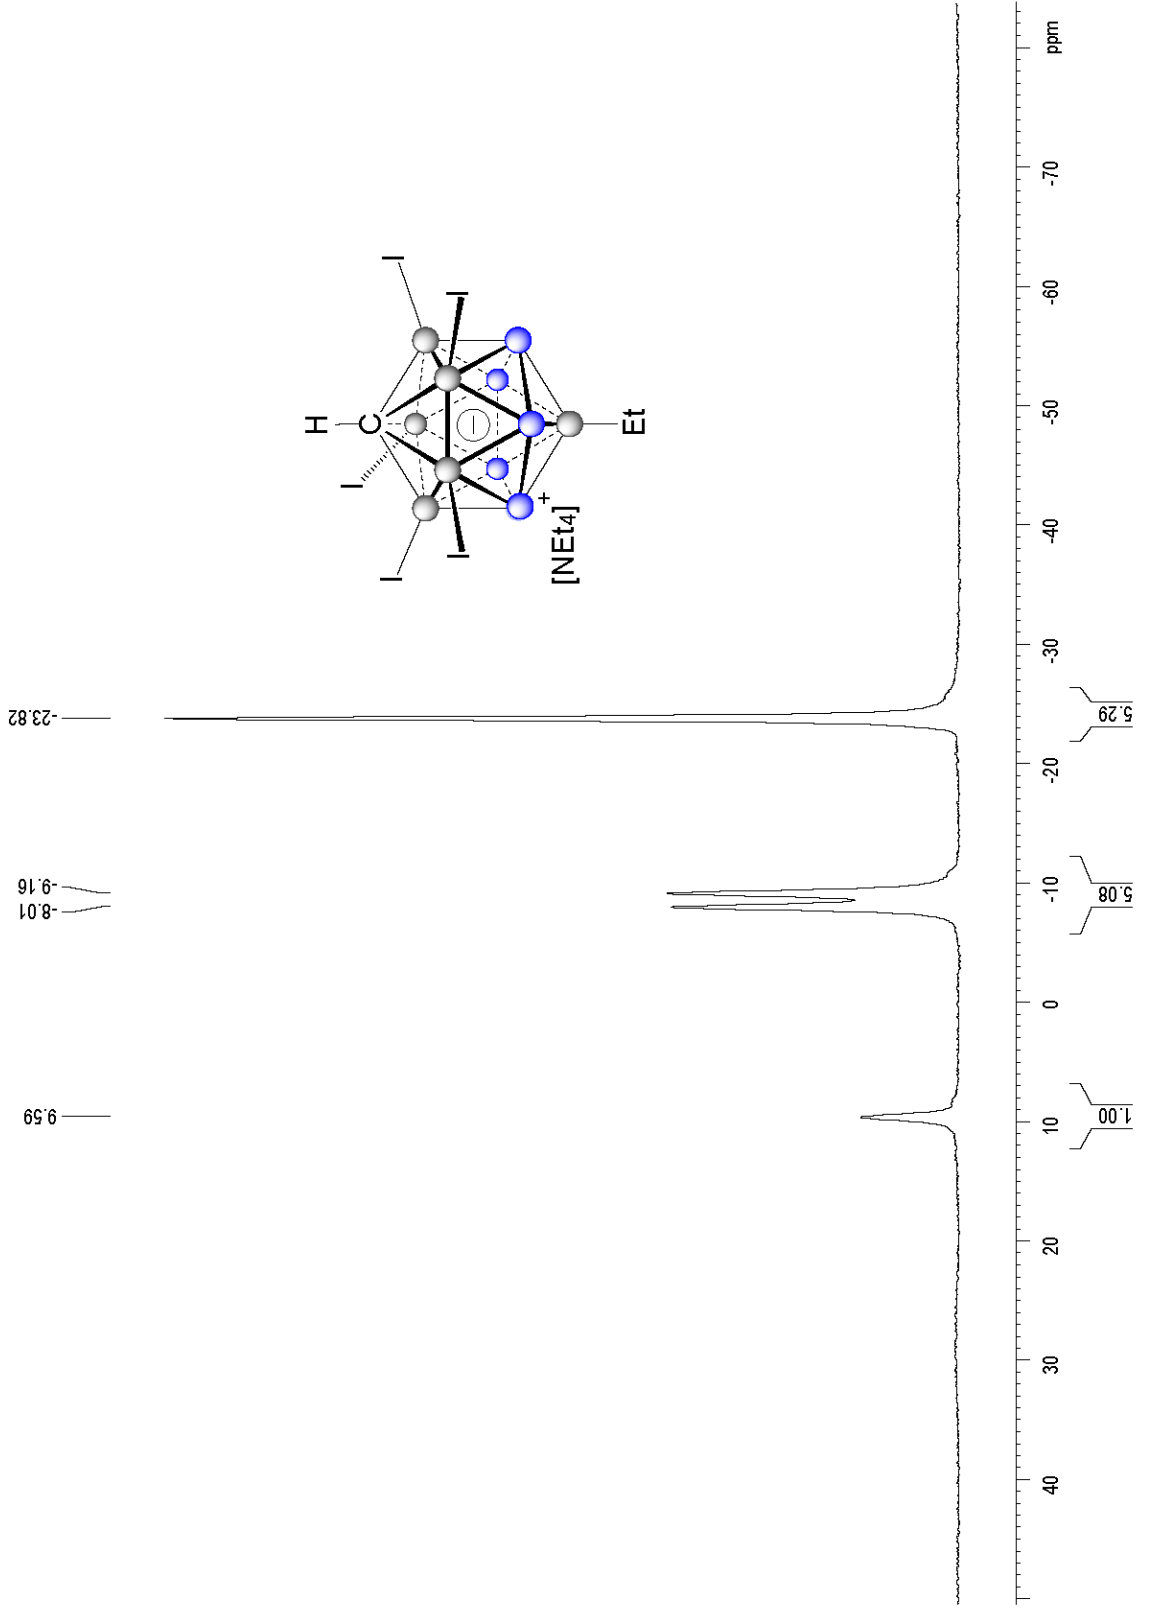

Current Data Parameters  
 NAME 11B{1H} NMR, 400M, Aceton  
 EXPNO 1  
 PROCNO 1

F2 - Acquisition Parameters  
 Date\_ 20221027  
 Time\_ 13.18  
 INSTRUM spect  
 PROBHD 5 mm PABBO BB/  
 PULPROG zgpg30  
 TD 65536  
 SOLVENT Acetone  
 NS 128  
 DS 4  
 SWH 25510.203 Hz  
 FIDRES 0.389255 Hz  
 AQ 1.2845056 sec  
 RG 193.34  
 DM 19.600 usec  
 DE 6.50 usec  
 TE 296.3 K  
 D1 1.00000000 sec  
 D11 0.03000000 sec  
 TDO 1

===== CHANNEL f1 =====  
 NUC1 11B  
 P1 9.03 usec  
 PL1 52.9659060 W  
 SF01 128.3776050 MHz

===== CHANNEL f2 =====  
 CPDPRG2 waltz16  
 NUC2 1H  
 PCPD2 80.00 usec  
 PLM2 12.50000000 W  
 PLM12 0.43945000 W  
 PLM13 0.28125000 W  
 SF02 400.1320007 MHz

F2 - Processing parameters  
 SI 32768  
 SF 128.3776050 MHz  
 WDW EM  
 SSB 0  
 LB 10.00 Hz  
 GB 0  
 PC 1.40

[NEt4][2,3,4,5,6-5i-12-Et-CHB11H5]  
 128MHz, 11B{1H} NMR, 20mg, 0.6mL acetone-d6\*, 296K

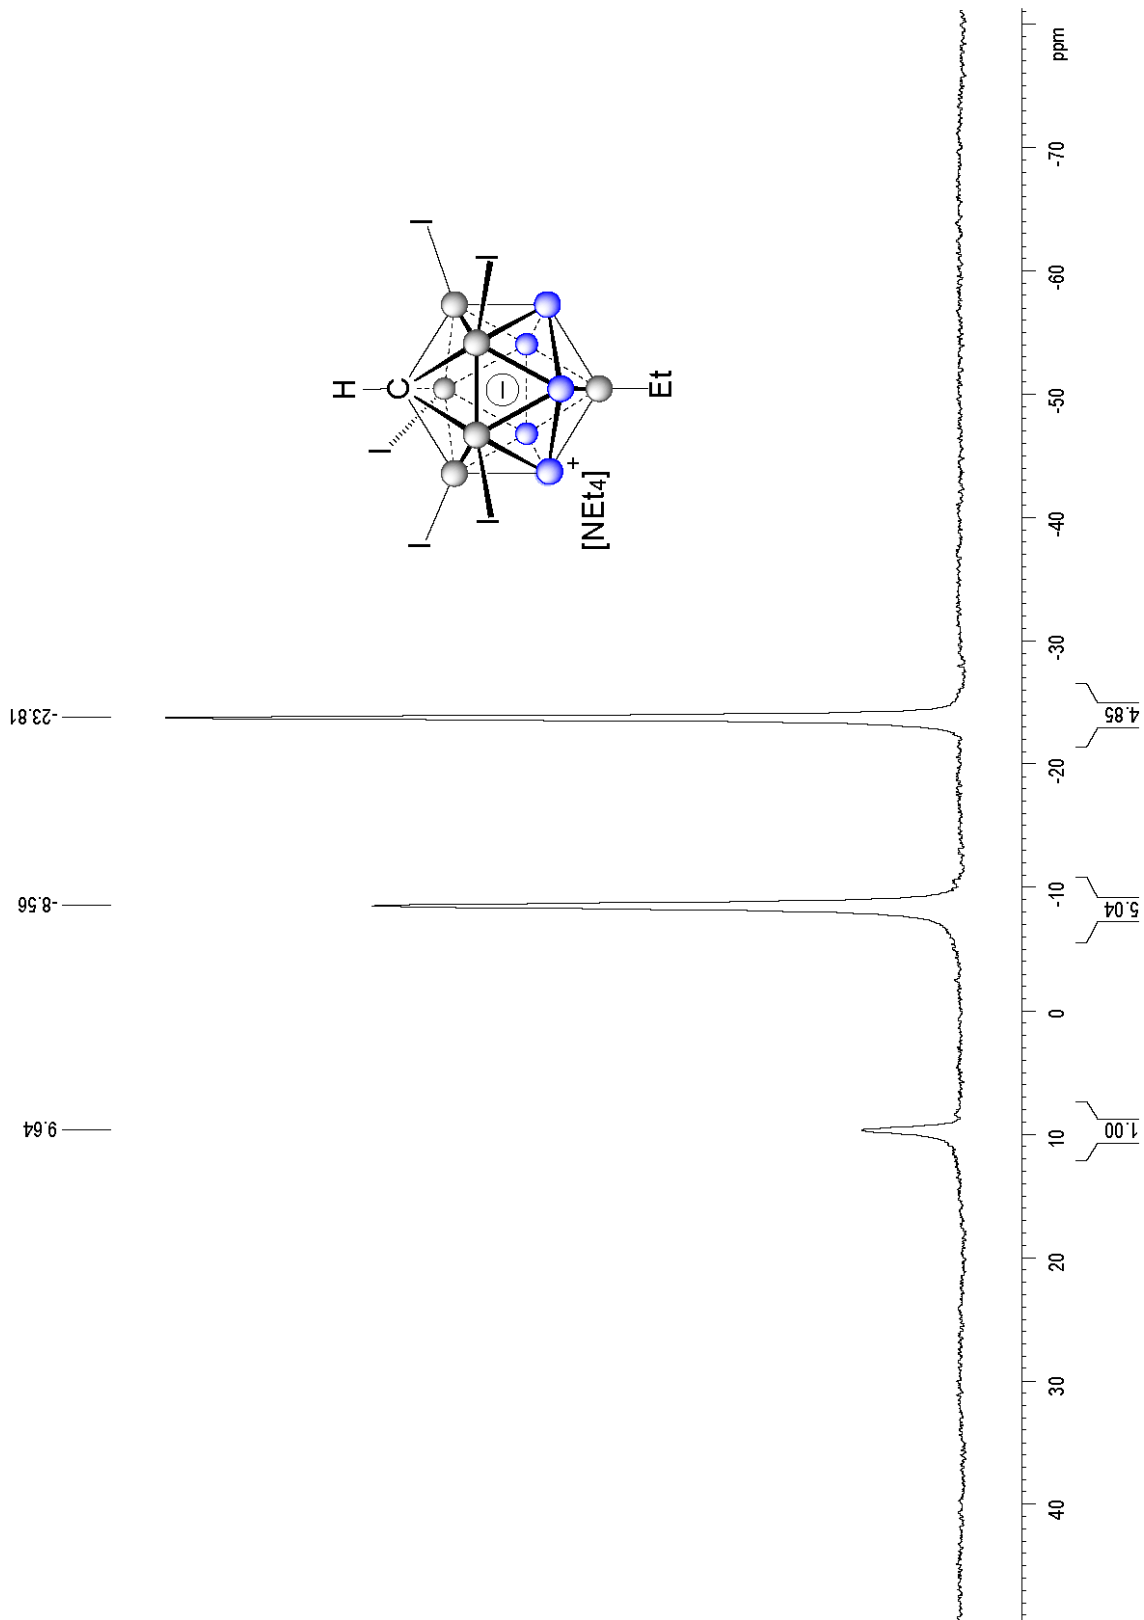

Current Data Parameters  
 NAME 13C{1H} NMR, 400M, Aceton  
 EXNO 5  
 PROCNO 1

[NEt<sub>4</sub>][2,3,4,5,6-5i-12-Et-CB11H6]  
 101M, 13C{1H} NMR, 20mg, 0.5 mL acetone-d<sub>6</sub>, 296K

F2 - Acquisition Parameters  
 Date\_ 20221010  
 Time 6.18  
 INSTRUM spect  
 PROBHD 5 mm PABBO BE/  
 PULPROG zgpg30  
 TD 65536  
 SOLVENT Acetone  
 NS 1024  
 DS 4  
 SWH 29761.904 Hz  
 FIDRES 0.454151 Hz  
 AQ 1.1010048 sec  
 RG 193.34  
 DW 16.800 usec  
 DE 6.50 usec  
 TE 298.17 K  
 D1 1.50000000 sec  
 D11 0.03000000 sec  
 TDO 1

==== CHANNEL f1 =====  
 NUC1 13C  
 P1 10.00 usec  
 PLW1 53.0000000 W  
 SFO1 100.6228293 MHz

==== CHANNEL f2 =====  
 CDEPRG[2] waitz16  
 NUC2 1H  
 PCPD2 80.00 usec  
 PLW2 12.50000000 W  
 PLW12 0.43945000 W  
 PLW13 0.28125000 W  
 SFO2 400.1316005 MHz

F2 - Processing parameters  
 SI 32768  
 SF 100.6126837 MHz  
 WDW EM  
 SSB 0  
 LB 10.00 Hz  
 GB 0  
 PC 1.40

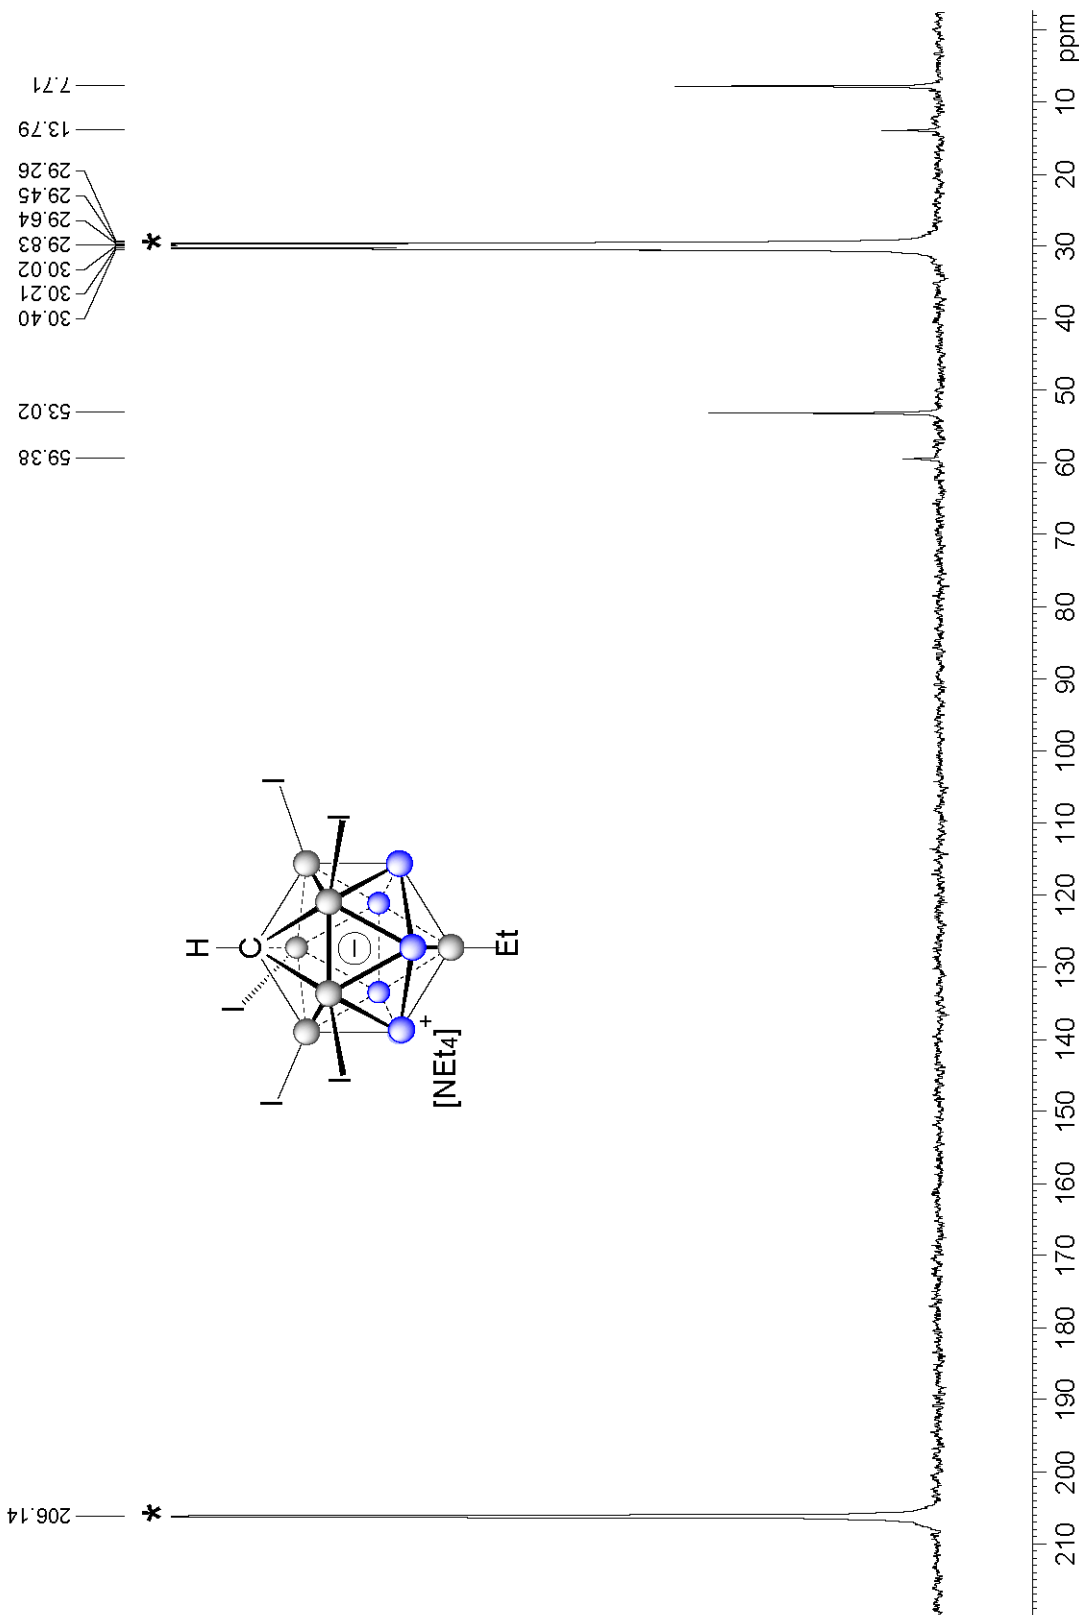



[NEt4][2,3,4,5,6-5I-12-Et-CHB11H5]  
 400MHz, 101MHz, HSQC NMR, 20mg, 0.6mL CD3CN, 296K

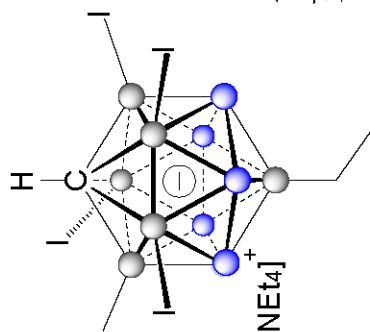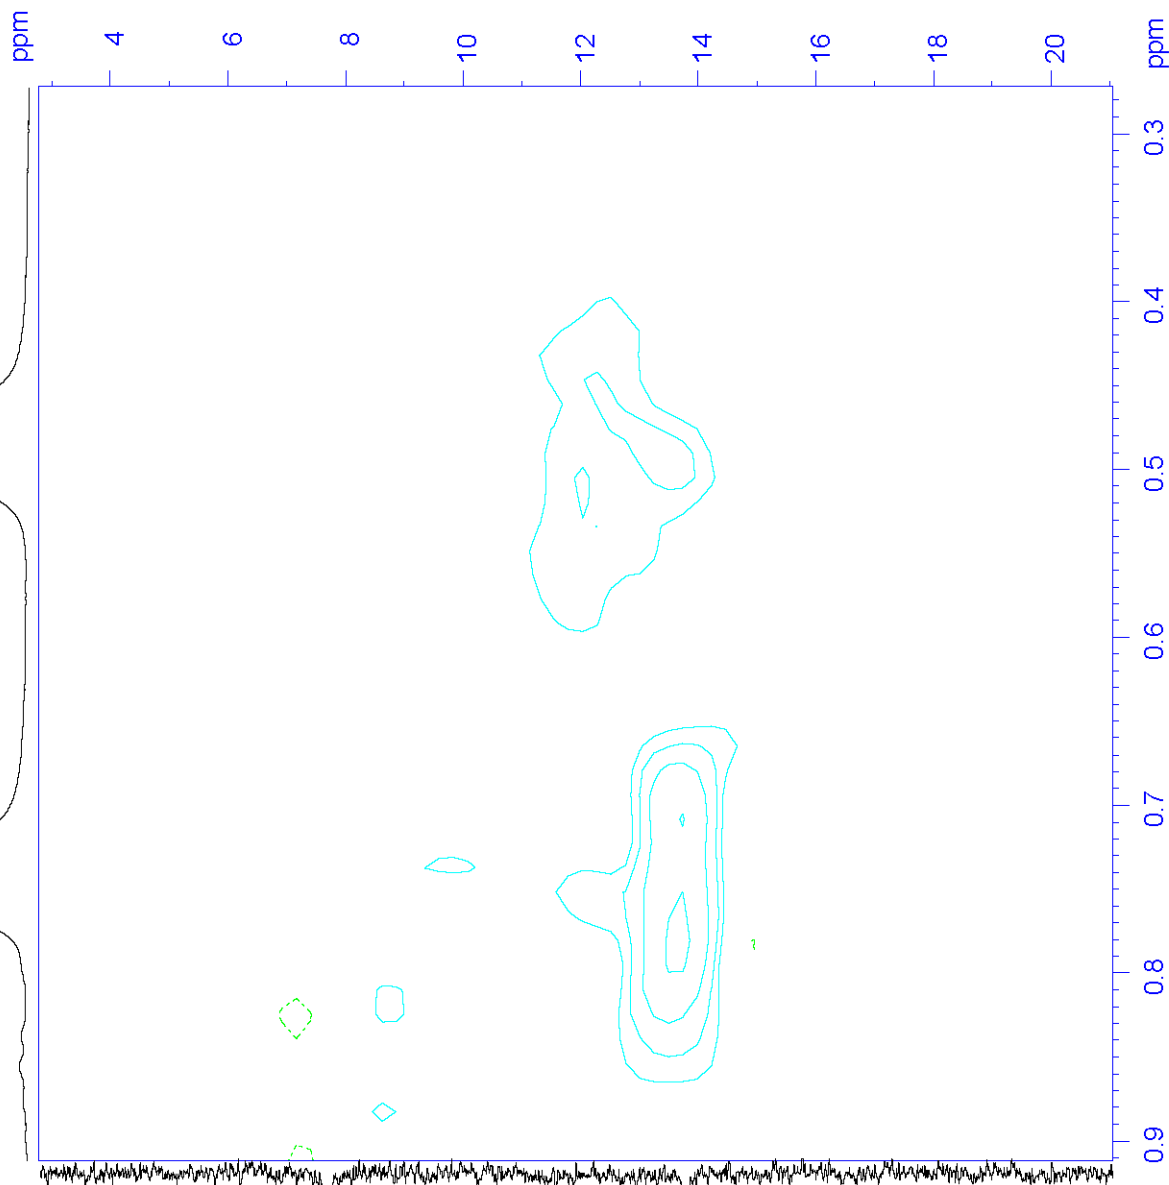

```

Current Data Parameters
NAME          Et
EXPNO        4
PROCNO       1

F2 - Acquisition Parameters
Date_         20221101
Time_        21:20
INSTRUM      spect
PROBHD       5 mm PABBO BE/
PULPROG      hsqcetgpr12
AQ           1.824
SOLVENT      CD3CN
NS           16
DS           16
SWH          6009.615 Hz
FIDRES       5.868765 Hz
AQ           0.0851968 sec
RG           193.54
DW           83.500 usec
DE           264.55
TE           296.2 K
CONST2       145.0000000
D0           0.00000300 sec
D1           1.50000000 sec
D4           0.00172414 sec
D11          0.03000000 sec
D16          0.00020000 sec
DELTA        0.0008607 sec
ZGPGPTNS     0.00001990 sec

===== CHANNEL f1 =====
NUC1          1H
P1           15.00 usec
P2           30.00 usec
P3           100.00 usec
P4           12.500000 MHz
SFO1          400.1328009 MHz

===== CHANNEL f2 =====
CPDPRG2      garp
NUC2          13C
P3           10.00 usec
P4           20.00 usec
P5           20.00 usec
PCPD2        53.00000000 sec
P1M1         1.08158995 W
P1M2         100.00000000 W
SFO2         100.6238364 MHz

===== GRADIENT CHANNEL =====
GENAM[1]     SMSQ10.100
GENAM[2]     SMSQ10.100
GENAM[3]     SMSQ10.100
GENAM[4]     SMSQ10.100
GPR2         20.10 %%
GPR3         11.00 %%
GPR4         -5.00 %%
P16          1000.00 usec
P19          600.00 usec

F1 - Acquisition parameters
AQ           100.6238 MHz
FIDRES       196.524048 Hz
SW           246.991 ppm
PRMODE       Echo-Antiecho

F2 - Processing parameters
SF           400.1300107 MHz
WDW          %SINE
SSB          2
LB           0 Hz
GB           0
PC           1.40

F1 - Processing parameters
SF           echo-anti-13c4
MC           100.6126718 MHz
WDW          %SINE
SSB          2
LB           0 Hz
GB           0
  
```

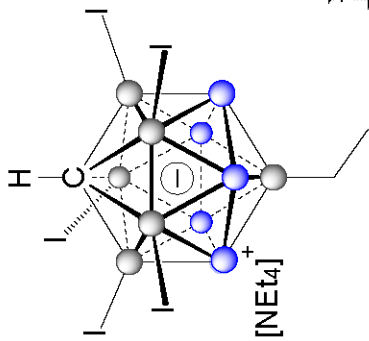

[NEt4][2,3,4,5,6-5I-12-Et-CHB11H5]  
400MHz, 101MHz, HMBC NMR, 20mg, 0.6mL CD3CN, 296K

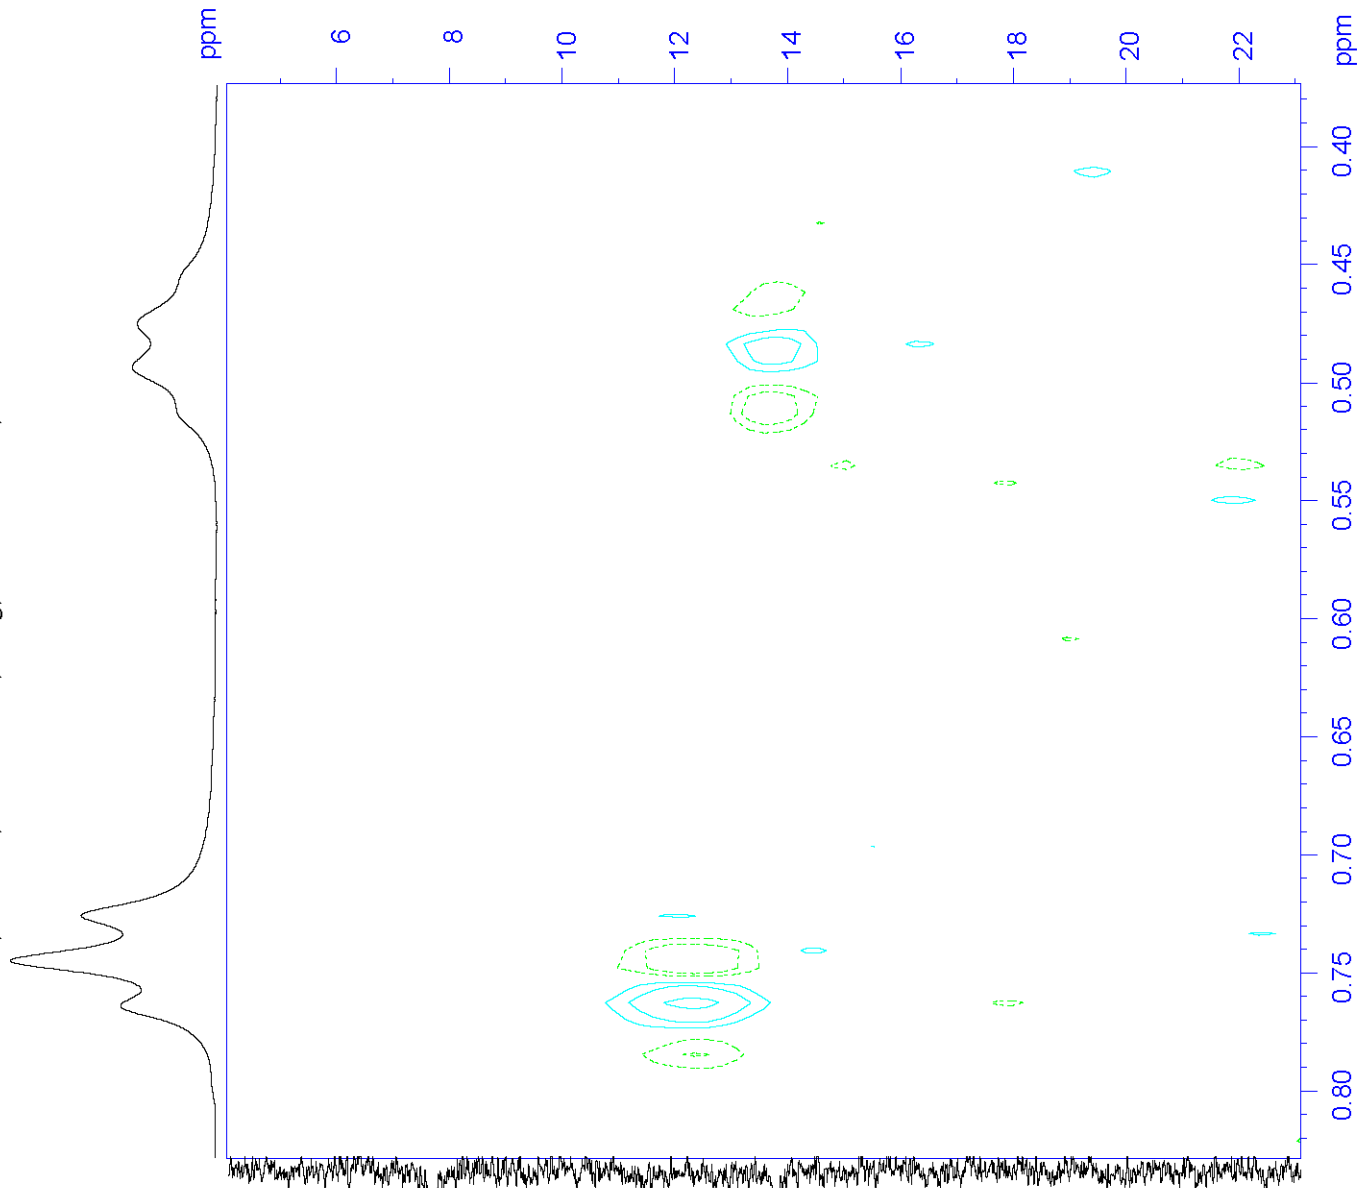

```

Current Data Parameters
NAME      Et3
EXPNO    3
PROCNO   1

F2 - Acquisition Parameters
Date_    20221101
Time     21.35
INSTRUM  5 mm F4BBO BB7
PROBHD   hmbcetgp13hd
PULPROG  zgpg30
TD        65536
SOLVENT  CD3CN
NS        4
DS        4
AQ        6000.616 Hz
FIDRES    0.834983 Hz
AQRES     0.1703936 sec
RG         193.334
DM         83.200 usec
DE         6.50 usec
TE        296.2 K
CNS1T6   120.0000000
CNS1T5   178.0000000
CNS1T4   8.0000000
CNS1T3   0.5981128
CNS1T0   0.000003000 sec
D0        2.000000000 sec
D1        0.062500000 sec
D6        0.000200000 sec
D16       0.000019000 sec
INO       0.000019000 sec

===== CHANNEL f1 =====
NUC1      1H
P1        15.00 usec
PL1       30.00 usec
PLW1      12.500000000 W
SF01      400.1328009 MHz

===== CHANNEL f2 =====
NUC2      13C
P2        10.00 usec
PL2       2000.00 usec
PLW2      53.000000000 W
SF02      100.6238364 MHz
SFO2      100.6238364 MHz
SFO2COMP  0.4
SFO2REF   0.500 Hz
SPW2      8.09780025 W

===== GRADIENT CHANNEL =====
GPNAM[1]  SRSQ10.100
GPNAM[3]  SRSQ10.100
GPNAM[4]  SRSQ10.100
GPNAM[5]  SRSQ10.100
GPNAM[6]  SRSQ10.100
GPZ1      80.000
GPZ2      14.000
GPZ3      14.000
GPZ4      -8.000
GPZ5      -4.000
GPZ6      -4.000
F16       1000.00 usec

F1 - Acquisition parameters
TD        65536
SF01      100.6238 MHz
FIDRES    196.528931 Hz
SW         249.997 ppm
FMODE     Echo-Antiecho

F2 - Processing parameters
SI         2048
SF         400.1301088 MHz
WDW        SINE
SSB        4
LB         0 Hz
GB         0
PC         1.40

F1 - Processing parameters
SI         1024
MC2        echo-anticoho
SF         100.6126593 MHz
WDW        SINE
SSB        2
GB         0 Hz
PC         0
  
```

Current Data Parameters  
 NAME 1H{11B} NMR, 400M, Acetone  
 EXNO 2  
 PROCNO 1  
 F2 - Acquisition Parameters  
 Date\_ 20221010  
 Time 2.24  
 INSTRUM Spect  
 PROBHD 5 mm PABBO BB/  
 PULPROG zgpg30  
 TD 16384  
 SOLVENT Acetone  
 NS 16  
 DS 4  
 SWH 8012.820 Hz  
 FIDRES 0.489064 Hz  
 AQ 1.0223616 sec  
 RG 193.34  
 DW 62.400 usec  
 DE 6.50 usec  
 TE 296.2 K  
 D1 1.00000000 sec  
 D11 0.03000000 sec  
 TDO 1

===== CHANNEL f1 =====  
 NUC1 1H  
 P1 15.00 usec  
 PL1 12.5000000 W  
 SFO1 400.1320007 MHz

===== CHANNEL f2 =====  
 CPDPRG2 garp4  
 NUC2 11B  
 P2 90.00 usec  
 PL2 52.9659960 W  
 PL12 0.64477998 W  
 SFO2 128.3776050 MHz

F2 - Processing parameters  
 SI 32768  
 SF 400.1300073 MHz  
 WDM 0  
 SSB 0  
 LB 1.00 Hz  
 GB 0  
 PC 1.40

[NEt4][2,3,4,5,6-5I-12-Ph-CB11H6]  
 400M, 1H{11B} NMR, 4mg, 0.5 mL acetone-d6\*, 296K

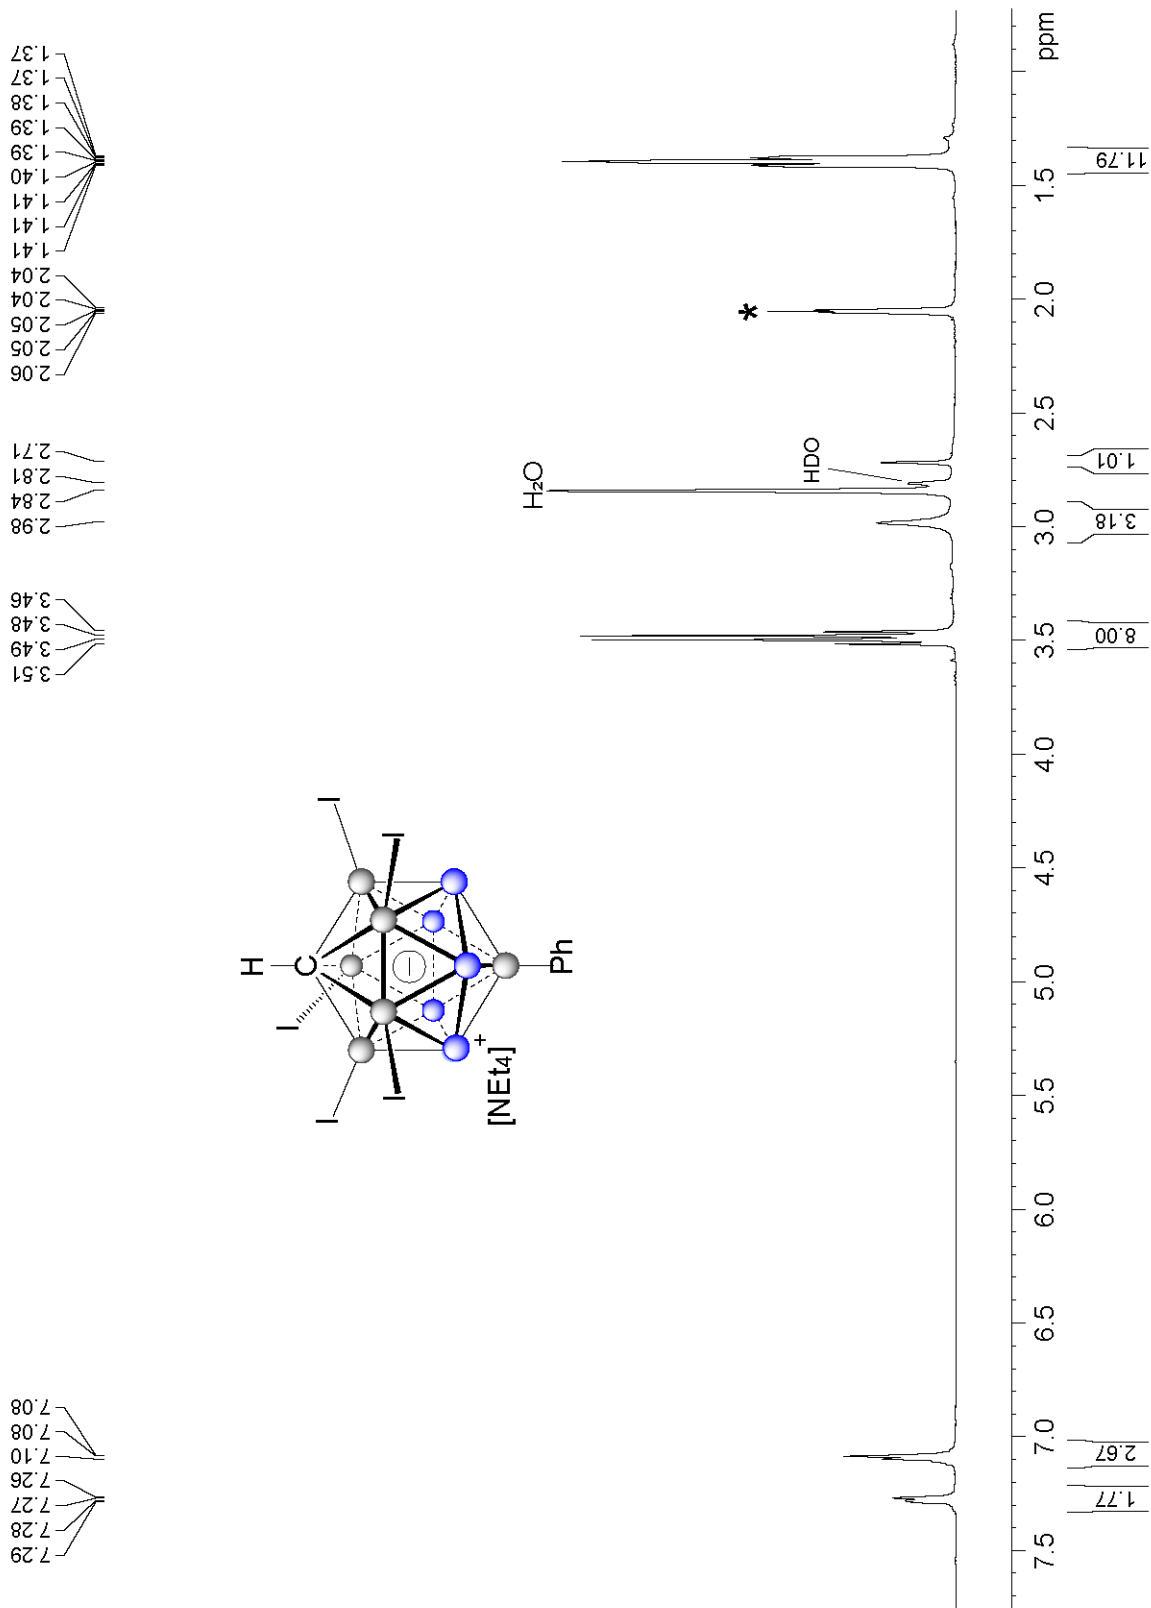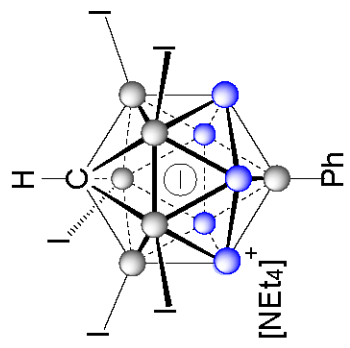

[NEt4][2,3,4,5,6-5l-12-Ph-CHB11H5]  
 128MHz, 11BNMR, 19 mg, 0.6mL Acetone-d6, 296K

```

Current Data Parameters
NAME      11B NMR, 40UM, Acetone
EXPNO     2
PROCNO    1
F2 - Acquisition Parameters
Date_     20221026
Time      21.32
INSTRUM   spect
PROBHD    5 mm PABBO BB/
PULPROG   zg
TD         65536
SOLVENT   Acetone
NS         128
DS         4
SWH        25510.203 Hz
FIDRES     0.389255 Hz
AQ         1.2845056 sec
RG         193.34
DM         19.600 usec
DE         6.50 usec
TE         295.8 K
D1         1.00000000 sec
TD0        1

===== CHANNEL f1 =====
NUC1       11B
P1         9.93 usec
PLM1       52.9659960 W
SFO1       128.3776052 MHz

F2 - Processing parameters
SI         32768
SF         128.3776050 MHz
WDW        EM
SSB        0
LB         10.00 Hz
GB         0
PC         1.40
    
```

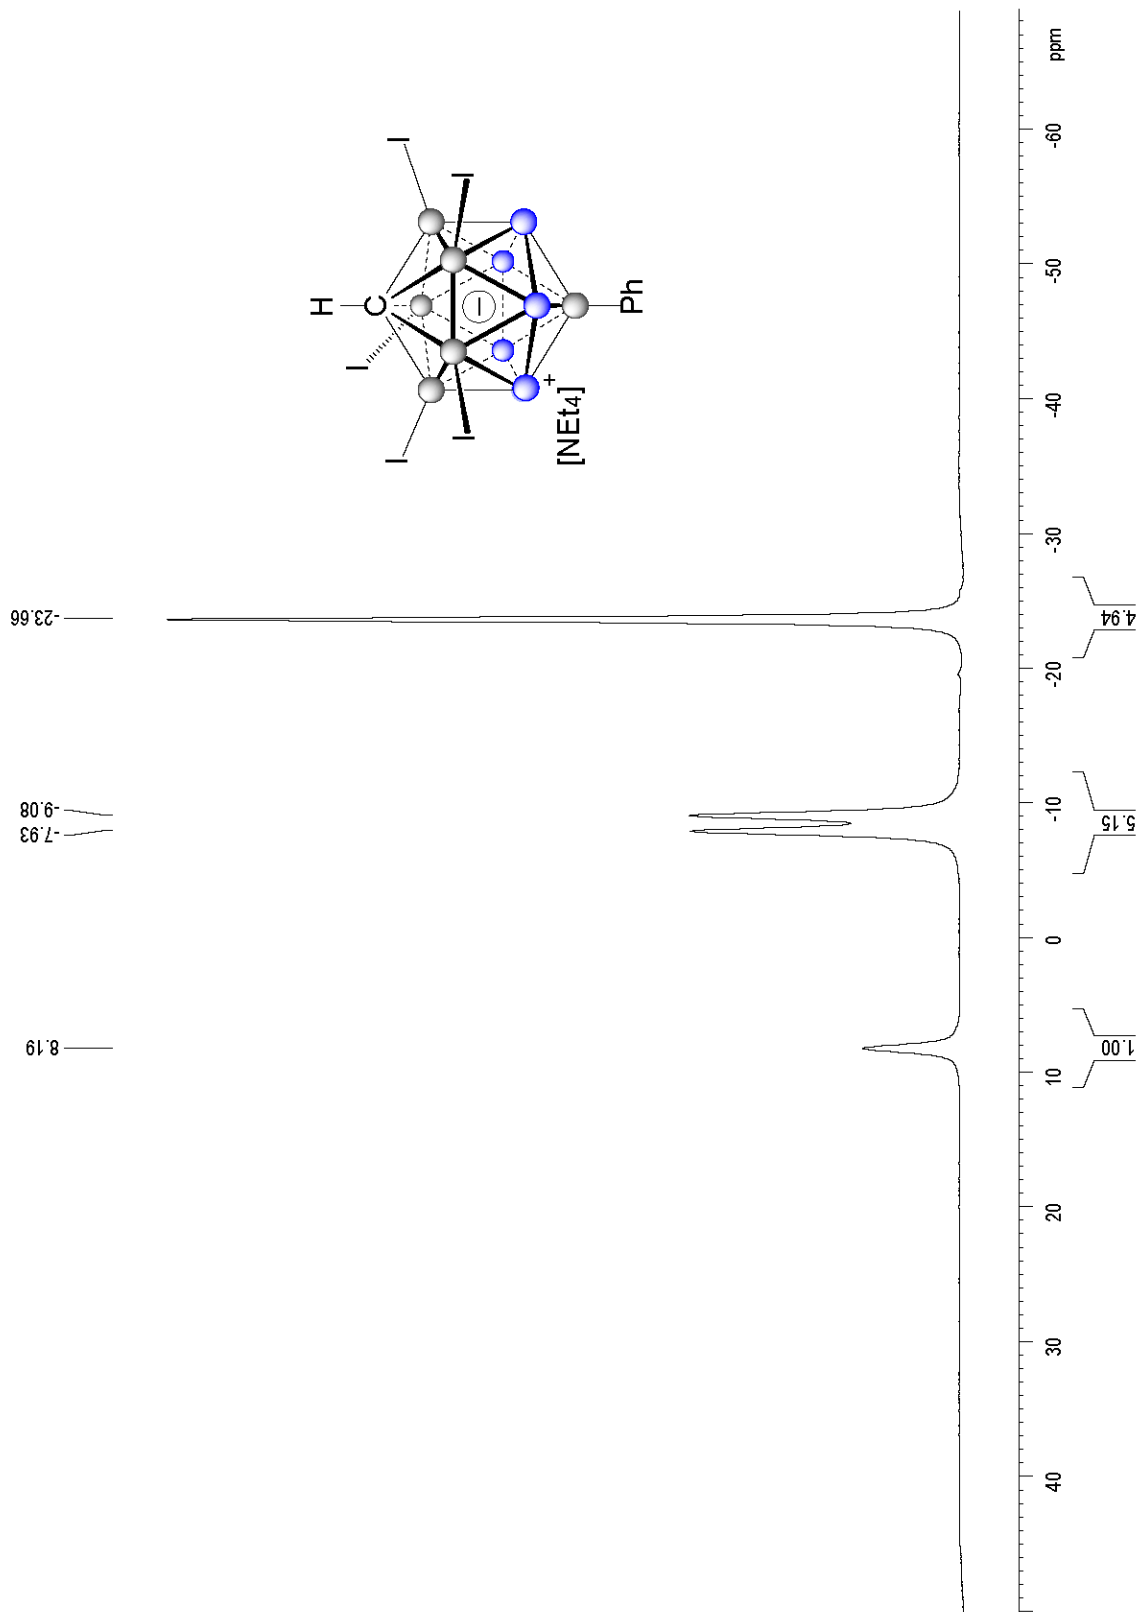

[NEt<sub>4</sub>][2,3,4,5,6-<sup>5</sup>I-12-Ph-CHB(1H<sub>5</sub>)]  
 128MHz, 11B{1H} NMR, 19 mg, 0.6mL Acetone-d<sub>6</sub>, 296K

Current Data Parameters  
 NAME 11B(1H) NMR, 400M, Acetone  
 EXFNO 1  
 PROCNO 1  
 F2 - Acquisition Parameters  
 Date\_ 20221026  
 Time 21.26  
 INSTRUM spect  
 PROBHD 5 mm PABBO BB/  
 PULPROG zgpg30  
 TD 65536  
 SOLVENT Acetone  
 NS 128  
 DS 4  
 SWH 25510.203 Hz  
 FIDRES 0.389255 Hz  
 AQ 1.2845056 sec  
 RG 193.34  
 DM 19.600 usec  
 DE 6.50 usec  
 TE 296.6 K  
 D1 1.0000000 sec  
 D11 0.0300000 sec  
 TDO 1

==== CHANNEL f1 =====  
 NUC1 11B  
 P1 9.93 usec  
 PLW1 52.9659960 W  
 SFO1 128.3776050 MHz  
 ===== CHANNEL f2 =====  
 CPDPRG2 waltz16  
 NUC2 1H  
 PCPD2 80.00 usec  
 PLW2 12.5000000 W  
 PLW12 0.43945000 W  
 PLW13 0.28125000 W  
 SFO2 400.1320007 MHz  
 F2 - Processing parameters  
 SI 32768  
 SF 128.3776050 MHz  
 WDW RM  
 SSB 0  
 LB 10.00 Hz  
 GB 0  
 PC 1.40

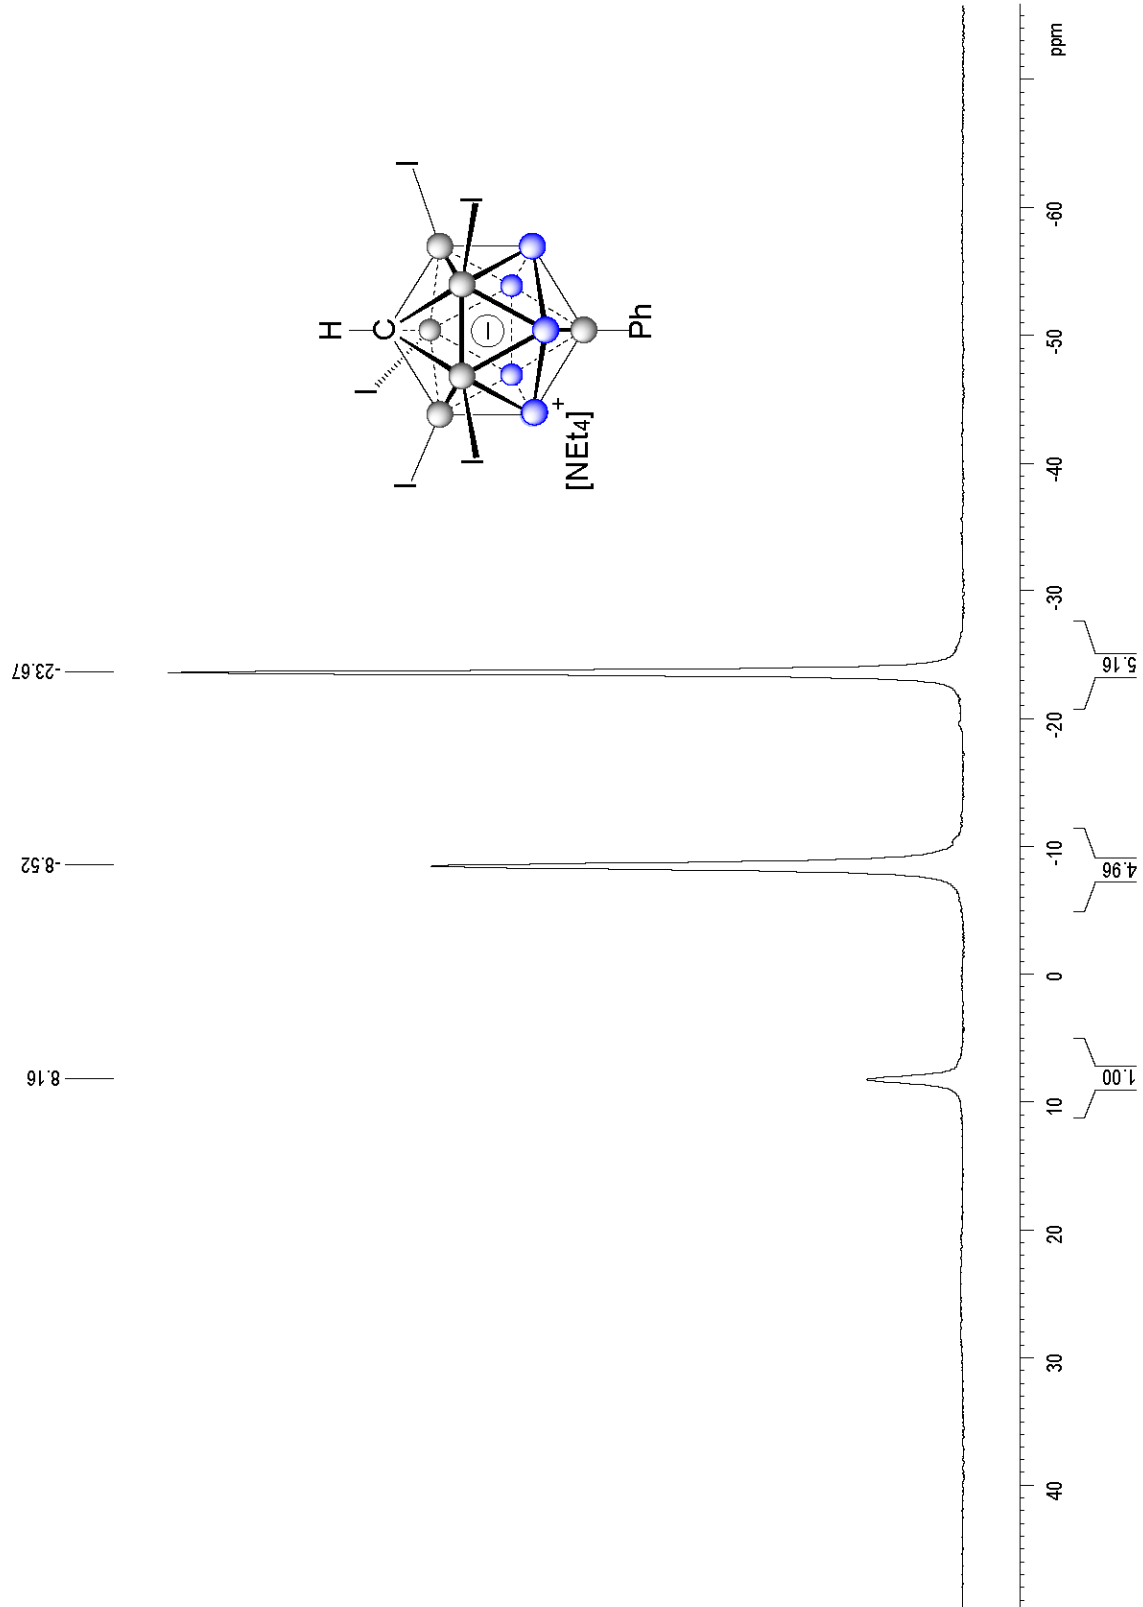

Current Data Parameters  
 NAME 13C(1H) NMR, 400M, Acetol  
 EXPNO 1  
 PROCNO 1  
 F2 - Acquisition Parameters  
 Date\_ 2022.10.23  
 Time 7:58  
 INSTRUM spect  
 PROBHD 5 mm PABBO BB/  
 PULPROG zgpg30  
 TD 65536  
 SOLVENT Acetone  
 NS 512  
 DS 4  
 SWH 29761.904 Hz  
 FIDRES 0.454131 Hz  
 AQ 1.1010048 sec  
 RG 193.34  
 DW 16.800 usec  
 DE 6.50 usec  
 TE 295.7 K  
 D1 1.50000000 sec  
 D11 0.03000000 sec  
 TDO 1  
 ===== CHANNEL f1 =====  
 NUC1 13C  
 P1 10.00 usec  
 PLW1 53.0000000 W  
 SFO1 100.6228293 MHz  
 ===== CHANNEL f2 =====  
 CPDPRG2 waltz16  
 NUC2 1H  
 PCPD2 80.00 usec  
 PLW2 12.50000000 W  
 PLW12 0.43945000 W  
 PLW13 0.28125000 W  
 SFO2 400.1316005 MHz  
 F2 - Processing parameters  
 SI 32768  
 SF 100.6126784 MHz  
 WDW EM  
 SSB 0  
 LB 1.00 Hz  
 GB 0  
 PC 1.40

[NEt4][2,3,4,5,6-5l-12-Ph-CHB11H5]  
 101MHz, 13C{1H} NMR, 60mg, 0.6mL Acetone-d6\*, 296K

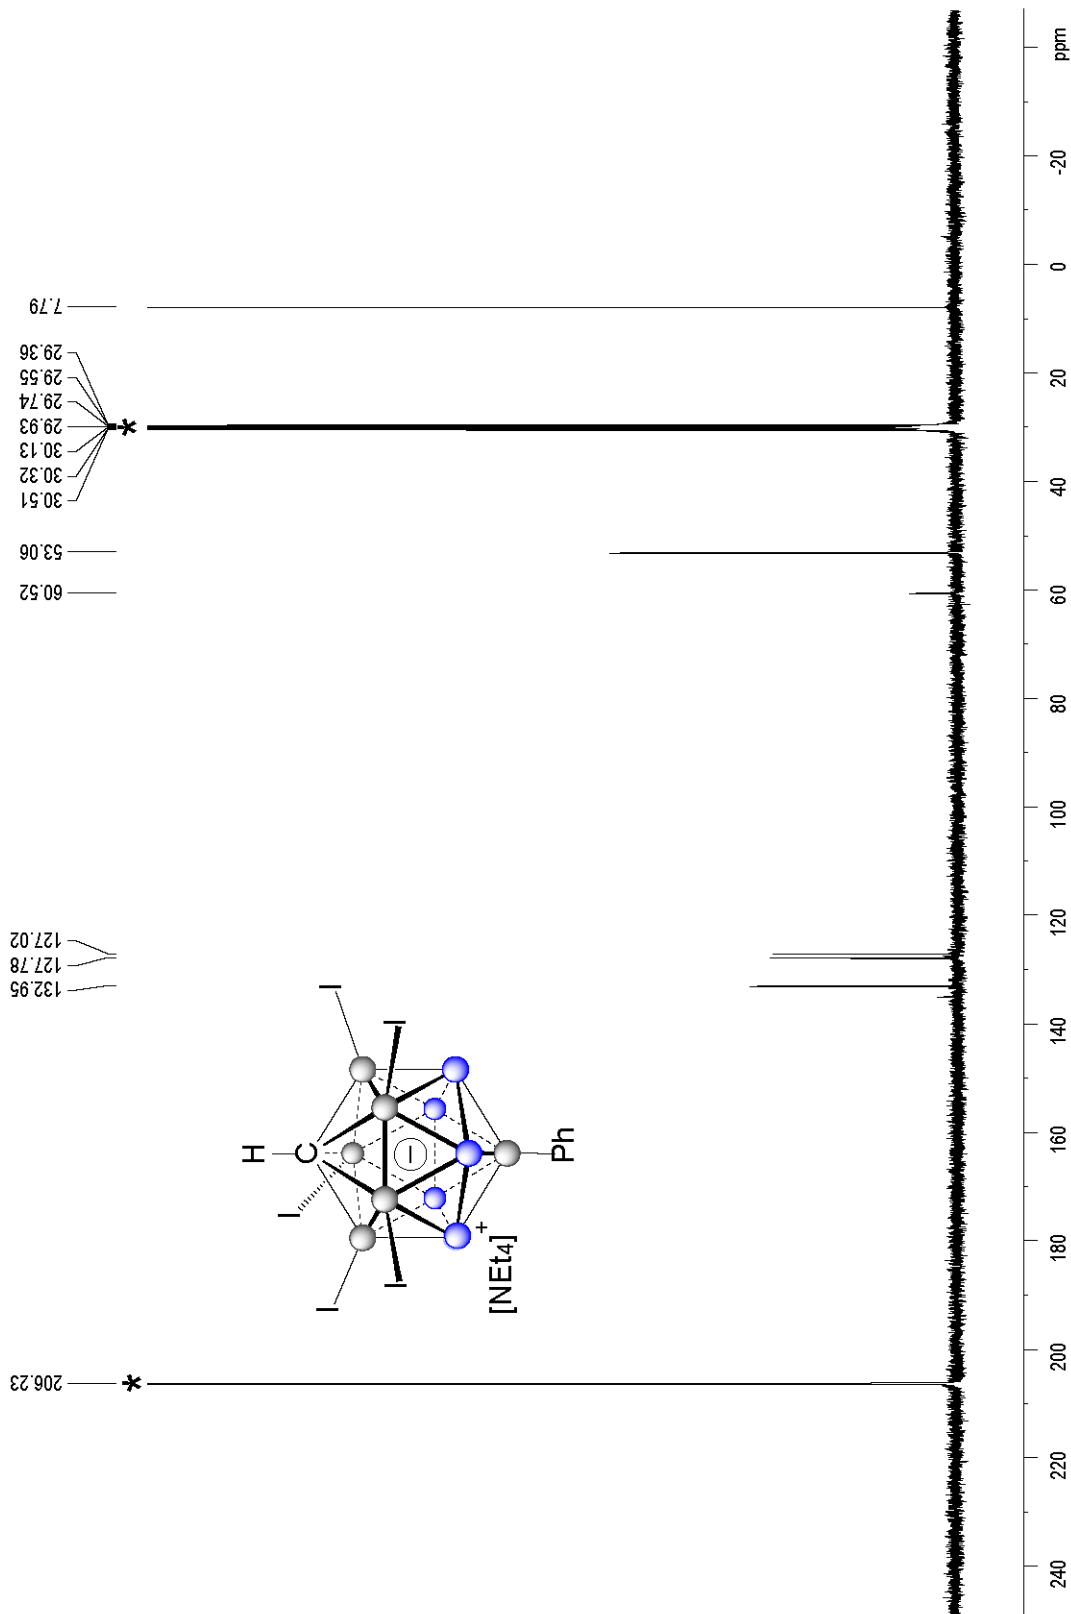

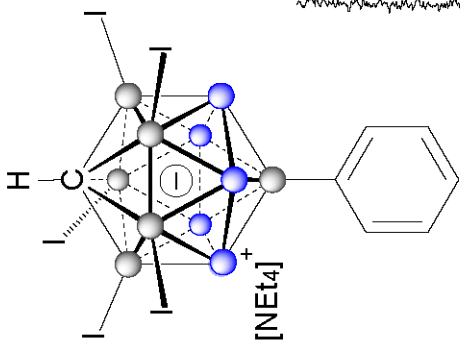

400MHz, 101MHz, HSQC NMR, 20mg, 0.6mg acetone-d<sub>6</sub>, 296K

Current Data Parameters  
 NAME HSQC [NEt4][2,3,4,5,6-5I-12-Ph-CB11H6]  
 EXPNO 2  
 PROCNO 1

F2 - Acquisition Parameters  
 Date\_ 20231027  
 Time 13:55  
 PROBHD 5 mm PABBECP12  
 PULPROG hsqcetgps12  
 TD 1024  
 SOLVENT Acetone  
 NS 2  
 DS 16  
 SMH 600.615 Hz  
 FIDRES 5.68496 Hz  
 AQ 0.081934 sec  
 RG 133.24  
 DW 83.200 usec  
 DE 6.50 usec  
 TE 296.0 K  
 CNST2 145.000000 sec  
 DU 0.0000300 sec  
 DA 0.5000000 sec  
 D1 0.0300000 sec  
 D11 0.0300000 sec  
 D16 0.0002000 sec  
 D24 0.00086207 sec  
 INU 0.00001950 sec  
 ZGPTNS

==== CHANNEL f1 =====  
 NUCL 15.0H usec  
 F2 30.00 usec  
 E28 1000.00 usec  
 PLW1 12.5000000 W  
 SFO1 400.1328009 MHz

==== CHANNEL f2 =====  
 CPDPRG2 gapp  
 P2 10.00 usec  
 P4 20.00 usec  
 PCPD2 70.00 usec  
 PLW2 53.0000000 W  
 PLW12 1.08159995 W  
 SFO2 100.6238364 MHz

==== GRADIENT CHANNEL =====  
 GENAM[1] SMSO10  
 GENAM[2] SMSO10  
 GENAM[3] SMSO10  
 GENAM[4] SMSO10  
 GEZ1 80.00 %  
 GEZ2 20.10 %  
 GEZ3 11.00 %  
 GEZ4 100.00 usec  
 P19 600.00 usec

F1 - Acquisition parameters  
 TD 856  
 SFO1 100.6238 MHz  
 FIDRES 196.584048 Hz  
 SW 249.991 ppm  
 FMODE Echo-Antiecho

F2 - Processing parameters  
 SI 1024  
 SF 400.1300079 MHz  
 MDM 2  
 LB 0 Hz  
 GB 0  
 FC 1.40

F1 - Processing parameters  
 SI 1024  
 MC2 echo-antiecho  
 SF 100.6127004 MHz  
 MDM 2  
 LB 0 Hz  
 GB 0

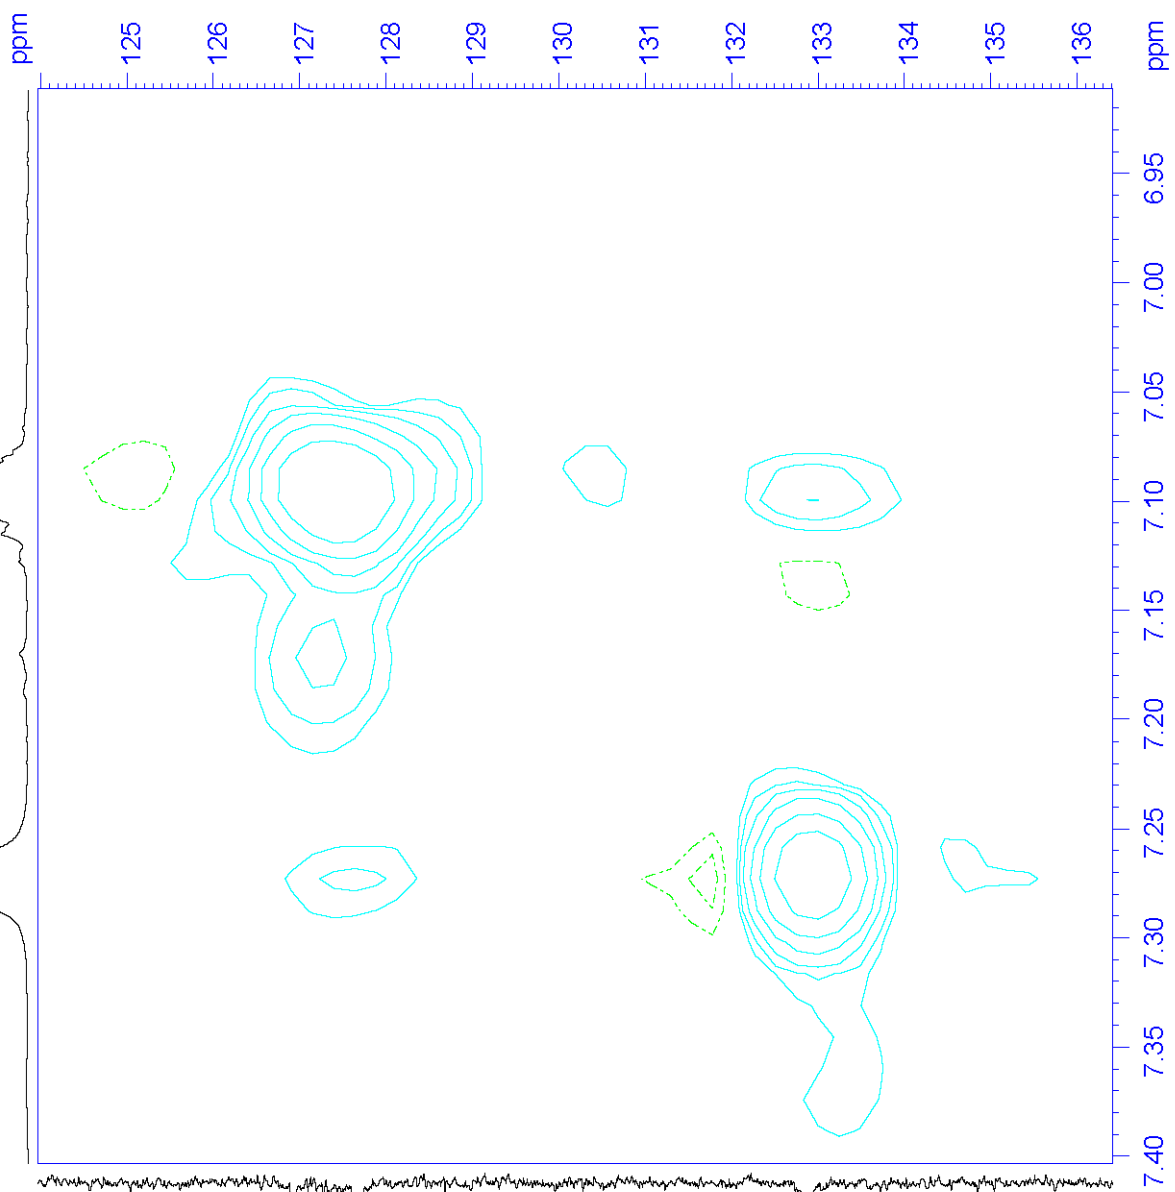

[NEt4][2,3,4,5,6-5I-12-Ph-CHB11H5]

400MHz, 101MHz, HMBc NMR, 20mg, 0.6mg acetone-d6, 296K

Current Data Parameters  
 NAME HSQC[NEt4] [2,3,4,5,6-5I-12-Ph-CB11  
 EXPNO 4  
 PROCNO 1

F2 - Acquisition Parameters  
 Date\_ 20221027  
 Time 14:41  
 INSTRUM spect  
 PROBD 5 mm PABBO BB7  
 PULPROG hmcsetgp13rd  
 TD 2048  
 SOLVENT Acetone  
 NS 4  
 DS 6009.6 Hz  
 FWH 293.482 Hz  
 FIDRES 0.1703936 sec  
 AQ 193.34  
 RG 83.200 usec  
 DM 6.50 usec  
 DE 255.8 K  
 TE 120.000000  
 CNUST6 1.000000  
 CNUST13 0.000000  
 CNUST30 0.5981128  
 D0 0.00000300 sec  
 D1 2.00000000 sec  
 D6 0.06250000 sec  
 D16 0.00020000 sec  
 IN0 0.00001990 sec

==== CHANNEL f1 ====  
 NUC1 1H  
 P1 15.00 usec  
 P2 30.00 usec  
 PLW1 12.50000000 W  
 SFO1 400.1328009 MHz

==== CHANNEL f2 ====  
 NUC2 13C  
 P3 10.00 usec  
 P4 2000.00 usec  
 PLW2 53.00000000 W  
 SFO2 100.6238364 MHz  
 SPNAM [7] Ctp60comp.4  
 SOLVENT CDCl3  
 SFO5 0.500 Hz  
 SEW7 8.09780025 W

==== GRADIENT CHANNEL =====  
 GENAM [1] SMSQ10.100  
 GENAM [3] SMSQ10.100  
 GENAM [4] SMSQ10.100  
 GENAM [5] SMSQ10.100  
 GENAM [6] SMSQ10.100  
 GEZ1 14.00 %  
 GEZ3 14.00 %  
 GEZ4 -8.00 %  
 GEZ5 -4.00 %  
 GEZ6 -2.00 %  
 P16 1000.00 usec

F1 - Acquisition parameters  
 TD 2048  
 SFO1 100.6238 MHz  
 FIDRES 196.528931 Hz  
 SW 249.997 ppm  
 FMODE Echo-Antiecho

F2 - Processing parameters  
 SI 2048  
 SF 400.1300068 MHz  
 MDMW 4  
 SBB 0 Hz  
 LB 0 Hz  
 GB 1.40  
 PC 1.40

F1 - Processing parameters  
 SI 1024  
 MC2 echo-antiesho  
 SF 100.6126854 MHz  
 WDW Q  
 SSB 2 Hz  
 LB 0 Hz  
 GB 0

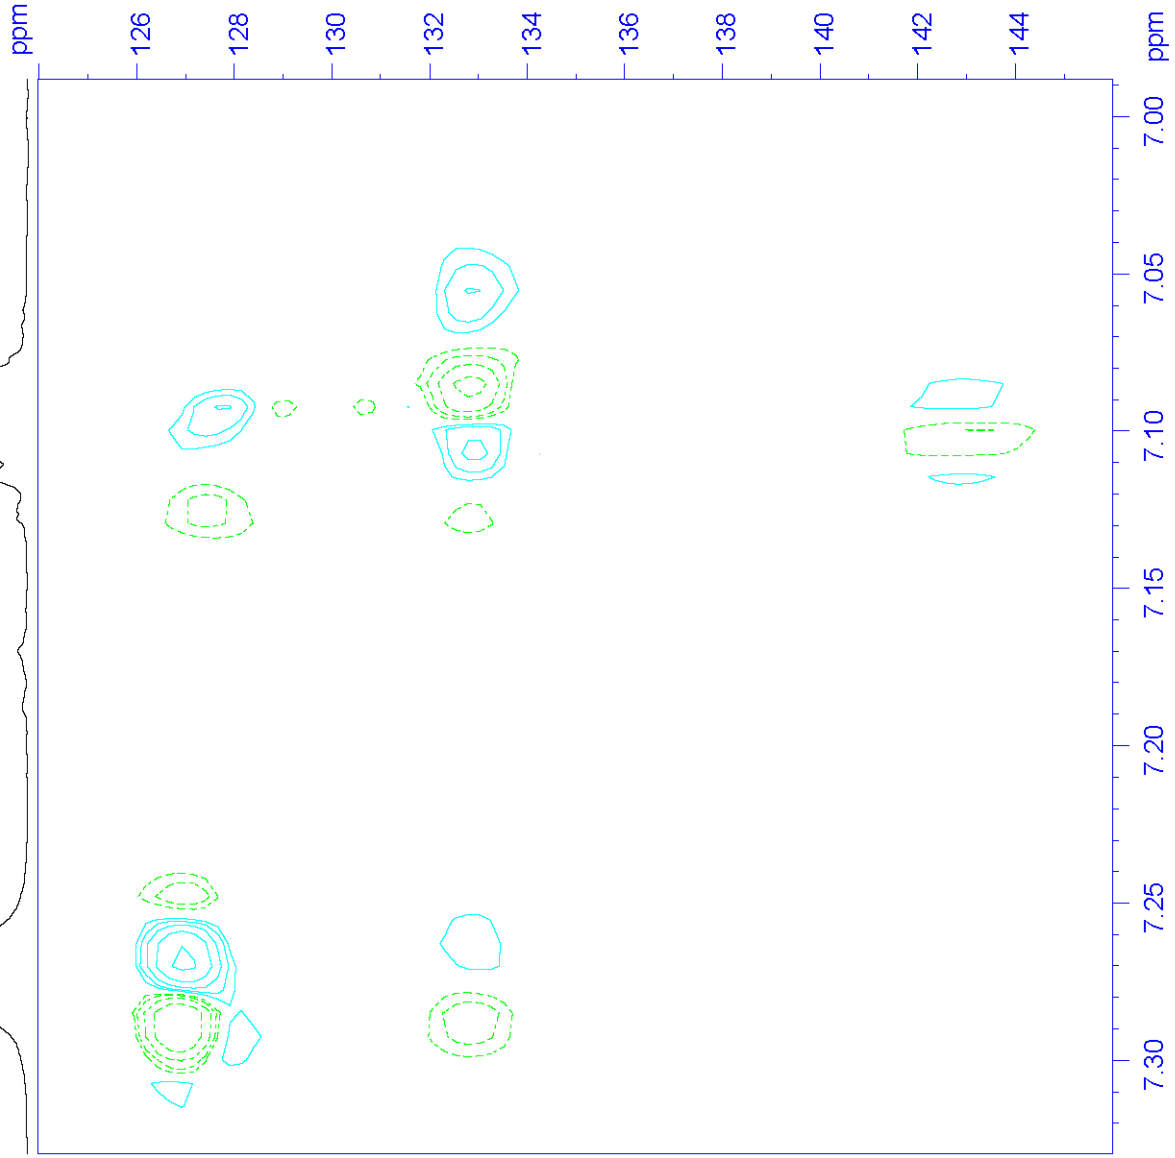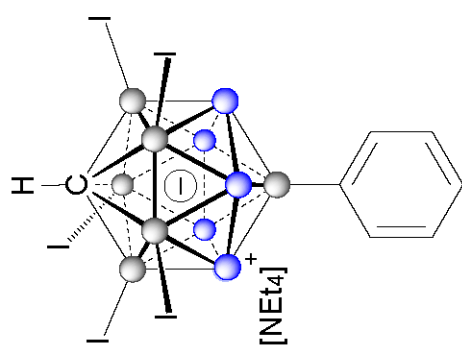



```

Current Data Parameters
NAME      1H(11B) NMR, 400M, Aceto
EXPNO     2
PROCNO    1

F2 - Acquisition Parameters
Date_     20221009
Time      15.56
INSTRUM   spect
PROBHD    5 mm PABBO BB/
PULPROG   zgpg30
D1        1.0223616 sec
SOLVENT   Acetone
NS         16
DS         4
SWH        8012.820 Hz
FIDRES     0.483064 Hz
AQ         1.0223616 sec
RG         133.34
DM         62.400 usec
DE         6.50 usec
TE         296.2 K
D11        1.0000000 sec
D111       0.03000000 sec
TD0        1

===== CHANNEL f1 =====
NUC1       1H
P1         15.00 usec
PLM1       12.5000000 W
SFO1       400.1320007 MHz

===== CHANNEL f2 =====
CPDPRG2    garp4
NUC2        11B
P2         90.00 usec
PLM2       52.9659960 W
PLM12      0.6447998 W
SFO2       128.3776050 MHz

F2 - Processing parameters
SI         32768
SF         400.1300069 MHz
WDW        EM
SSB        0
LB         1.00 Hz
GB         0
PC         1.40

```

[NEt4][2,3,4,5,6-5i-12-l-CB11H6]  
 400MHz, 1H(11B) NMR, 20mg, 0.5 mL acetone-d6\*, 296K

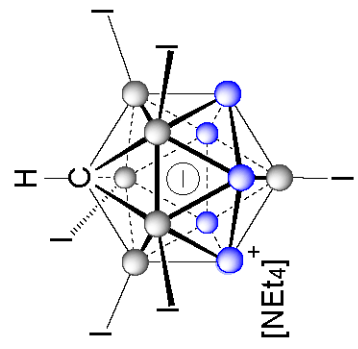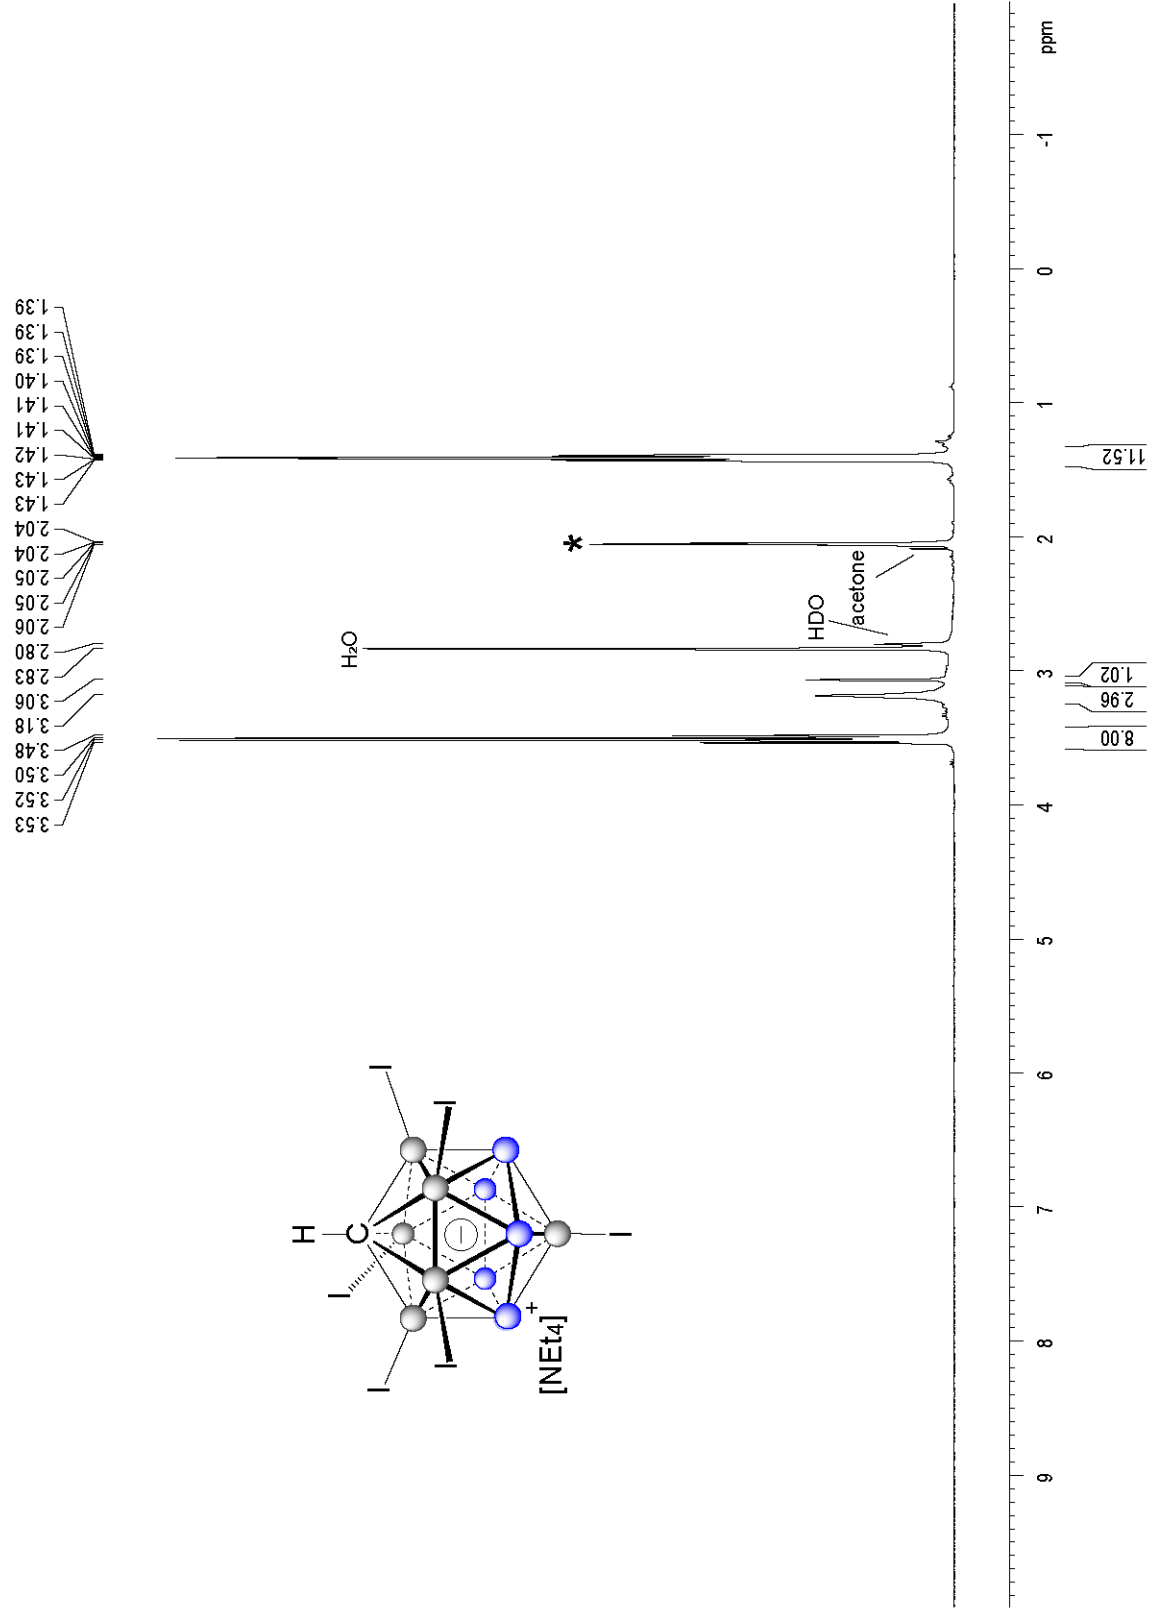

Current Data Parameters  
NAME 11B NMR, 400M, Aceton  
EXNO 2  
PROCNO 1

F2 - Acquisition Parameters  
Date\_ 20221007  
Time 16:39  
INSTRUM spect  
PROBHD 5 mm PABBO BB/  
PULPROG zg30  
TD 65536  
SOLVENT Acetone  
NS 128  
DS 4  
SWH 25510.203 Hz  
FIDRES 0.388255 Hz  
AQ 1.2845056 sec  
RG 193.34  
DM 19.600 usec  
DE 6.50 usec  
TE 285.8 K  
D1 1.00000000 sec  
TDO 1

==== CHANNEL f1 =====  
NUC1 11B  
P1 9.93 usec  
PLW1 52.96599960 W  
SFO1 128.3776052 MHz

F2 - Processing parameters  
SI 32768  
SF 128.3776050 MHz  
WDW EM  
SSB 0  
LB 1.00 Hz  
GB 0  
PC 1.40

[NEt4][2,3,4,5,6-5I-12-I-CB11H6]  
128M, 11B NMR, 20mg, 0.5 mL acetone-d6\*, 296K

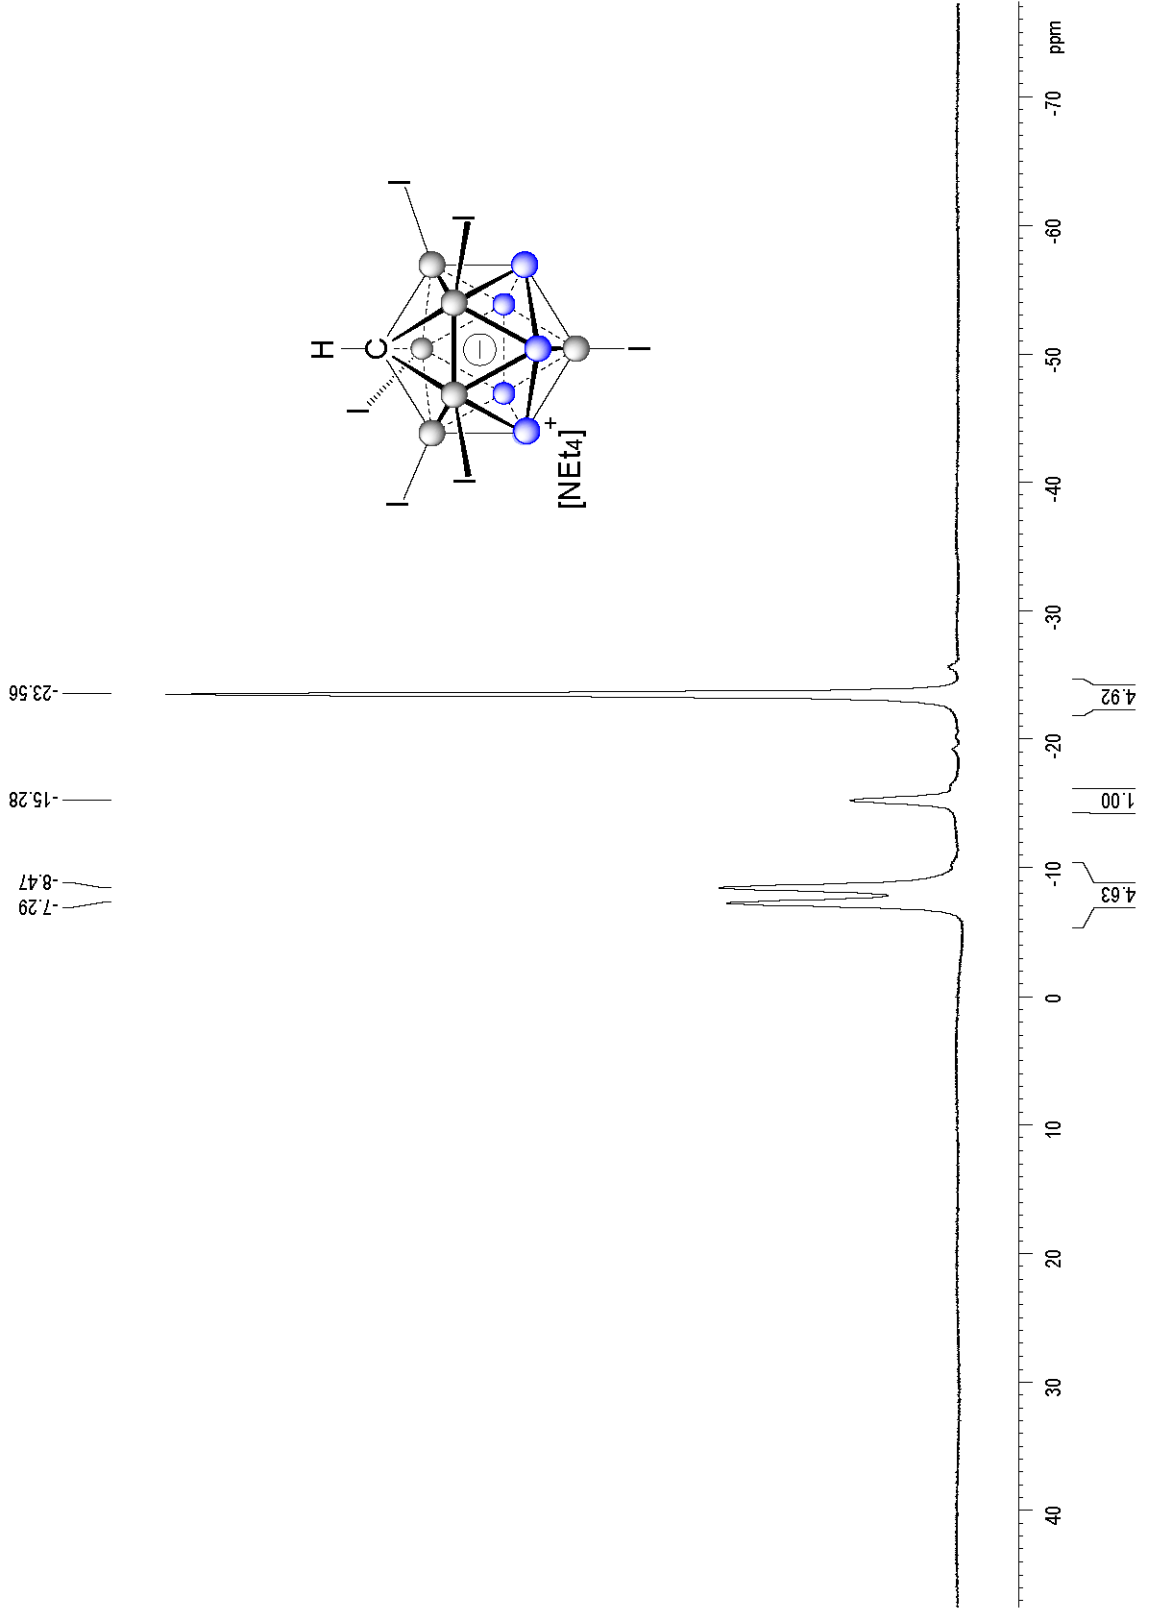

Current Data Parameters  
 NAME 11B{1H} NMR, 400M, Acetone  
 EXPNO 1  
 PROCNO 1

F2 - Acquisition Parameters  
 Date\_ 20221007  
 Time 16.33  
 INSTRUM spect  
 PROBHD 5 mm PABBO BB/  
 PULPROG zgpg30  
 TD 65536  
 SOLVENT Acetone  
 NS 128  
 DS 4  
 SWH 25510.203 Hz  
 FIDRES 0.389235 Hz  
 AQ 1.2845056 sec  
 RG 193.34  
 DM 19.600 usec  
 DE 6.50 usec  
 TE 296.6 K  
 D1 1.00000000 sec  
 D11 0.03000000 sec  
 TPO 1

==== CHANNEL f1 =====  
 NUC1 11B  
 P1 9.93 usec  
 PLW1 52.96599960 W  
 SFO1 128.3776050 MHz

==== CHANNEL f2 =====  
 CPDPRG2 waltz16  
 NUC2 1H  
 PCPD2 80.00 usec  
 PLW2 12.50000000 W  
 PLW12 0.43945000 W  
 PLW13 0.28125000 W  
 SFO2 400.1320007 MHz

F2 - Processing parameters  
 SI 32768  
 SF 128.3776050 MHz  
 WDW EM  
 SSB 0  
 LB 10.00 Hz  
 GB 0  
 PC 1.40

[NEt4][2,3,4,5,6-5i-12-i-CB11H6]  
 128M, 11B{1H} NMR, 20mg, 0.5 mL acetone-d6\*, 296K

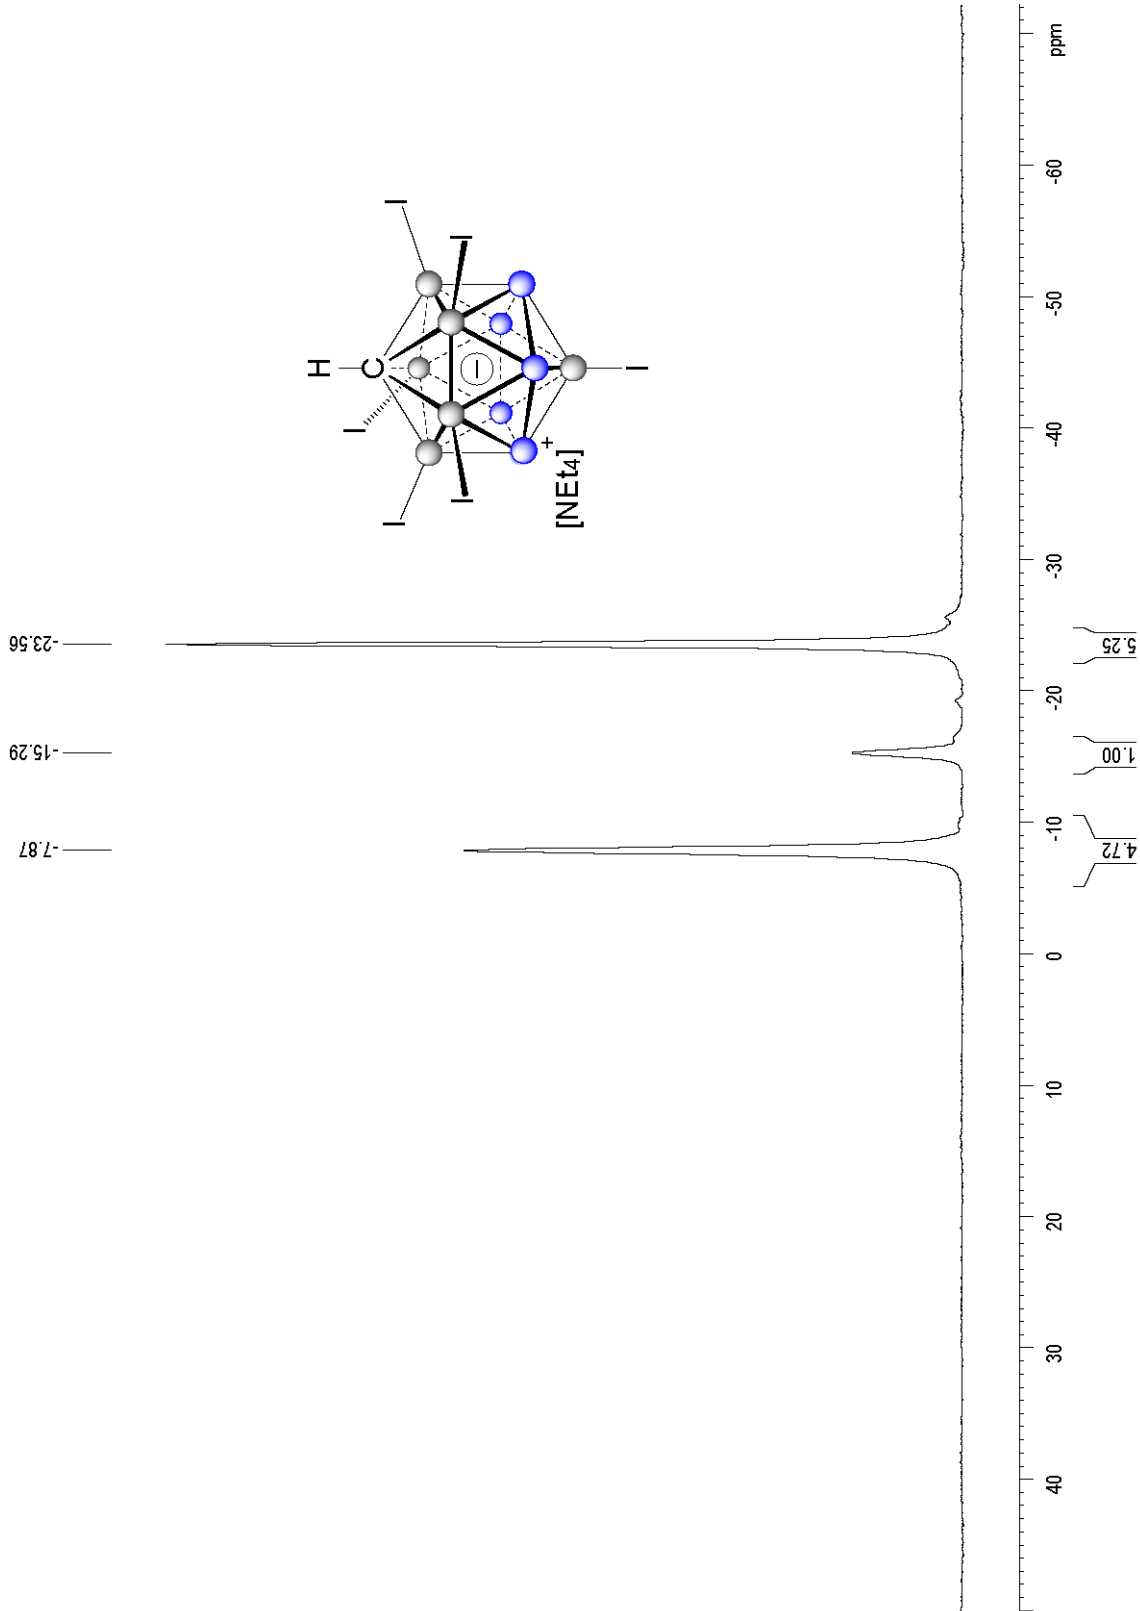

Current Data Parameters  
 NAME 13C{1H} NMR, 400M, Acetone  
 EXPNO 3  
 PROCNO 1  
 F2 - Acquisition Parameters  
 Date\_ 20221009  
 Time 16.44  
 INSTRUM spect  
 PROBHD 5 mm FAPBO BB/  
 PULPROG zgpg30  
 TD 65536  
 SOLVENT Acetone  
 NS 1024  
 DS 4  
 SWH 29761.904 Hz  
 FIDRES 0.454131 Hz  
 AQ 1.1010048 sec  
 RG 193.34  
 DW 16.800 usec  
 DE 6.50 usec  
 TE 297.1 K  
 D1 1.50000000 sec  
 D11 0.03000000 sec  
 TD0 1

==== CHANNEL F1 =====  
 NUC1 13C  
 P1 10.00 usec  
 PLW1 53.0000000 W  
 SFO1 100.628293 MHz  
 ===== CHANNEL F2 =====  
 CPDPRG2 waltz16  
 NUC2 1H  
 PCPD2 80.00 usec  
 PLW2 12.5000000 W  
 PLW12 0.43945000 W  
 PLW13 0.28125000 W  
 SFO2 400.1316005 MHz  
 F2 - Processing parameters  
 SI 32768  
 SF 100.6126813 MHz  
 WDW EM  
 SSB 0  
 LB 10.00 Hz  
 GB 0  
 PC 1.40

[NEt4][2,3,4,5,6-5I-12-I-CB11H6]  
 101M, 13C{1H} NMR, 20mg, 0.5 mL acetone-d6\*, 296K

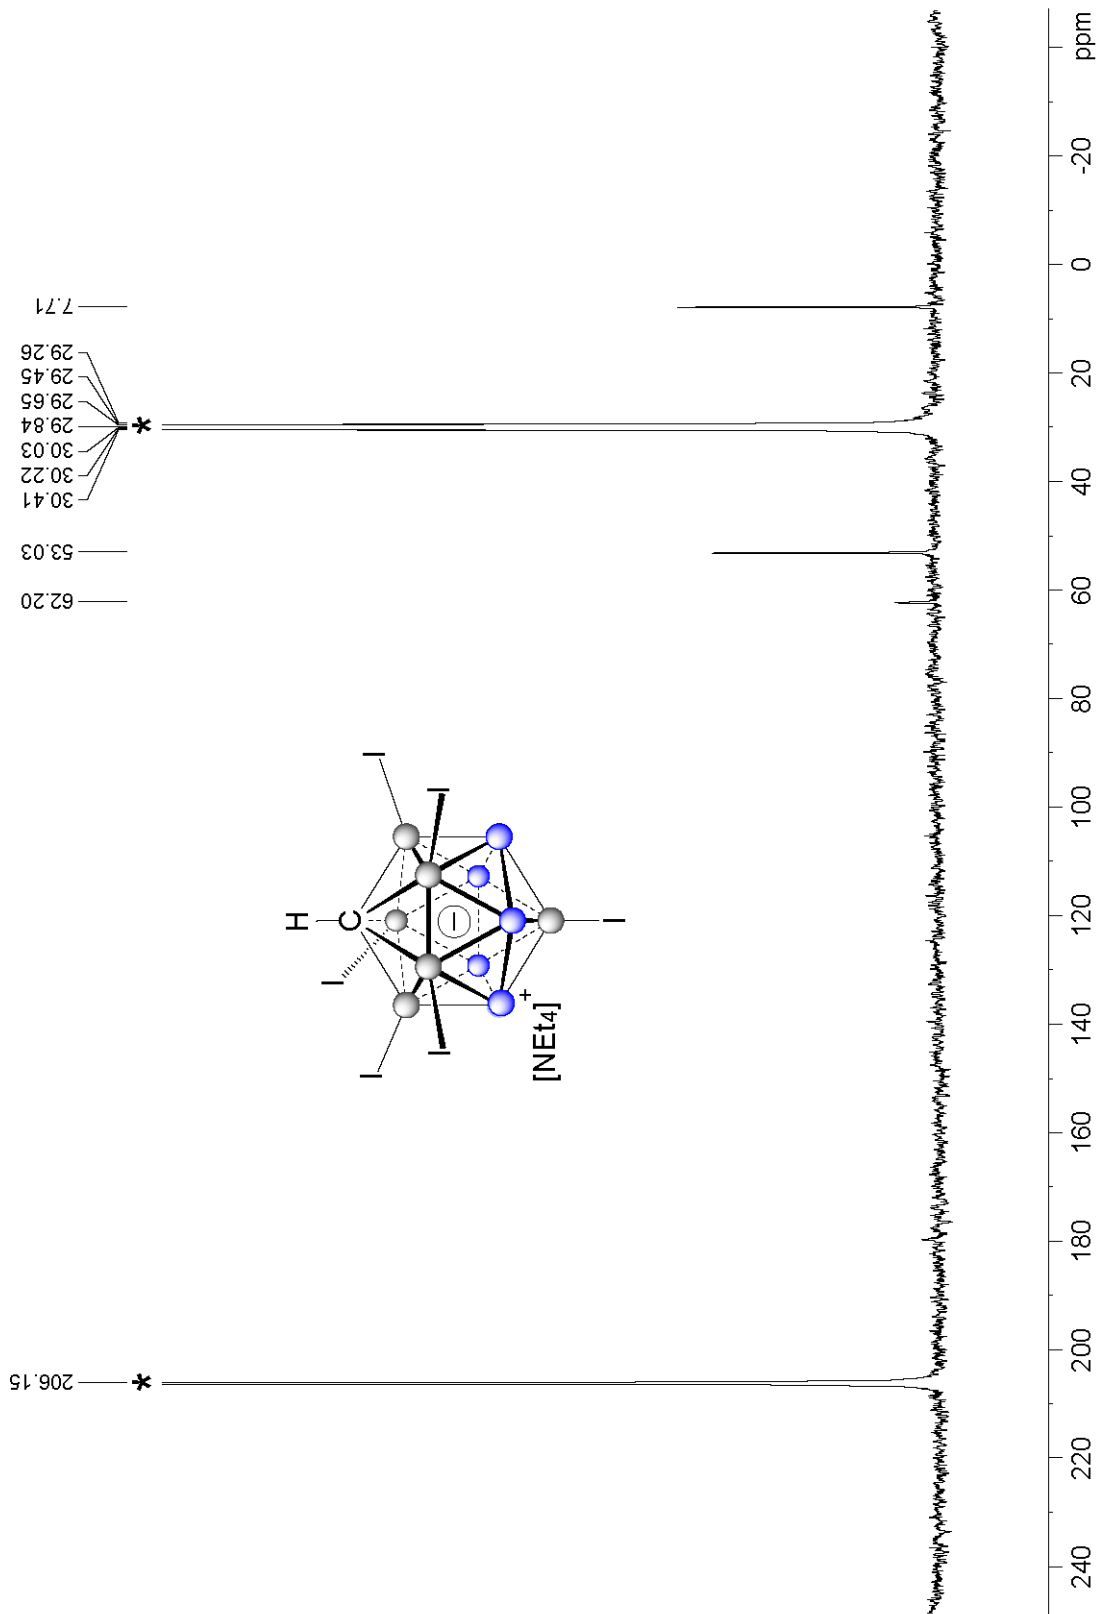

Current Data Parameters  
 NAME 1H(11B) NMR, 400M, Aceto  
 EXNO 2  
 PROCNO 1

F2 - Acquisition Parameters  
 Date\_ 20221011  
 Time 7.17  
 INSTRUM spect  
 PROBRD 5 mm PABBO BB/  
 FULLPROG zgpg30  
 TD 16384  
 SOLVENT CD3CW  
 NS 16  
 DS 4  
 SWH 8012.820 Hz  
 FIDRES 0.489064 Hz  
 AQ 1.0223616 sec  
 RG 193.34  
 DM 62.400 usec  
 DE 6.50 usec  
 TE 295.0 K  
 D1 1.00000000 sec  
 D11 0.03000000 sec  
 TDO 1

==== CHANNEL f1 =====  
 NUC1 1H  
 P1 15.00 usec  
 PLW1 12.50000000 W  
 SFO1 400.1320007 MHz  
 ===== CHANNEL f2 =====  
 CPDPRG2 garp4  
 NUC2 11B  
 P2 90.00 usec  
 PLW2 52.96599960 W  
 PLW12 0.64477998 W  
 SFO2 128.3776050 MHz  
 F2 - Processing parameters  
 SI 32768  
 SF 400.1300000 MHz  
 WDW EM  
 SSB 0  
 LB 1.00 Hz  
 GB 0  
 PC 1.40

[NEt4][2,3,4,5,6,5l-12-Br-CB11H6]  
 400MHz, 1H{11B} NMR, 5mg, 0.5mL Acetonitrile-d3, 296K

3.21  
3.19  
3.18  
3.16  
3.10  
3.01  
2.19  
1.98  
1.97  
1.96  
1.26  
1.25  
1.25  
1.24  
1.23  
1.22  
1.22  
1.21

H<sub>2</sub>O

grease

\*

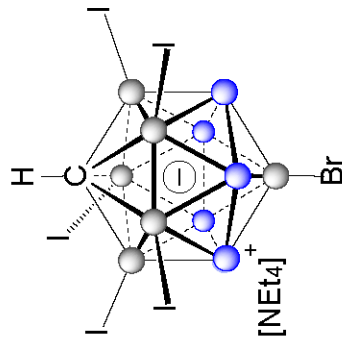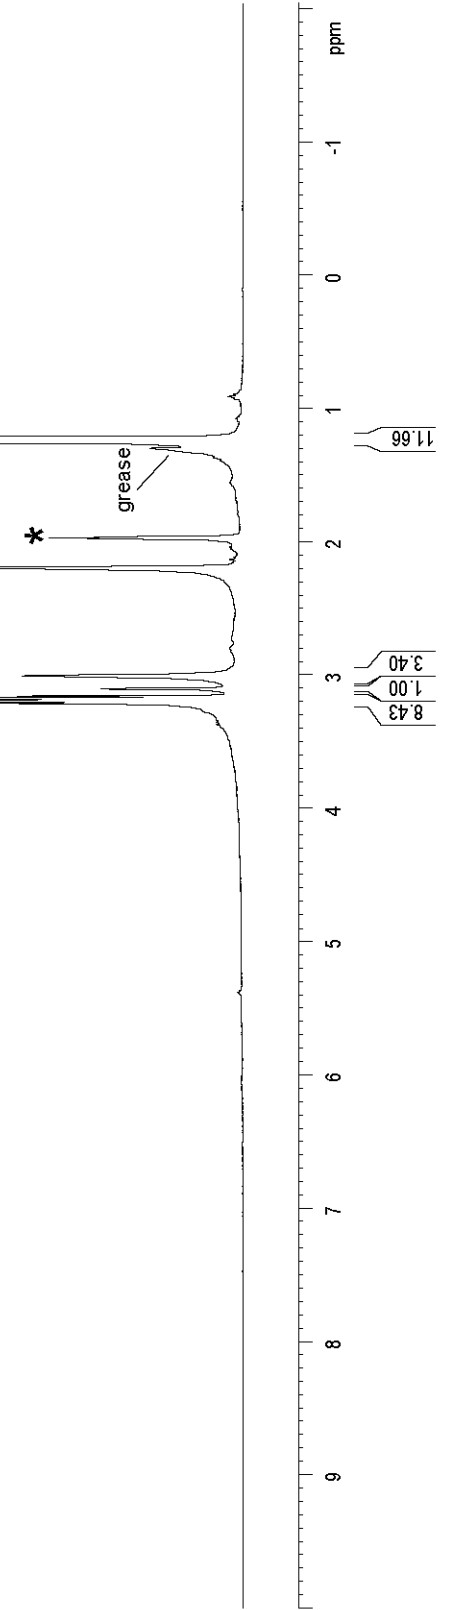

```

Current Data Parameters
NAME      11B NMR, 500M, Acetone
EXNO     2
PROCNO   1
F2 - Acquisition Parameters
Date_    20220607
Time     17.23
INSTRUM spect
PROBHD   5 mm PABBO BB-
PULPROG zg30
TD       64098
SOLVENT  Acetone
NS       32
DS       0
SWH      32051.281 Hz
FIDRES   0.500036 Hz
AQ       0.9999288 sec
RG       203
DW       15.600 usec
DE       6.50 usec
TE       296.1 K
D1       1.00000000 sec

===== CHANNEL f1 =====
NUC1     11B
P1       13.10 usec
PLW1     95.00000000 W
SFOL     160.4615792 MHz

F2 - Processing parameters
SI       32768
SF       160.4615790 MHz
WDW      EM
SSB      0
LB       10.00 Hz
GB       0
PC       1.40

```

[NEt4][2,3,4,5,6-5]-12-Br-CB11H6]  
 160MHz, 11B NMR, 5mg, 0.5mL Acetone-d6\*, 296K.

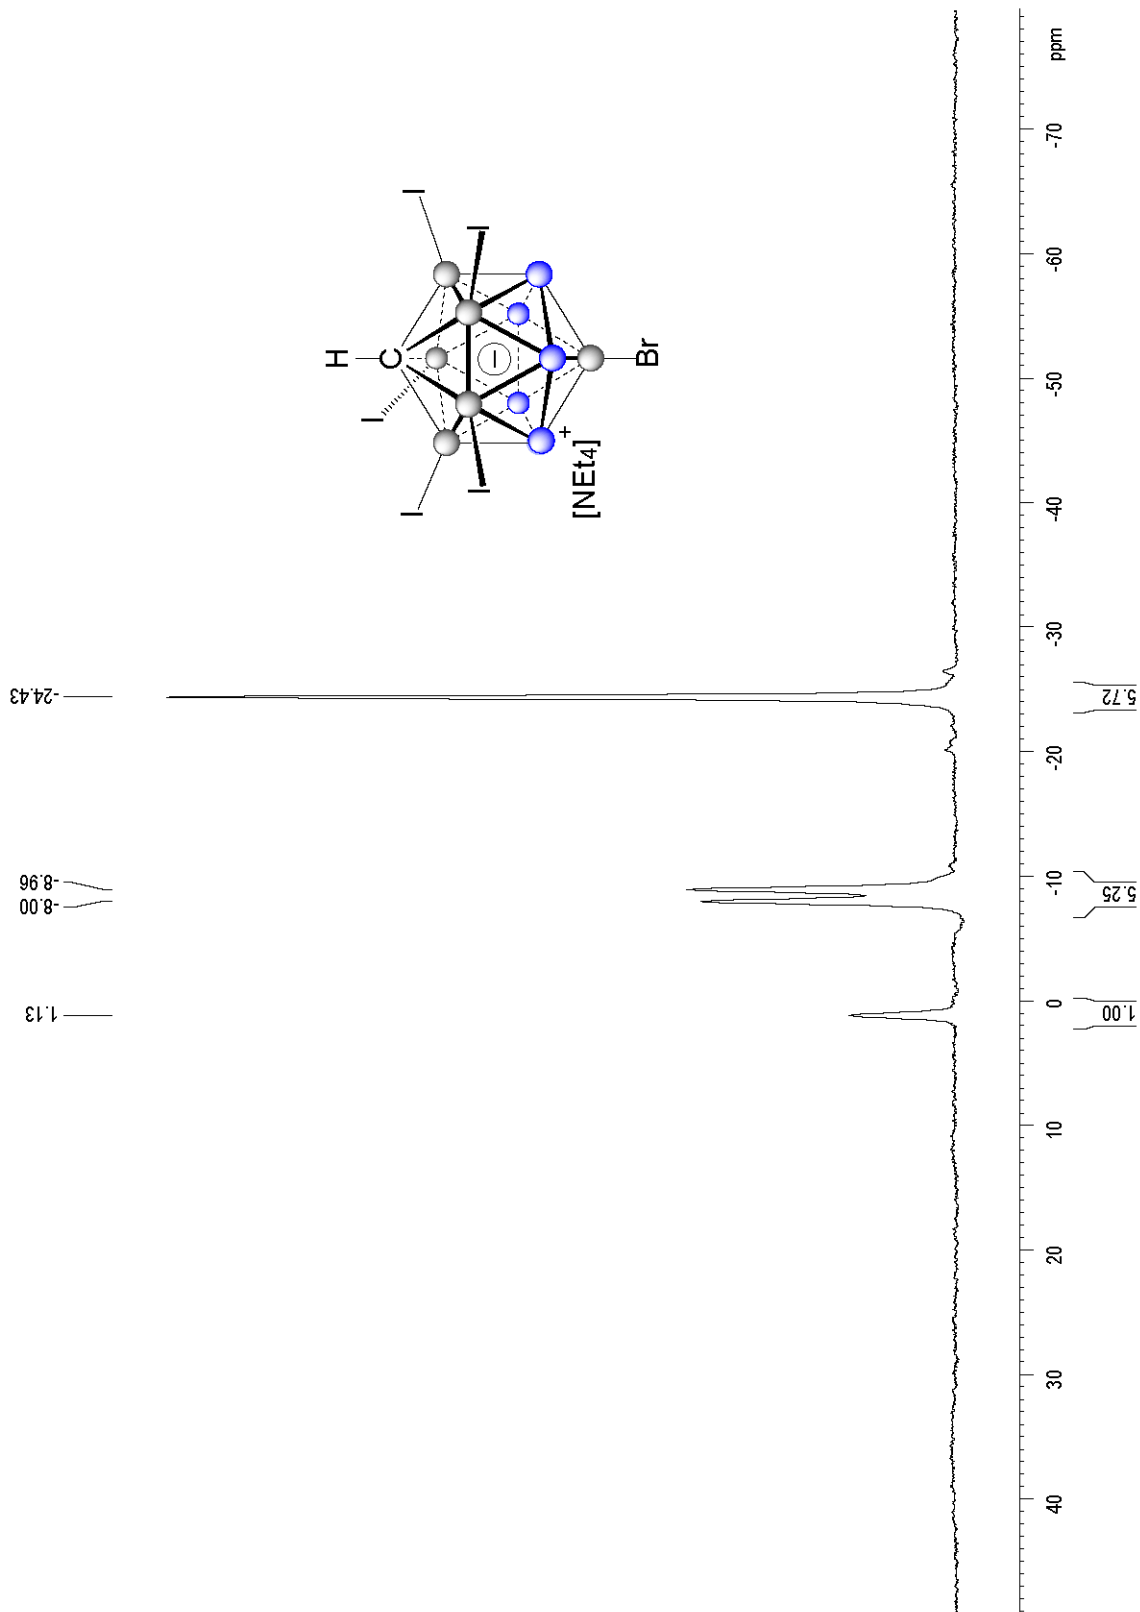

Current Data Parameters  
 NAME I1B{1H} NMR,500M,Aceton  
 EXPNO 4  
 PROCNO 1

F2 - Acquisition Parameters  
 Date\_ 20220607  
 Time 17:27  
 INSTRUM Spect  
 PROBHD 5 mm PABBO BB-  
 PULPROG zgpg30  
 TD 65536  
 SOLVENT Acetone  
 NS 16  
 DS 0  
 SWH 32051.281 Hz  
 FIDRES 0.489064 Hz  
 AQ 1.0223616 sec  
 RG 203  
 DW 15.600 usec  
 DE 6.50 usec  
 TE 296.4 K  
 D1 1.00000000 sec  
 D11 0.03000000 sec

===== CHANNEL f1 =====  
 NUC1 I1B  
 P1 13.10 usec  
 PLW1 95.00000000 W  
 SFO1 160.4615790 MHz

===== CHANNEL f2 =====  
 CDPRG[2] waitz16  
 NUC2 1H  
 PCPD2 80.00 usec  
 PLW2 19.00000000 W  
 PLM12 0.42394000 W  
 PLM13 0.27131999 W  
 SFO2 500.1325007 MHz

F2 - Processing parameters  
 SI 32768  
 SF 160.4615790 MHz  
 WDW EM  
 SSB 0  
 LB 10.00 Hz  
 GB 0  
 PC 1.40

[NEt4][3,4,5,6-tetra-*i*-butyl-1,2-dibromobenzene]  
 160MHz, 11B{1H} NMR, 5mg, 0.5mL Acetone-d6\*, 296K

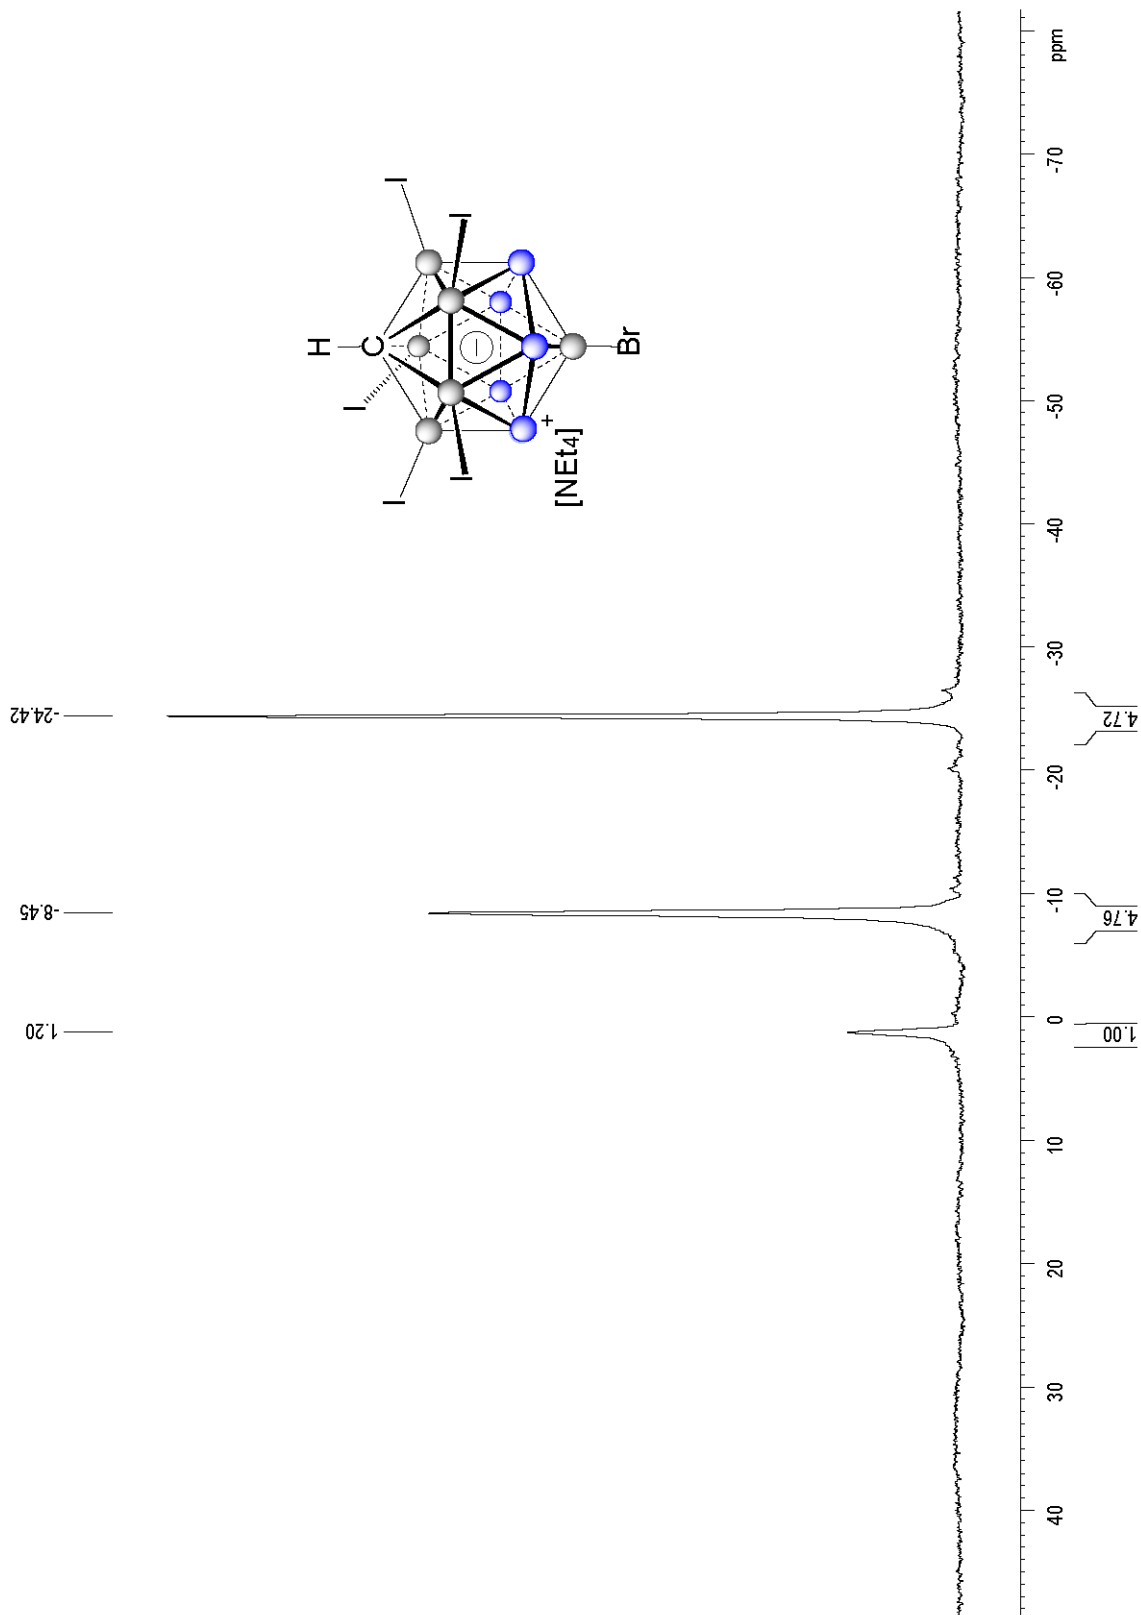

[NEt<sub>4</sub>][2,3,4,5,6,5'-I-12-Br-CB11H6]  
 101M, <sup>13</sup>C{<sup>1</sup>H} NMR, 5mg, 0.5 mL Acetone-d<sub>6</sub>, 296K

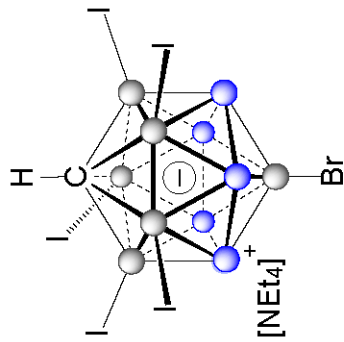

```
Current Data Parameters
NAME 13C{1H} NMR, 400M, Acetone
EXPNO 1
PROCNO 1
F2 - Acquisition Parameters
Date_ 20220913
Time 14.56
INSTRUM spect
PROBHD 5 mm PABBO BB/
PULPROG zgpg30
TD 65536
SOLVENT Acetone
NS 2048
DS 4
SWH 29761.904 Hz
FIDRES 0.454131 Hz
AQ 1.1010048 sec
RG 193.34
DM 16.800 usec
DE 6.50 usec
TE 296.9 K
D1 1.50000000 sec
D11 0.03000000 sec
TD0 1
===== CHANNEL f1 =====
NUC1 13C
P1 10.00 usec
PLW1 53.0000000 W
SFO1 100.6228293 MHz
===== CHANNEL f2 =====
CPDPRG2 waltz16
NUC2 1H
PCPD2 80.00 usec
PLW2 12.50000000 W
PLW12 0.43945000 W
PLW13 0.28125000 W
SFO2 400.1316005 MHz
F2 - Processing parameters
SI 32768
SF 100.6126784 MHz
WDW EM
SBB 0
LB 10.00 Hz
GB 0
PC 1.40
```

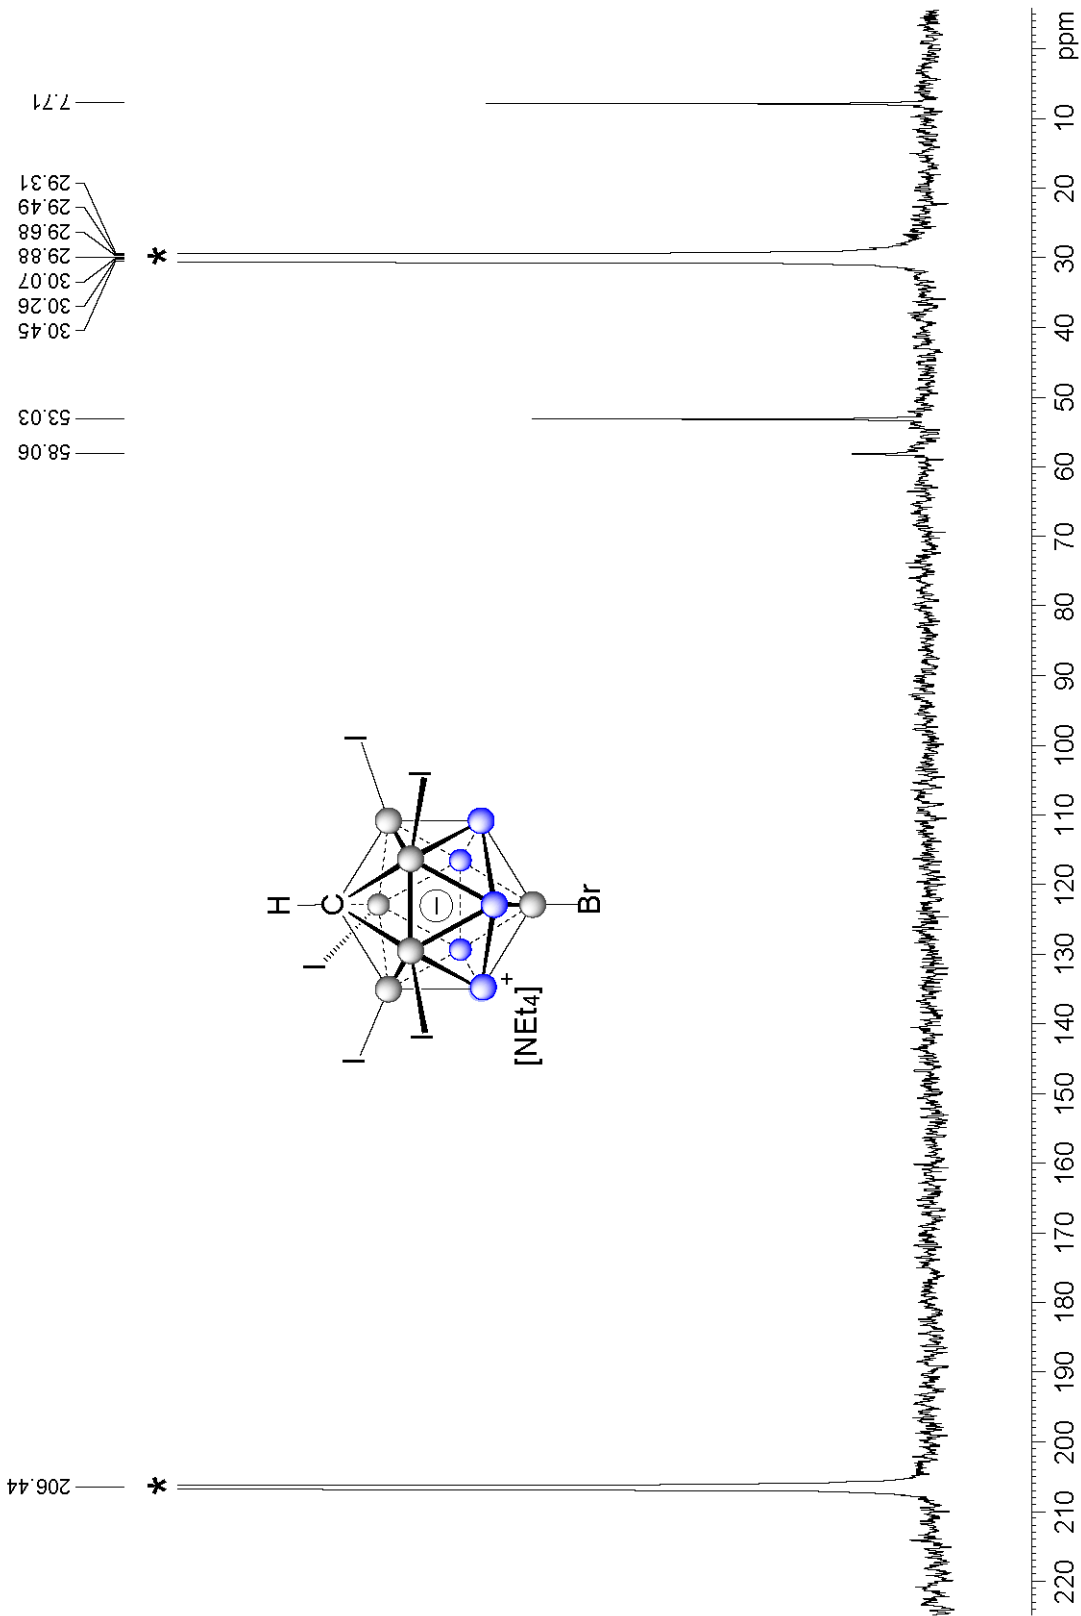



# ESI-HRMS

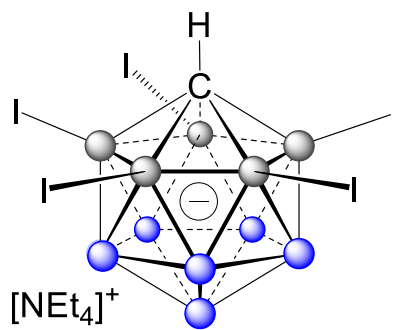

|             |            |                        |         |                 |                                 |
|-------------|------------|------------------------|---------|-----------------|---------------------------------|
| Sample Name | Sample22   | Position               | P2-811  | Instrument Name | Instrument 1                    |
| User Name   |            | Inj Vol                | 0.1     | InjPosition     |                                 |
| Sample Type | Sample     | IRM Calibration Status | Success | Data Filename   | LCH230206-SI.d                  |
| ACQ Method  | a-3-100V.m | Comment                |         | Acquired Time   | 2/6/2023 1:43:49 PM (UTC+08:00) |

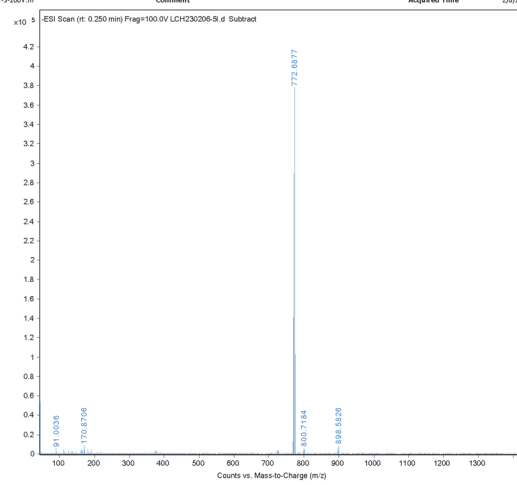

|             |            |                        |         |                 |                                 |
|-------------|------------|------------------------|---------|-----------------|---------------------------------|
| Sample Name | Sample22   | Position               | P2-811  | Instrument Name | Instrument 1                    |
| User Name   |            | Inj Vol                | 0.1     | InjPosition     |                                 |
| Sample Type | Sample     | IRM Calibration Status | Success | Data Filename   | LCH230206-SI.d                  |
| ACQ Method  | a-3-100V.m | Comment                |         | Acquired Time   | 2/6/2023 1:43:49 PM (UTC+08:00) |

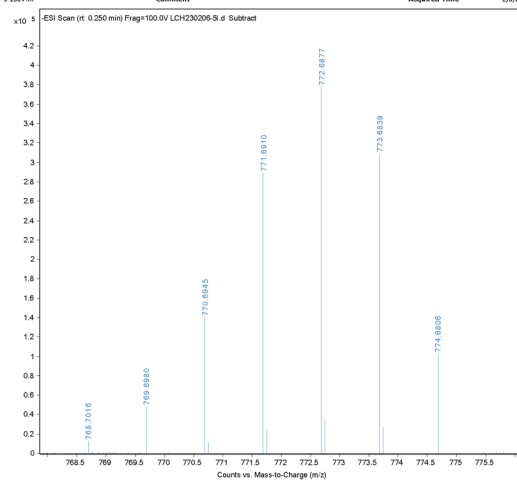

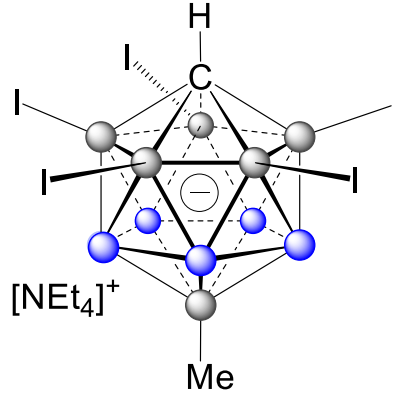

## ESI-HRMS

|             |            |                        |         |                 |                                 |
|-------------|------------|------------------------|---------|-----------------|---------------------------------|
| Sample Name | Sample42   | Position               | P1-09   | Instrument Name | Instrument 1                    |
| User Name   |            | Inj Vol                | 0.2     | Inj Position    |                                 |
| Sample Type | Sample     | IQM Calibration Status | Success | Data Filename   | LCH230207-12-Me.d               |
| ACQ Method  | s-3-100V.m | Comment                |         | Acquired Time   | 2/8/2012 1:40:09 PM (UTC+08:00) |

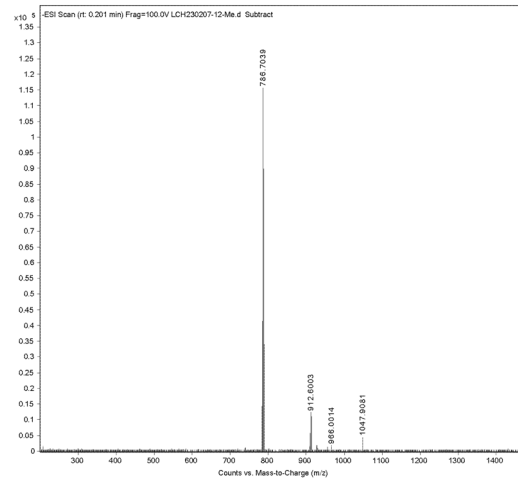

|             |            |                        |         |                 |                                 |
|-------------|------------|------------------------|---------|-----------------|---------------------------------|
| Sample Name | Sample42   | Position               | P1-09   | Instrument Name | Instrument 1                    |
| User Name   |            | Inj Vol                | 0.2     | Inj Position    |                                 |
| Sample Type | Sample     | IQM Calibration Status | Success | Data Filename   | LCH230207-12-Me.d               |
| ACQ Method  | s-3-100V.m | Comment                |         | Acquired Time   | 2/8/2012 1:40:09 PM (UTC+08:00) |

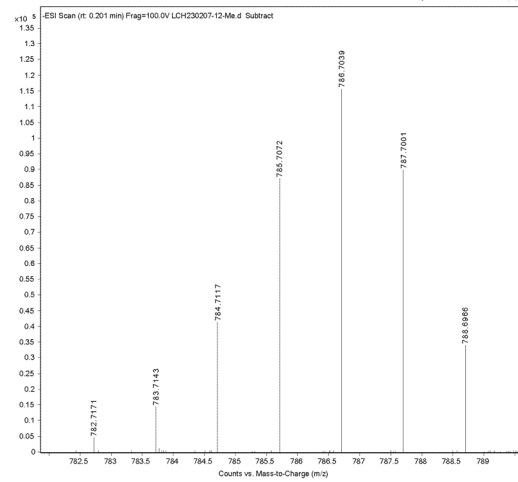

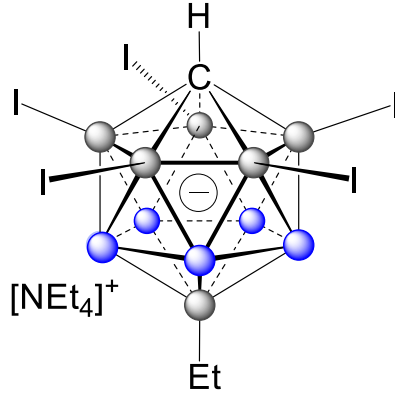

## ESI-HRMS

|             |           |                        |         |                 |                                 |
|-------------|-----------|------------------------|---------|-----------------|---------------------------------|
| Sample Name | Sample24  | Position               | P2-C2   | Instrument Name | Instrument 1                    |
| User Name   |           | Inj Vol                | 0.1     | InjPosition     |                                 |
| Sample Type | Sample    | IQM Calibration Status | Success | Data Filename   | LCH230206-12-El.d               |
| ACQ Method  | *3-100V.m | Comment                |         | Acquired Time   | 2/6/2022 1:53:25 PM (UTC+08:00) |

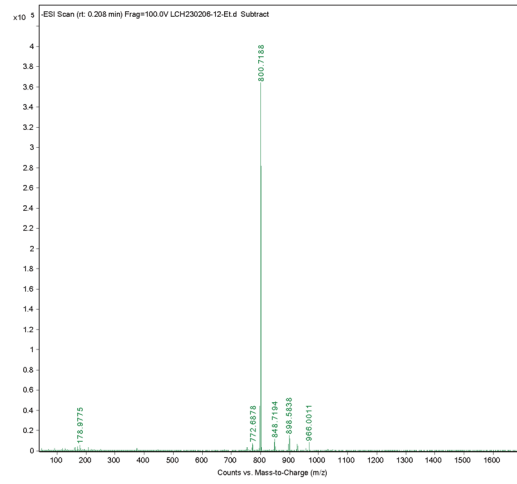

|             |           |                        |         |                 |                                 |
|-------------|-----------|------------------------|---------|-----------------|---------------------------------|
| Sample Name | Sample24  | Position               | P2-C2   | Instrument Name | Instrument 1                    |
| User Name   |           | Inj Vol                | 0.1     | InjPosition     |                                 |
| Sample Type | Sample    | IQM Calibration Status | Success | Data Filename   | LCH230206-12-El.d               |
| ACQ Method  | *3-100V.m | Comment                |         | Acquired Time   | 2/6/2022 1:53:25 PM (UTC+08:00) |

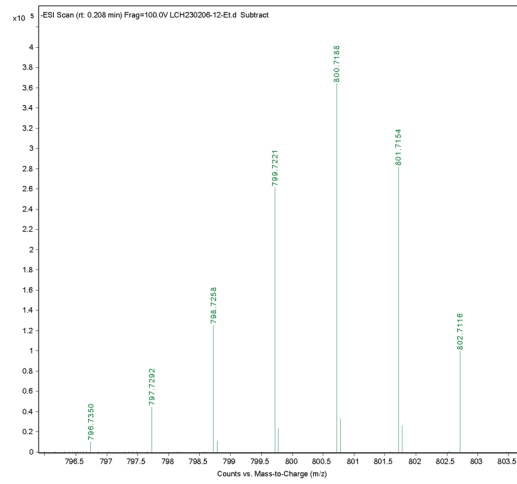

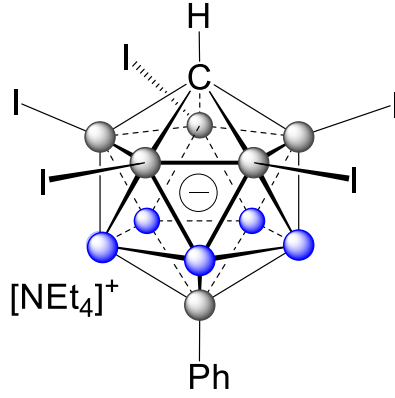

## ESI-HRMS

| Sample Name | Sample1   | Position               | P1-08   | Instrument Name | Instrument 1                    |
|-------------|-----------|------------------------|---------|-----------------|---------------------------------|
| User Name   |           | Inj Vol                | 0.2     | InjPosition     |                                 |
| Sample Type | Sample    | IDM Calibration Status | Success | Data Filename   | LCH230207-12-Ph.d               |
| ACQ Method  | *3-100V.m | Comment                |         | Acquired Time   | 2/8/2023 1:32:30 PM (UTC+08:00) |

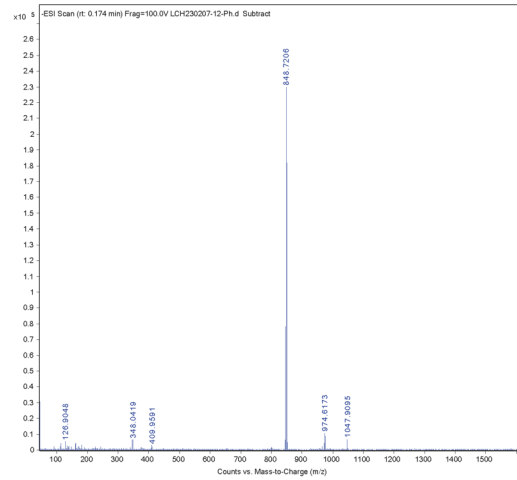

| Sample Name | Sample1   | Position               | P1-08   | Instrument Name | Instrument 1                    |
|-------------|-----------|------------------------|---------|-----------------|---------------------------------|
| User Name   |           | Inj Vol                | 0.2     | InjPosition     |                                 |
| Sample Type | Sample    | IDM Calibration Status | Success | Data Filename   | LCH230207-12-Ph.d               |
| ACQ Method  | *3-100V.m | Comment                |         | Acquired Time   | 2/8/2023 1:32:30 PM (UTC+08:00) |

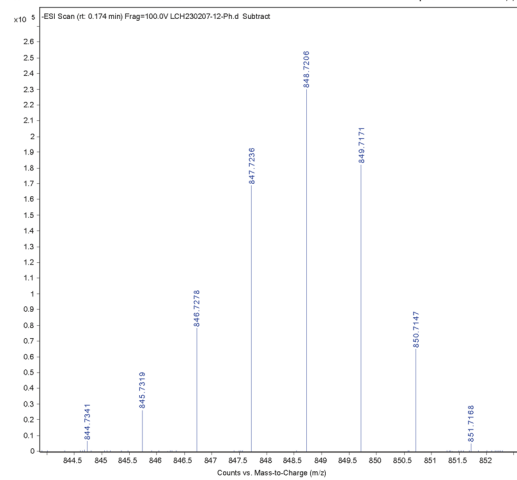

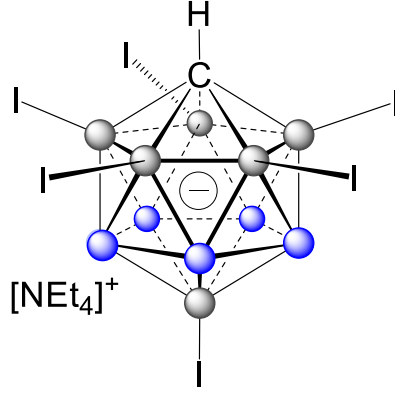

## HRMS

|                    |           |                               |         |                        |                                 |
|--------------------|-----------|-------------------------------|---------|------------------------|---------------------------------|
| <b>Sample Name</b> | Sample43  | <b>Position</b>               | P1-010  | <b>Instrument Name</b> | Instrument 1                    |
| <b>User Name</b>   |           | <b>Inj Vol</b>                | 0.5     | <b>InjPosition</b>     |                                 |
| <b>Sample Type</b> | Sample    | <b>IRN Calibration Status</b> | Success | <b>Data Filename</b>   | LCH230207-12-1.d                |
| <b>ACQ Method</b>  | *3-100V.m | <b>Comment</b>                |         | <b>Acquired Time</b>   | 2/8/2023 1:50:21 PM (UTC+08:00) |

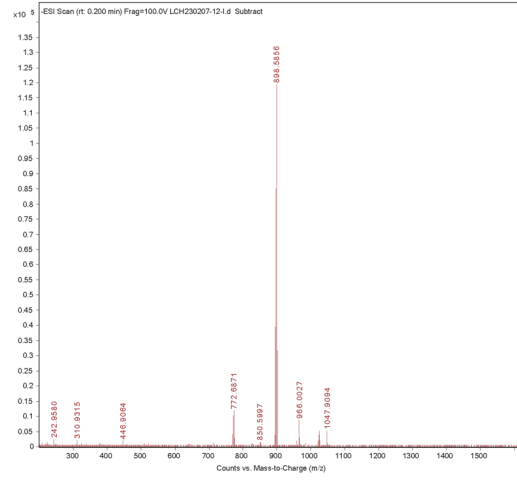

|                    |           |                               |         |                        |                                 |
|--------------------|-----------|-------------------------------|---------|------------------------|---------------------------------|
| <b>Sample Name</b> | Sample43  | <b>Position</b>               | P1-010  | <b>Instrument Name</b> | Instrument 1                    |
| <b>User Name</b>   |           | <b>Inj Vol</b>                | 0.5     | <b>InjPosition</b>     |                                 |
| <b>Sample Type</b> | Sample    | <b>IRN Calibration Status</b> | Success | <b>Data Filename</b>   | LCH230207-12-1.d                |
| <b>ACQ Method</b>  | *3-100V.m | <b>Comment</b>                |         | <b>Acquired Time</b>   | 2/8/2023 1:50:21 PM (UTC+08:00) |

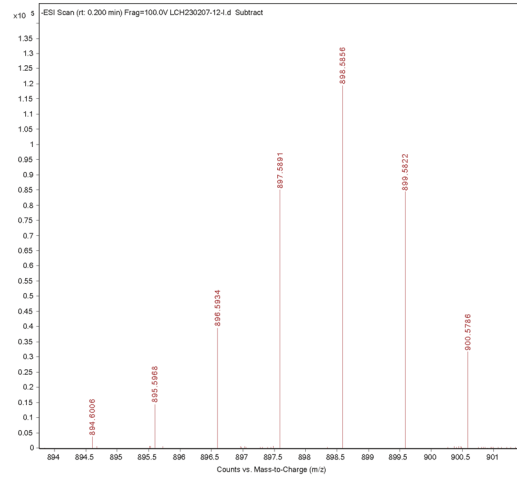

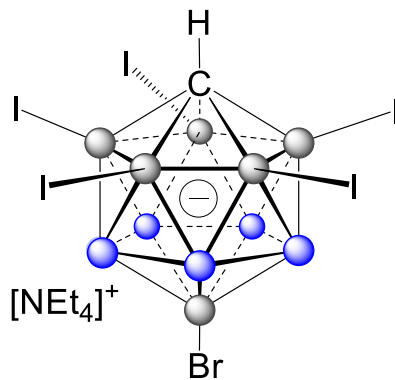

## ESI-HRMS

|             |            |                        |         |                 |                                 |
|-------------|------------|------------------------|---------|-----------------|---------------------------------|
| Sample Name | Sample27   | Position               | P2-C5   | Instrument Name | Instrument 1                    |
| User Name   |            | Eng Vol                | 0.1     | Eng Position    |                                 |
| Sample Type | Sample     | IRN Calibration Status | Success | Data Filename   | LCH230206-12-Br.d               |
| ACQ Method  | s-3-100V.m | Comment                |         | Acquired Time   | 2/6/2023 2:59:44 PM (UTC+08:00) |

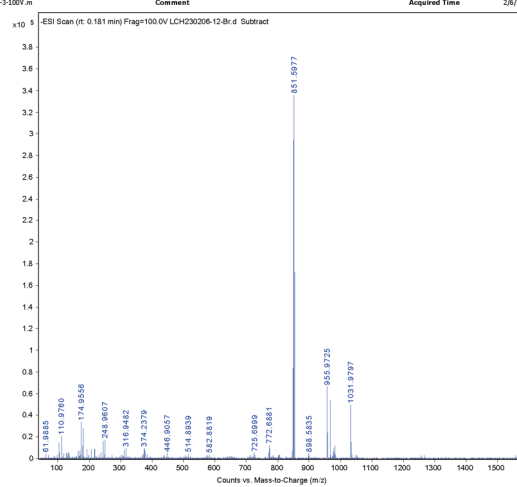

|             |            |                        |         |                 |                                 |
|-------------|------------|------------------------|---------|-----------------|---------------------------------|
| Sample Name | Sample27   | Position               | P2-C5   | Instrument Name | Instrument 1                    |
| User Name   |            | Eng Vol                | 0.1     | Eng Position    |                                 |
| Sample Type | Sample     | IRN Calibration Status | Success | Data Filename   | LCH230206-12-Br.d               |
| ACQ Method  | s-3-100V.m | Comment                |         | Acquired Time   | 2/6/2023 2:59:44 PM (UTC+08:00) |

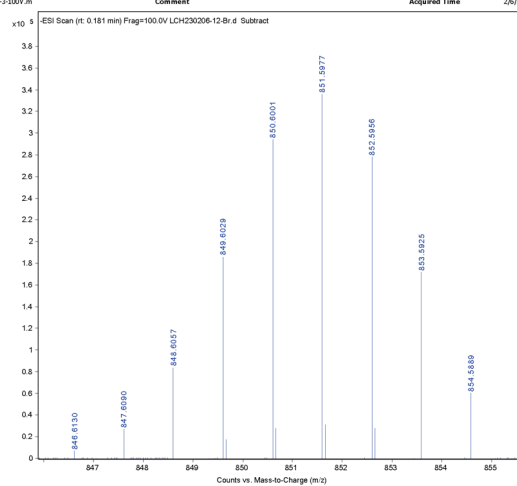

# Reference IR spectrum of [NEt<sub>4</sub>]Br

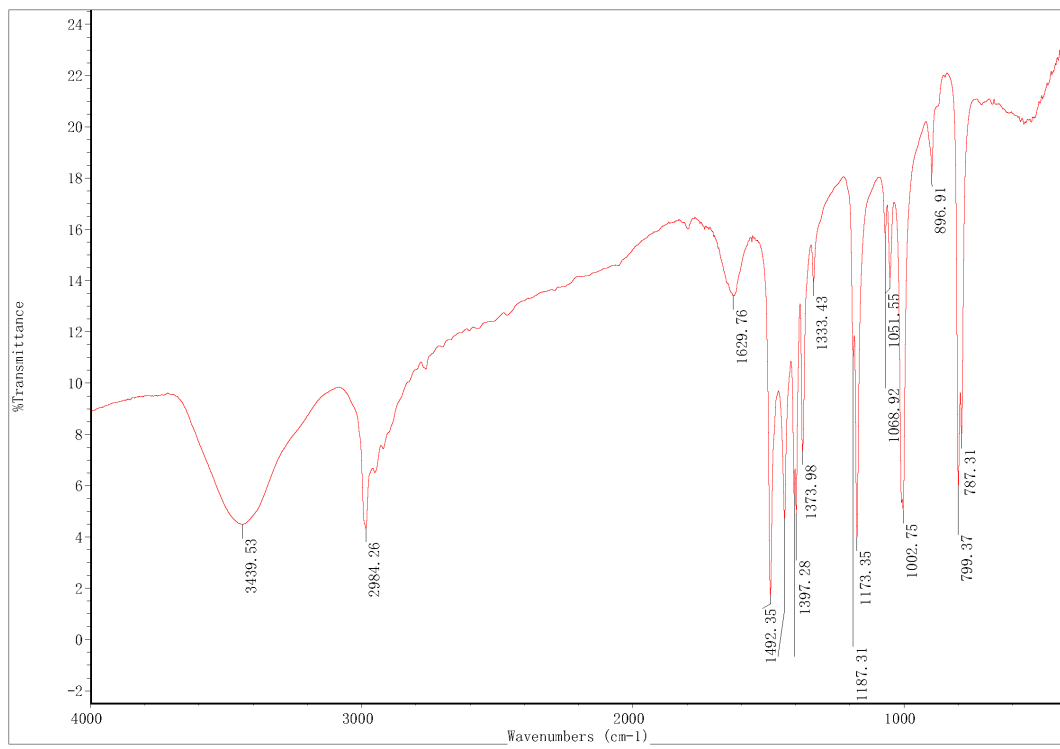

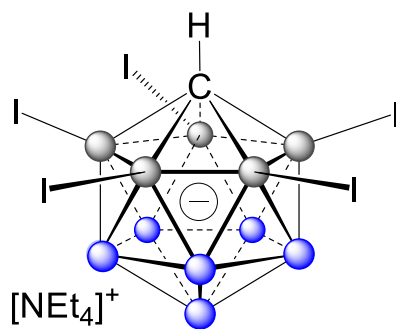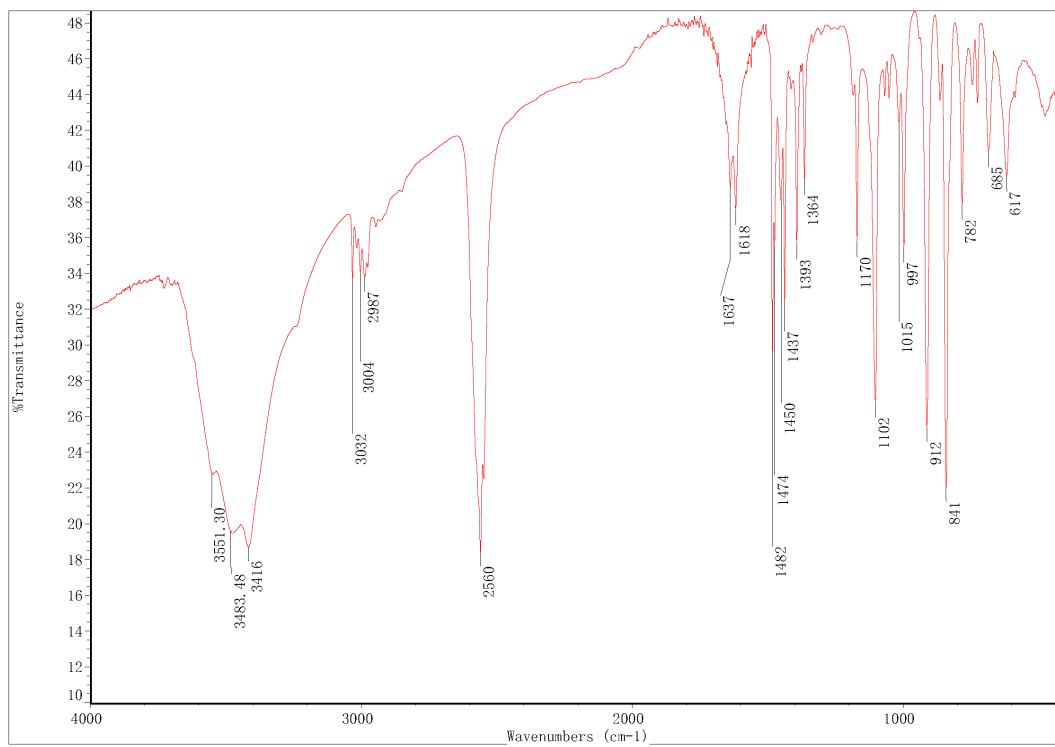



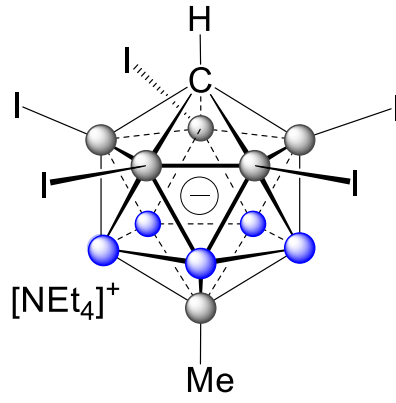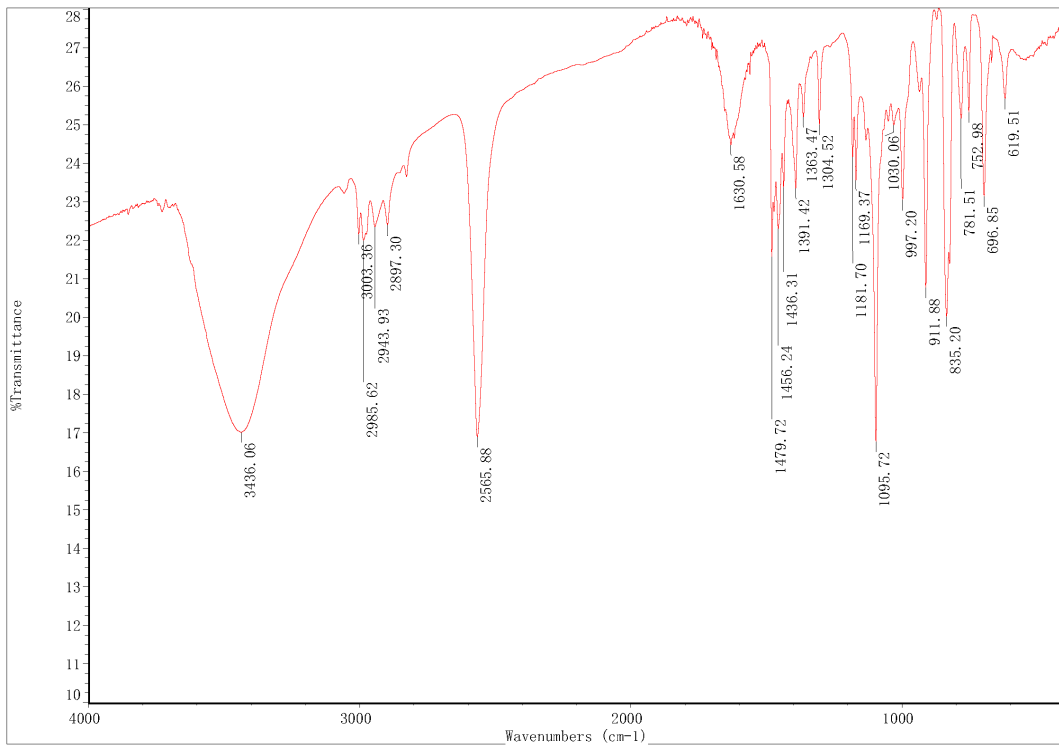

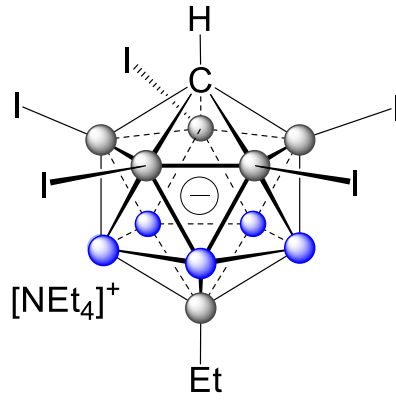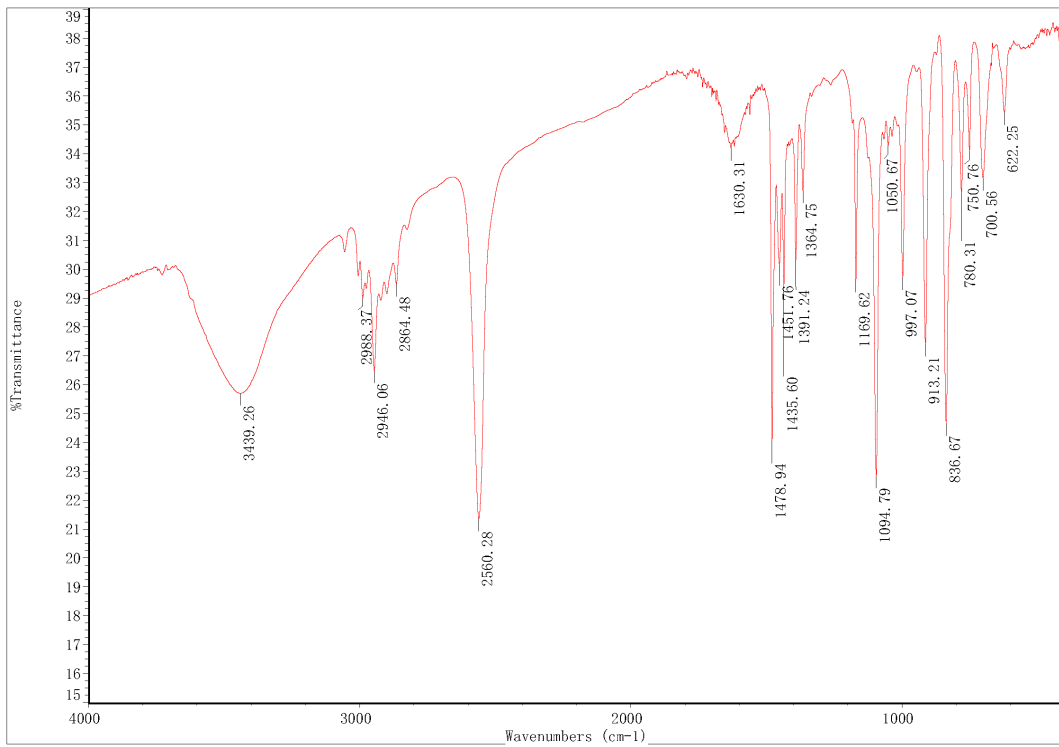

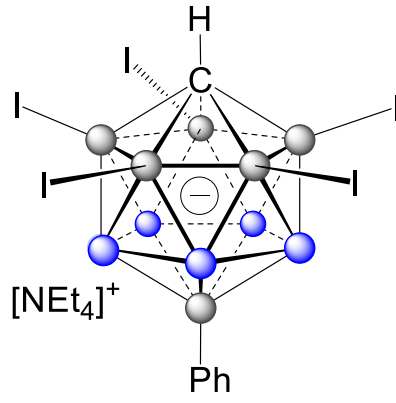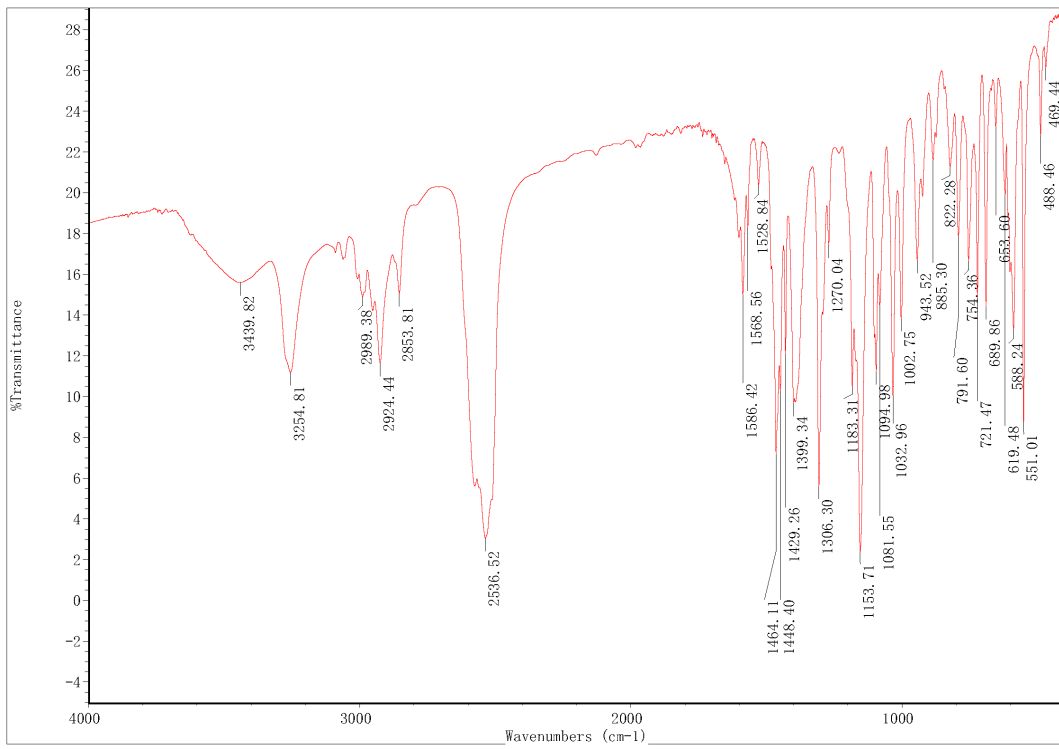

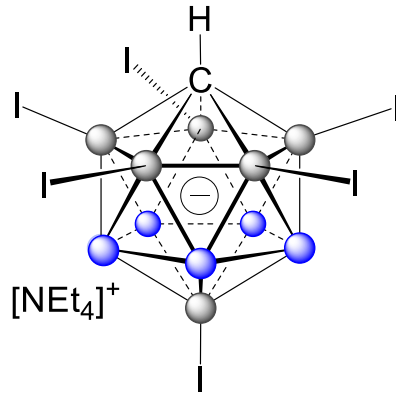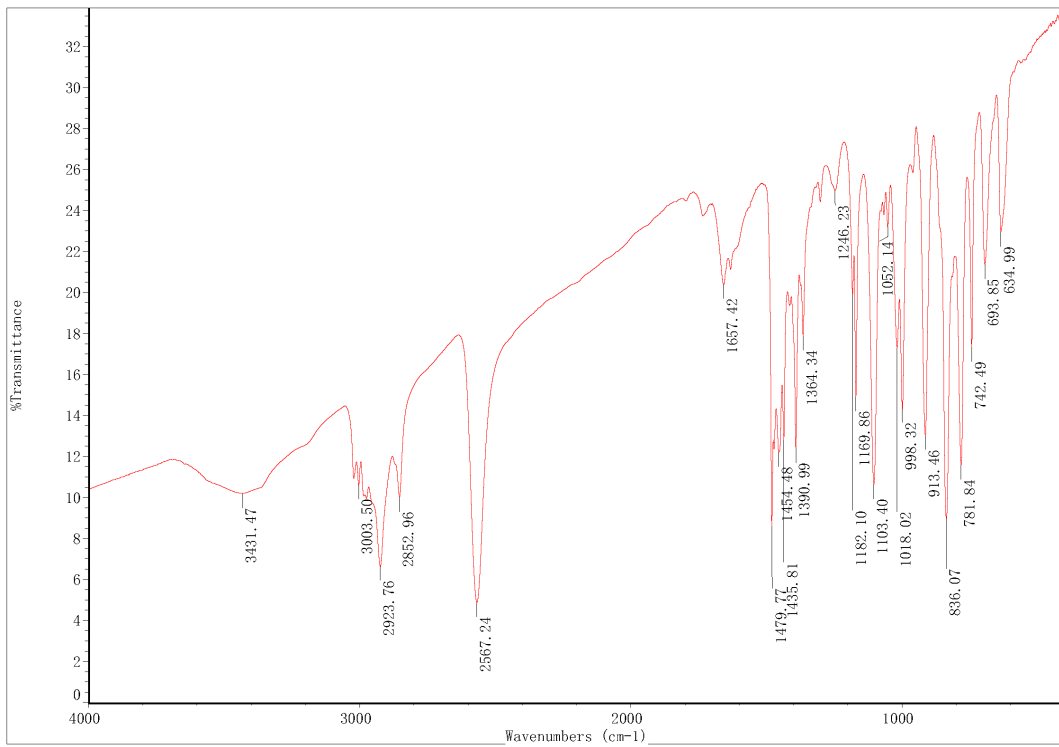

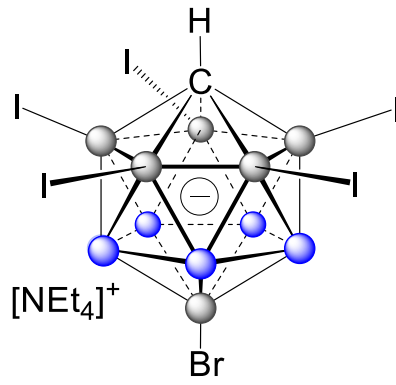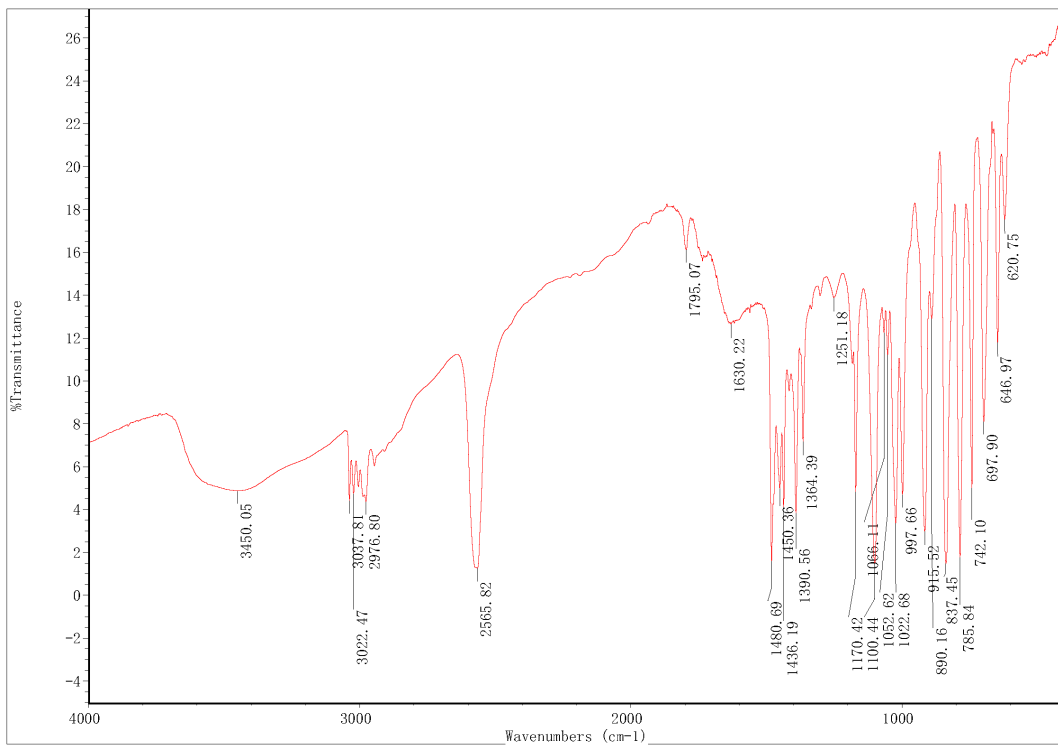

Supplement: d3dt02275g1.pdf [file d3dt02275g1.pdf]
